# Supplementary material for: Preparation and facile addition reactions of iminium salts derived from amino ketene silyl acetal and amino silyl enol ether
Source: Royal Society of Chemistry journal article supplement (doi:10.1039/d0ra05768a), 2020-01-01
Supplement: d0ra05768a1.pdf [file d0ra05768a1.pdf]

## Supporting Information

### Preparation and facile addition reactions of iminium salts derived from amino ketene silyl acetal and amino silyl enol ether

**Makoto Shimizu,<sup>\*a,b</sup> Shingo Hata,<sup>b</sup> Koichi Kondo,<sup>b</sup> Kazuhiro Murakami,<sup>b</sup> Isao Mizota,<sup>b</sup> and Yusong Zhu<sup>a</sup>**

*<sup>a</sup>School of Energy Science and Engineering, Nanjing Tech University, Nanjing 211816, Jiangsu Province, China*

*<sup>b</sup>Department of Chemistry for Materials, Graduate School of Engineering, Mie University, Tsu, Mie 514-8507, Japan*

Copies of <sup>1</sup>H and <sup>13</sup>C NMR Spectra-----S2-S65

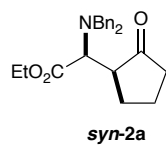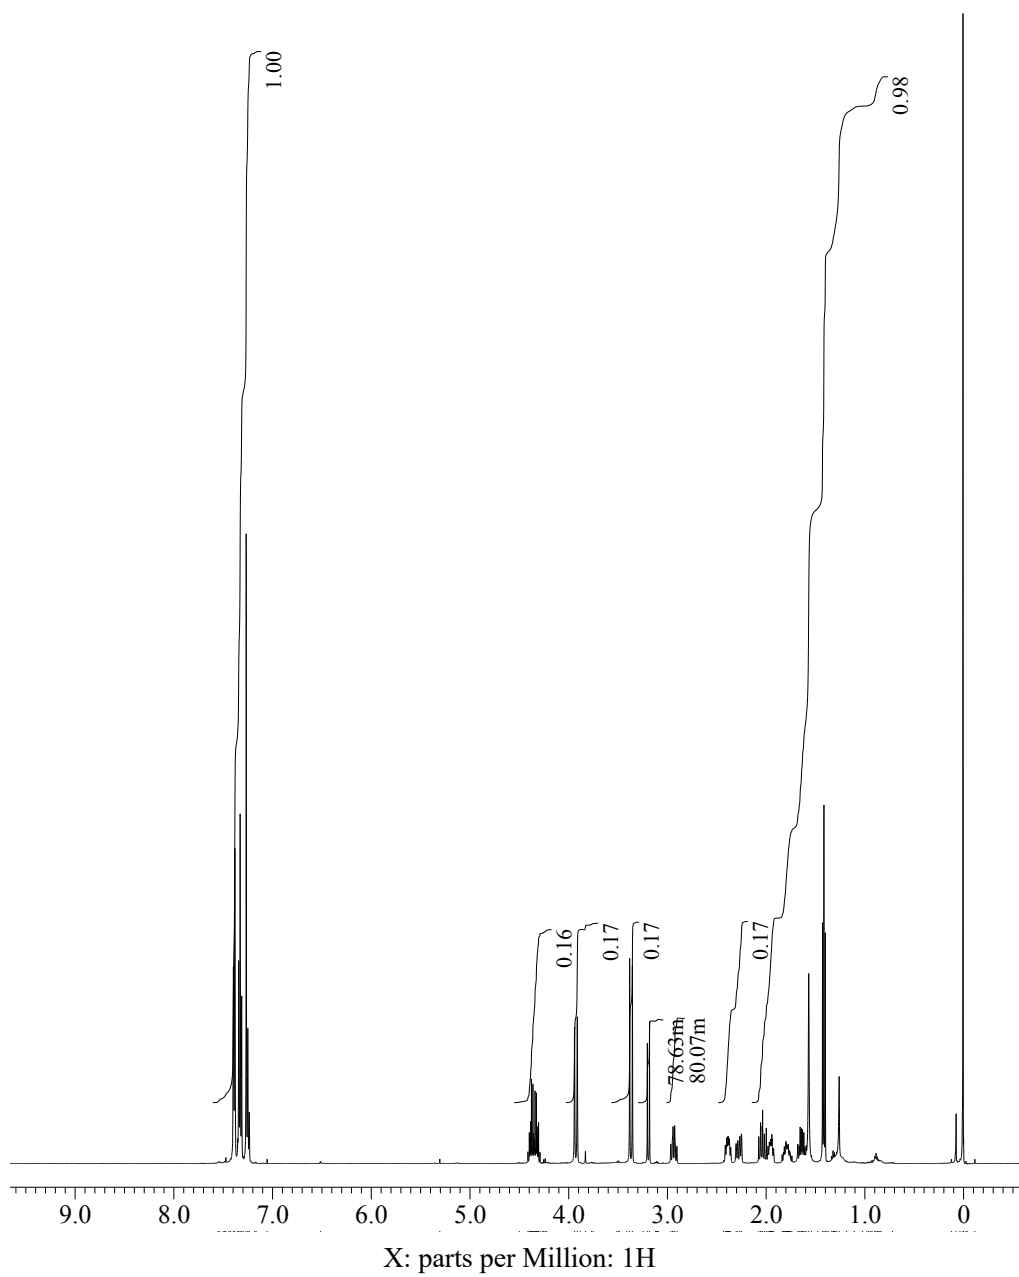

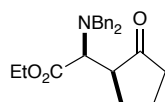

*syn-2a*

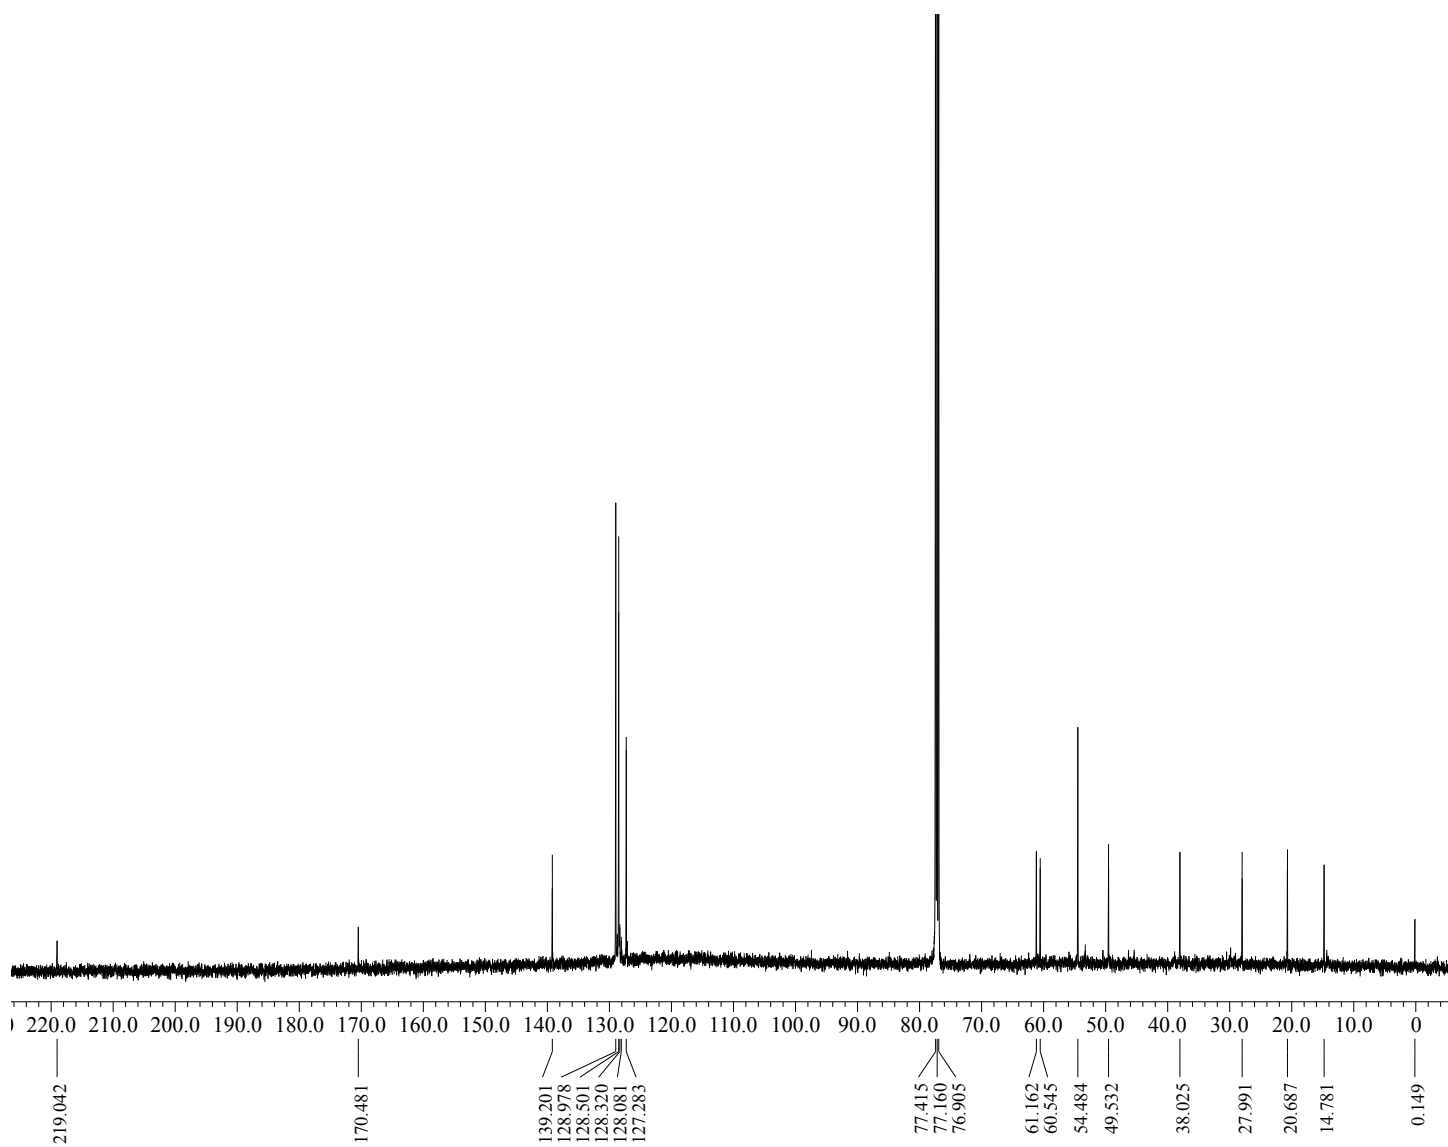

X: parts per Million: <sup>13</sup>C

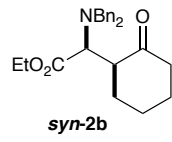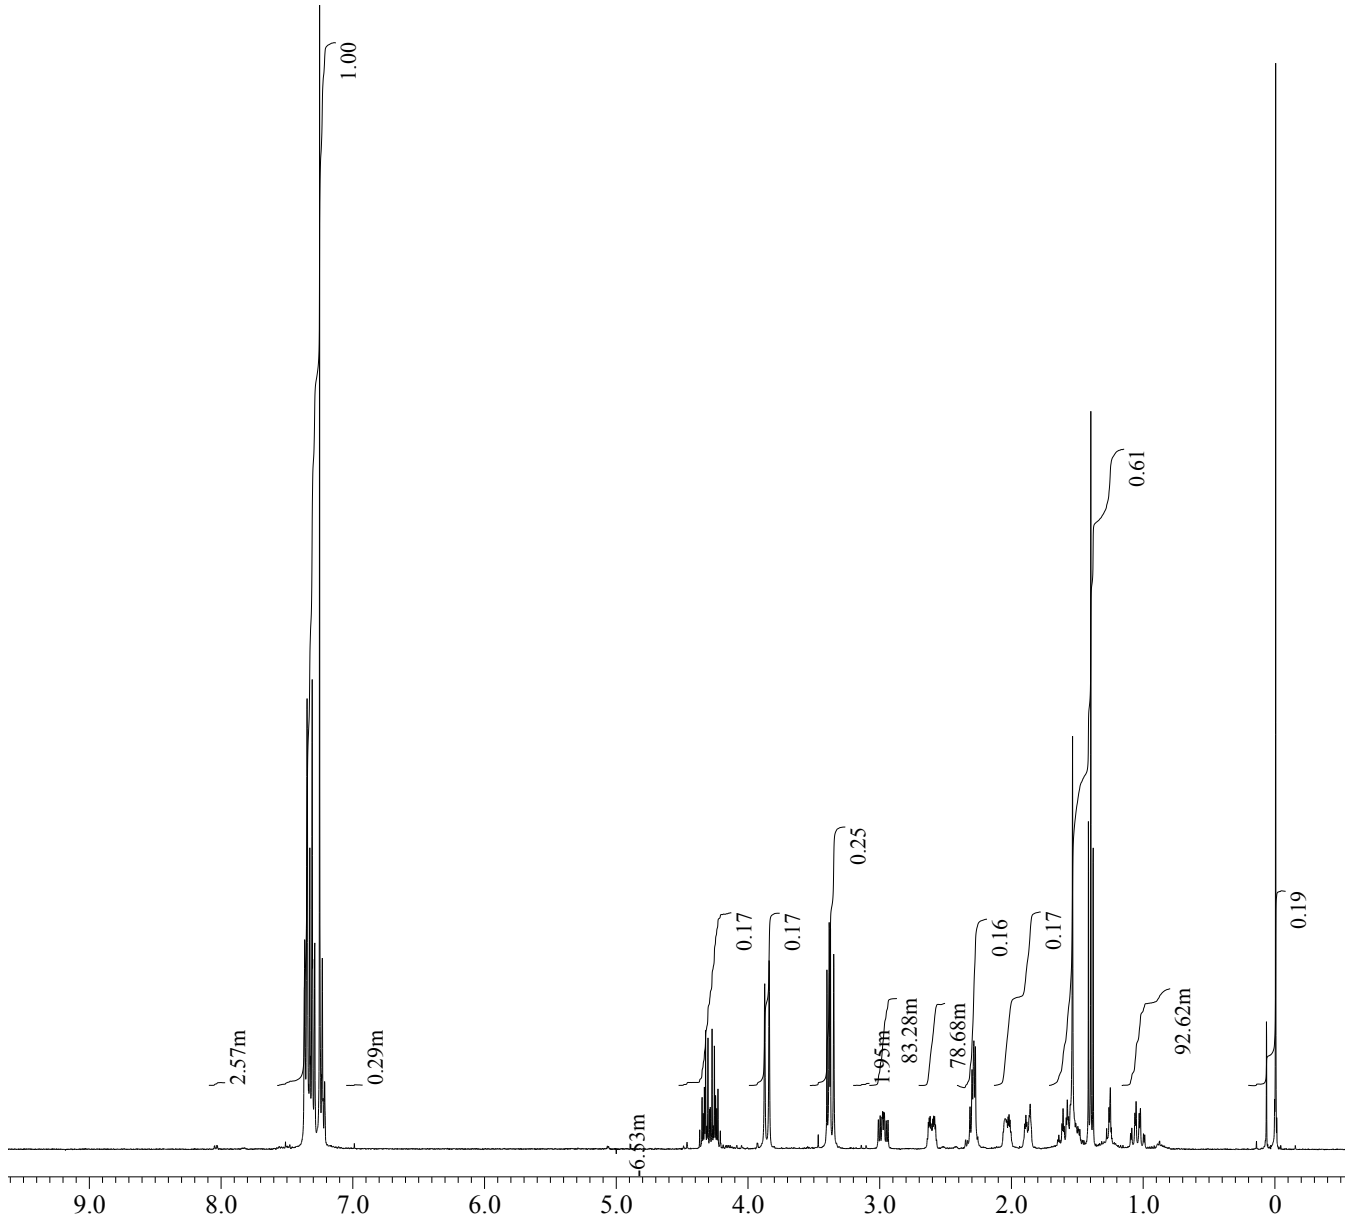

X: parts per Million: 1H

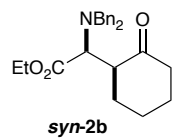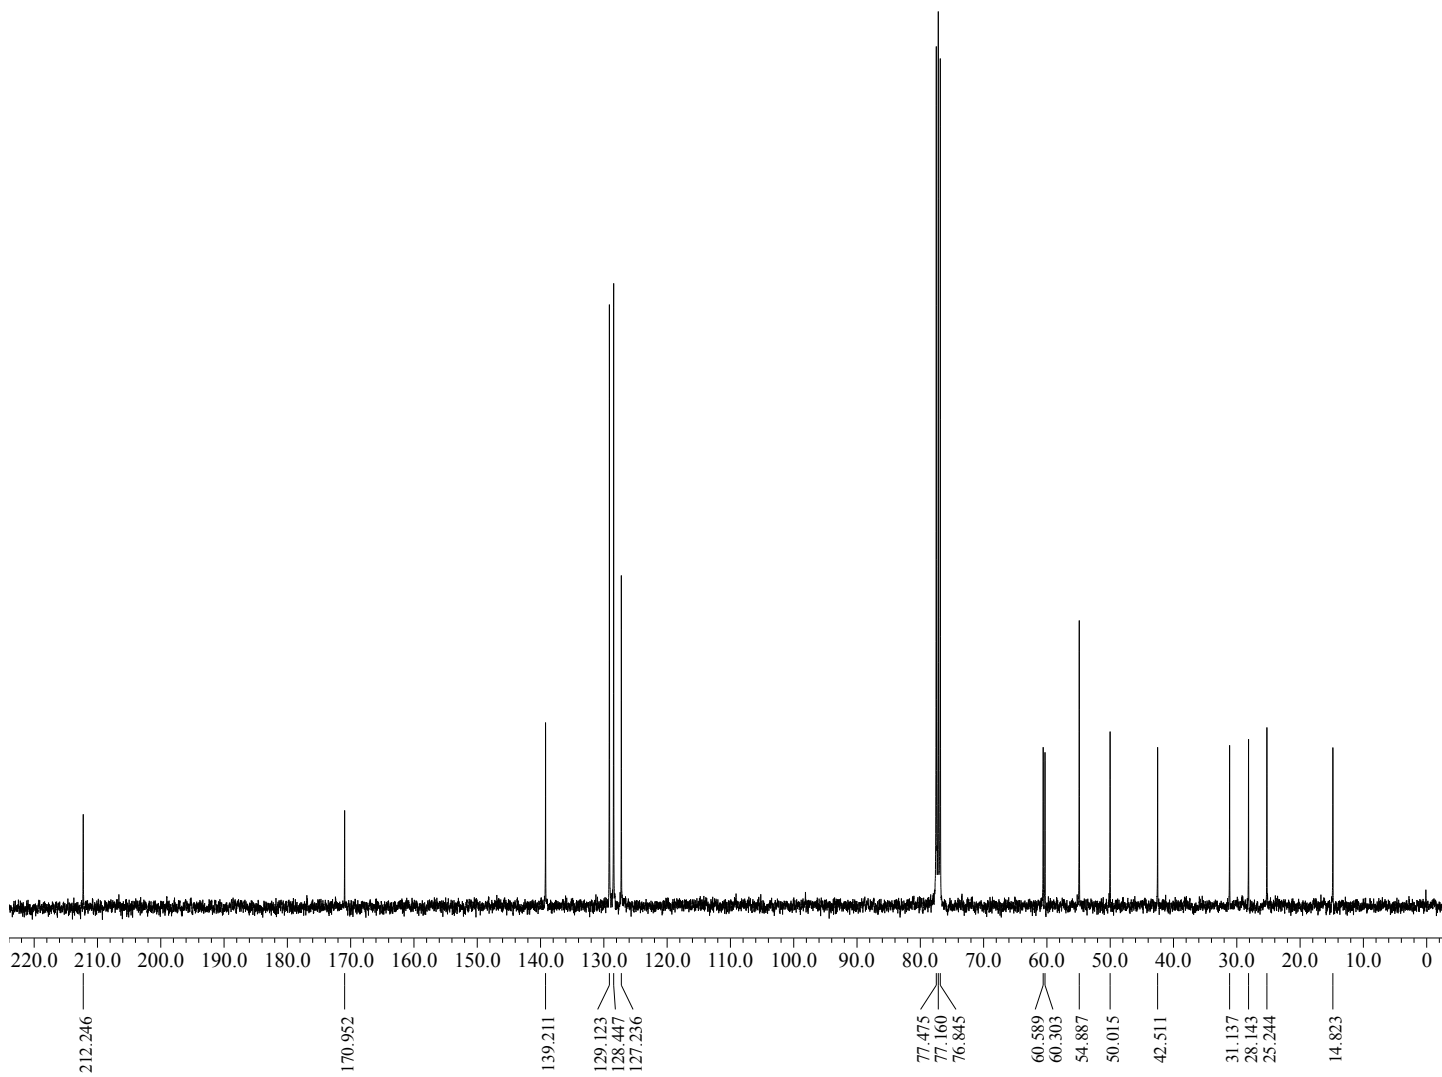

X: parts per Million: <sup>13</sup>C

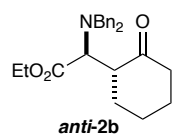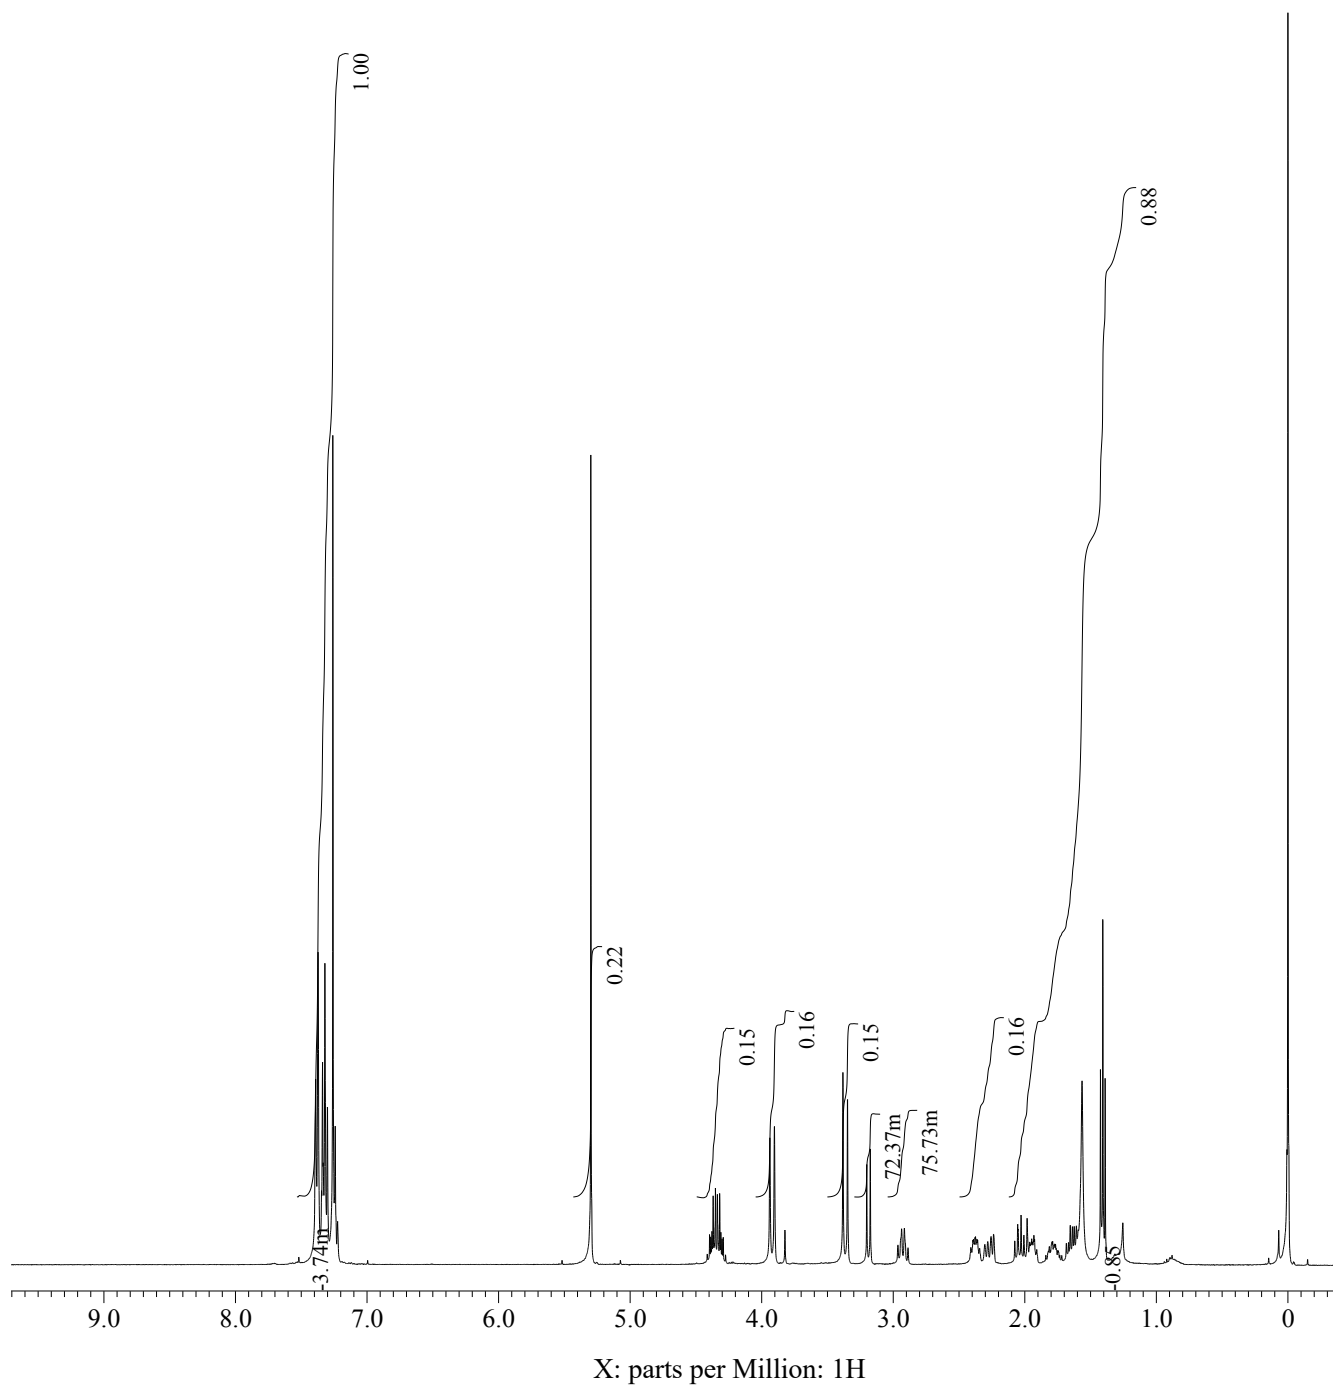

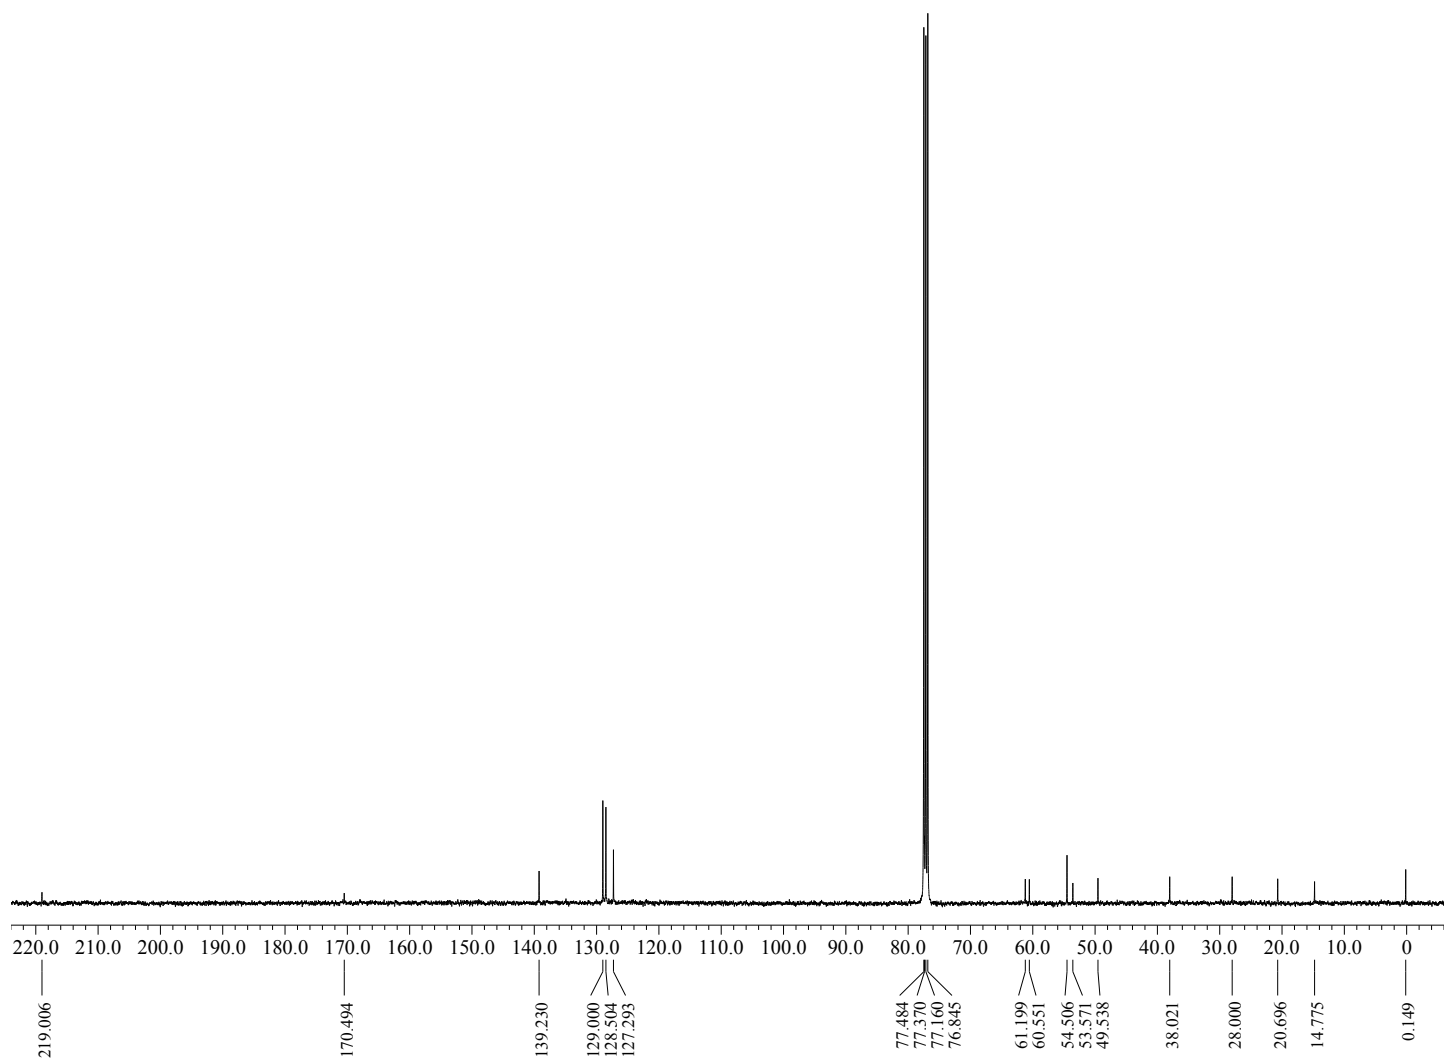

X: parts per Million: 13C

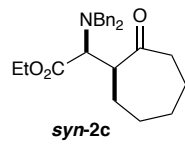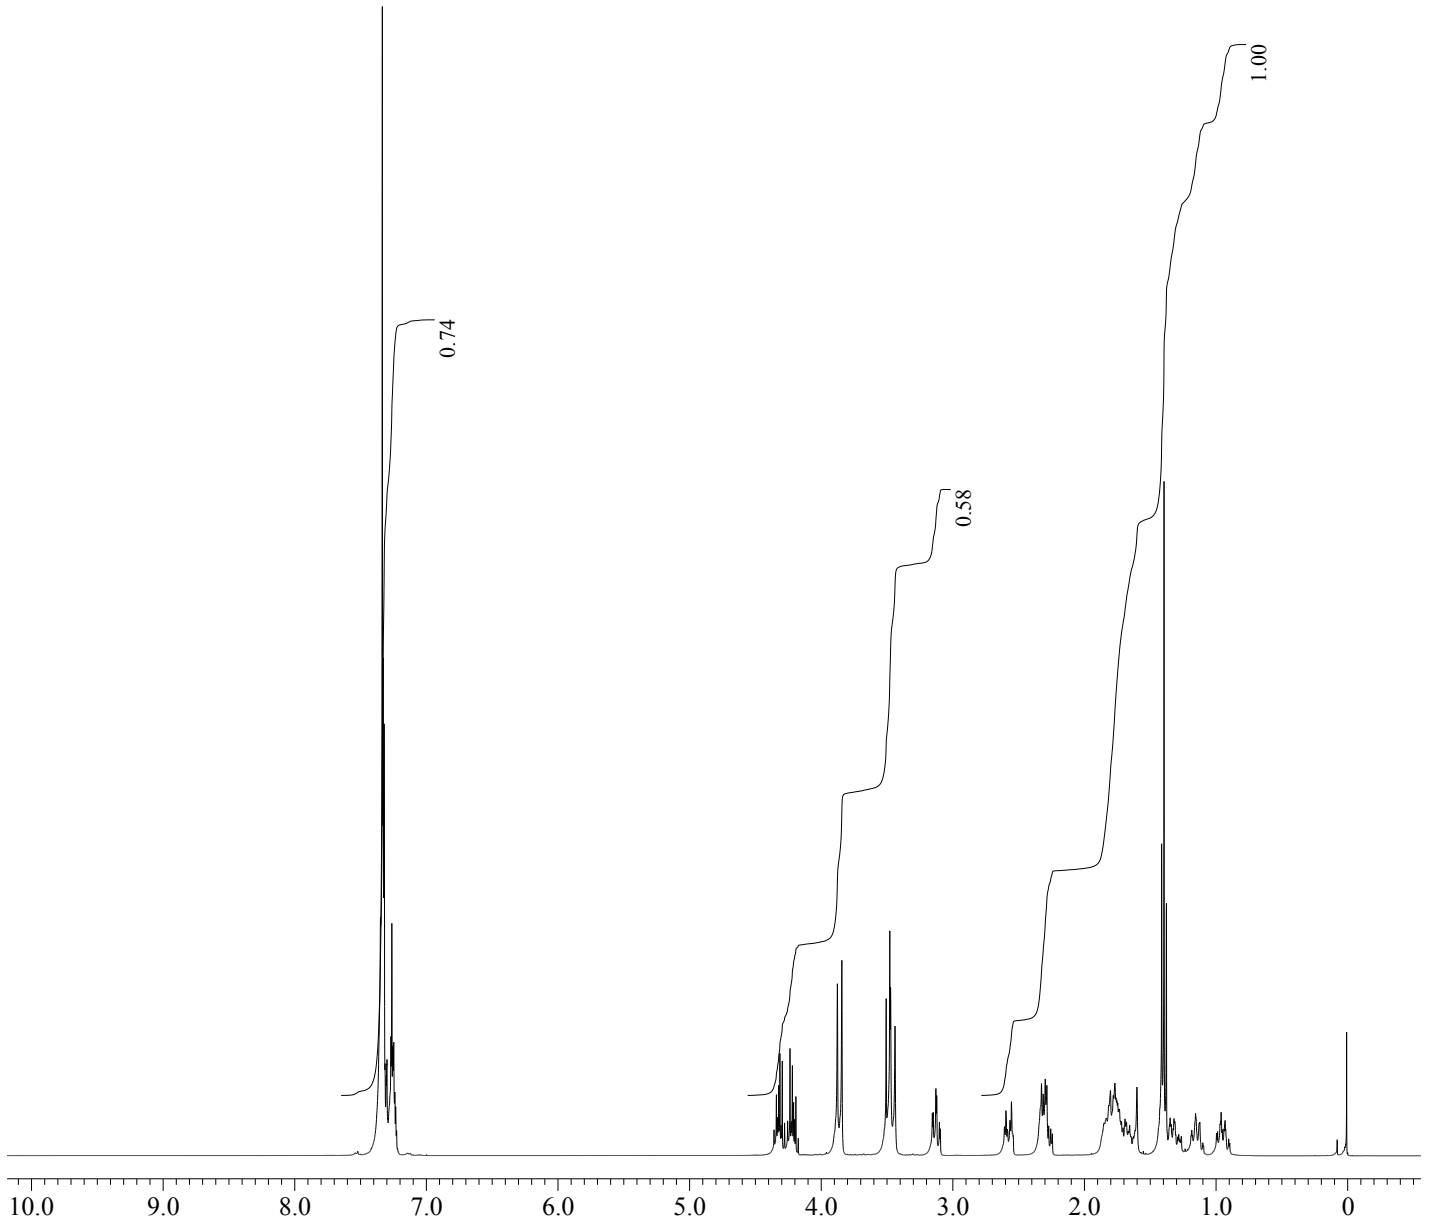

X: parts per Million: 1H



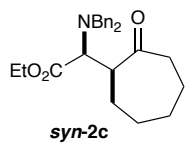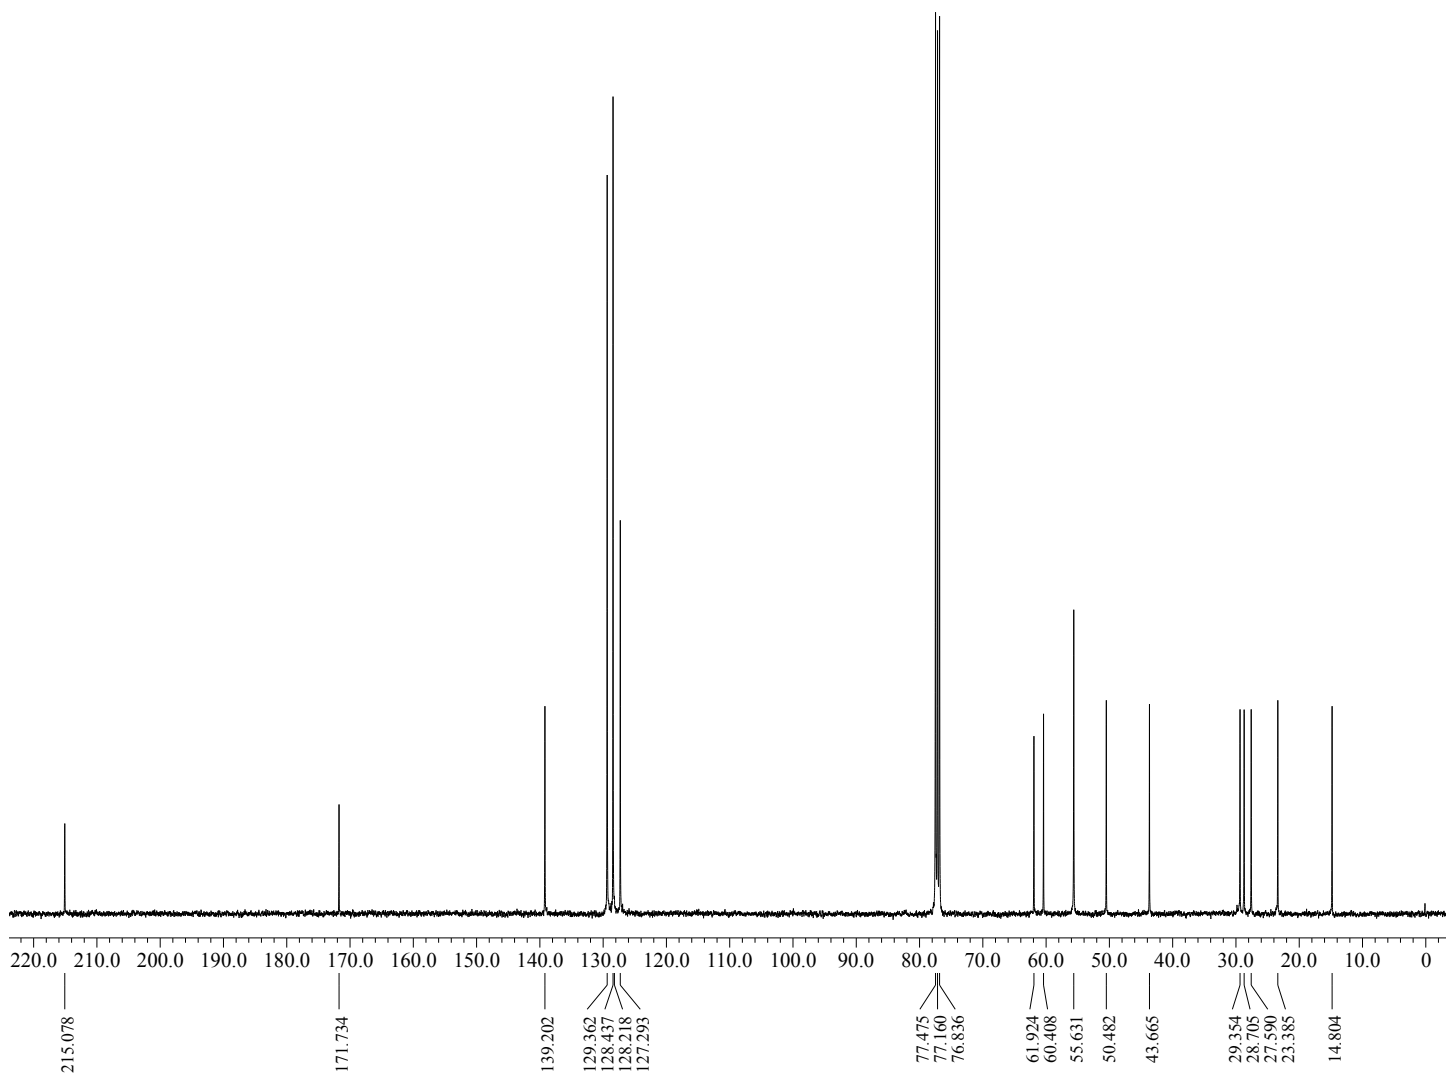

X: parts per Million: 13C

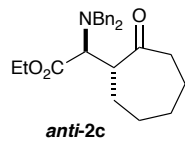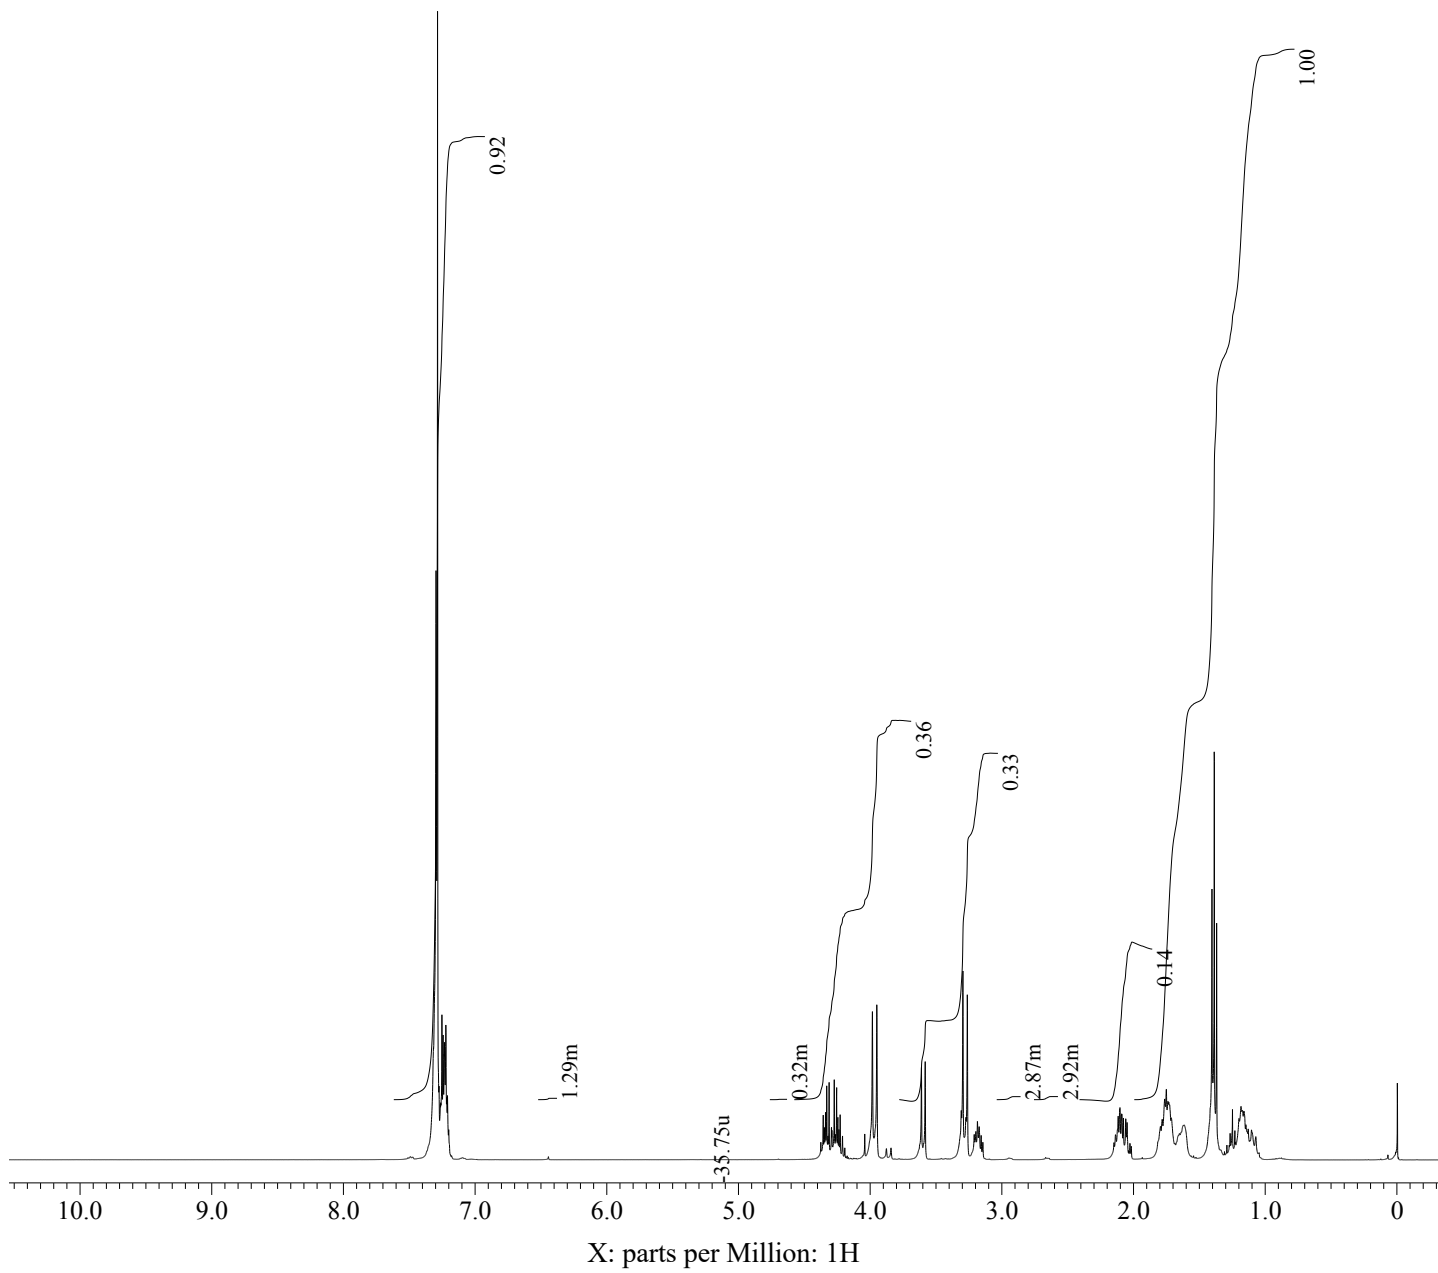

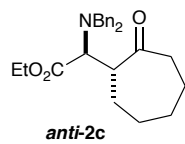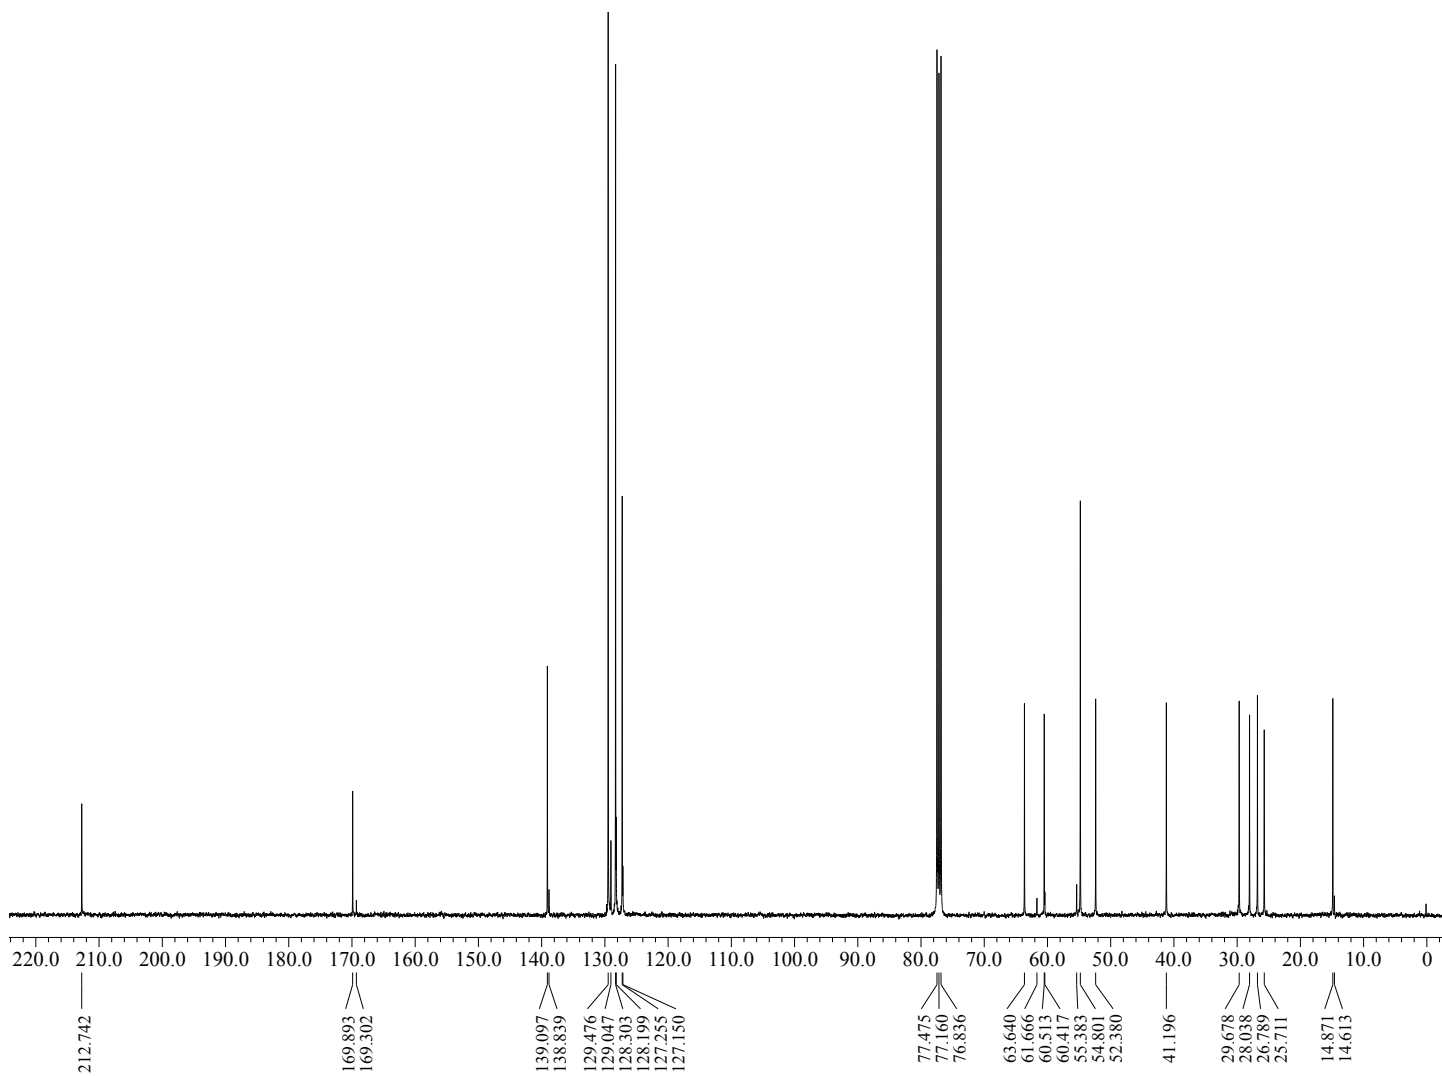

X: parts per Million: <sup>13</sup>C

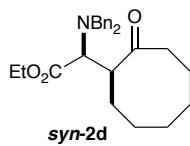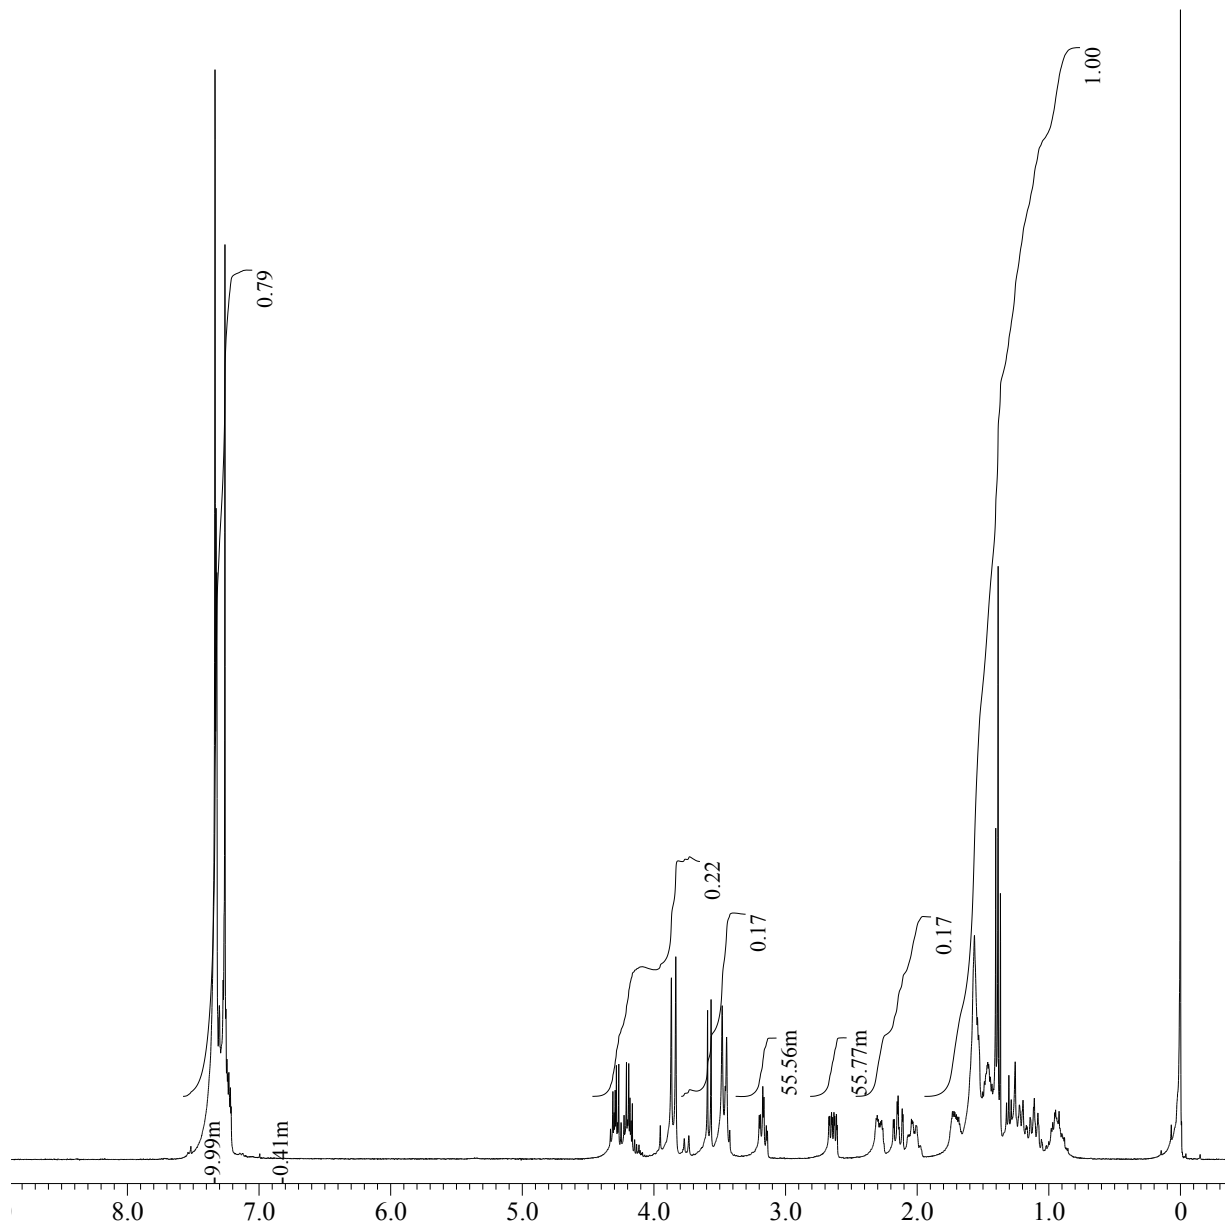

X: parts per Million: 1H

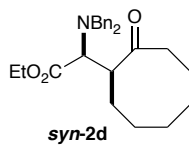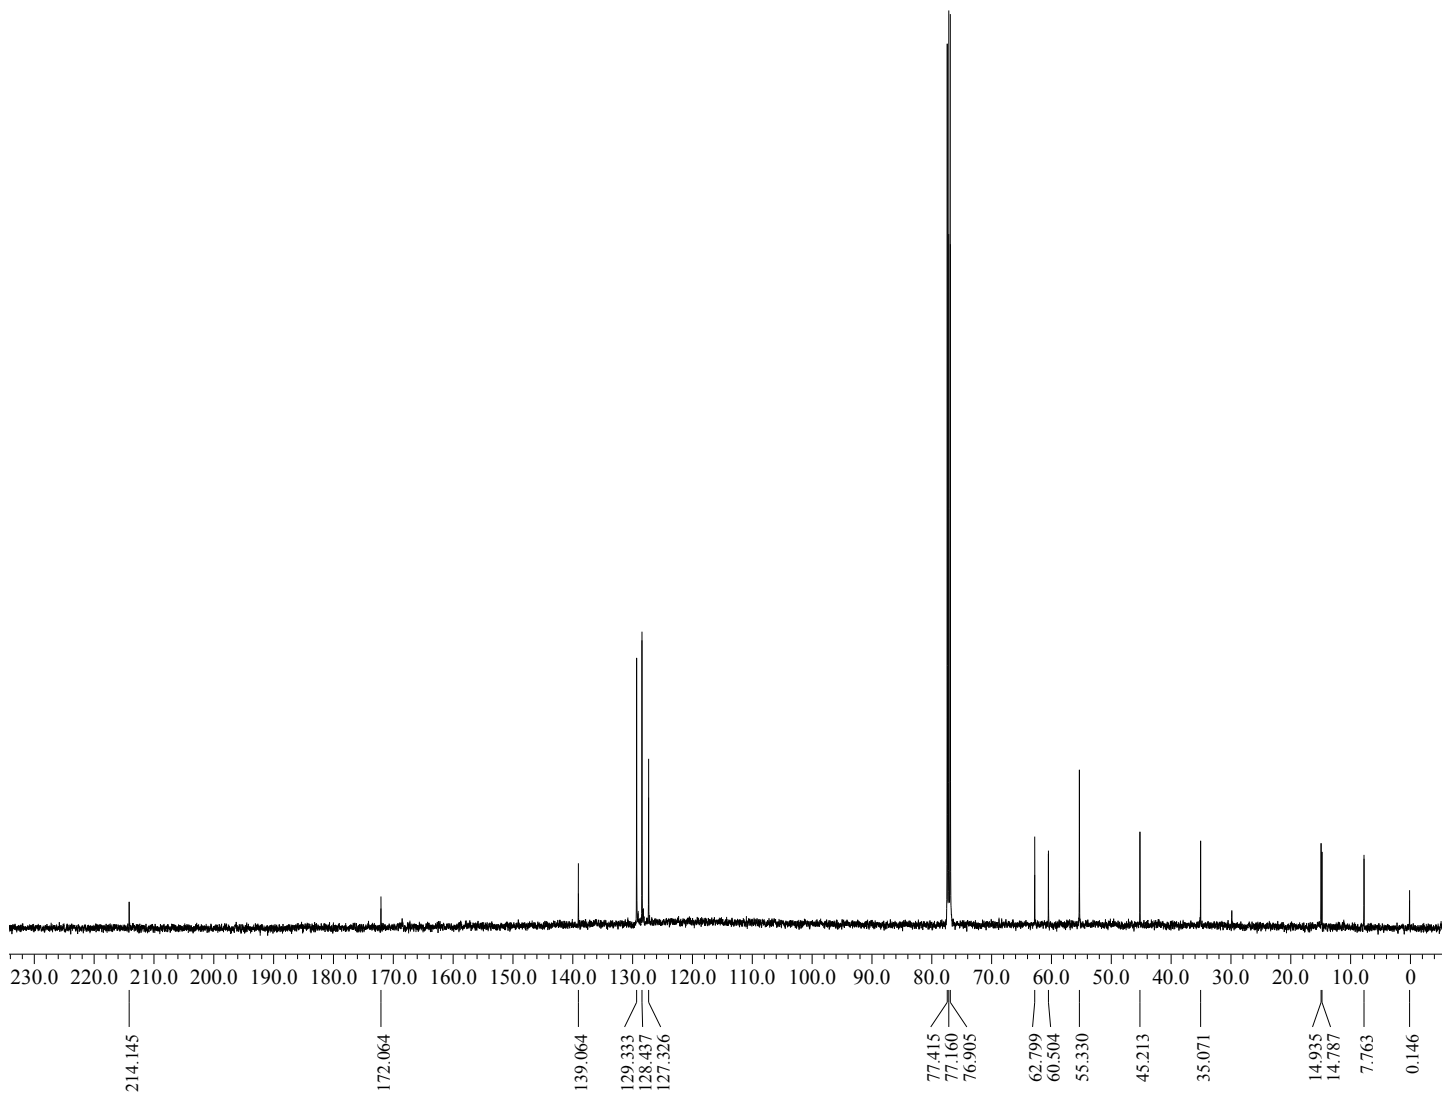

X: parts per Million: 13C

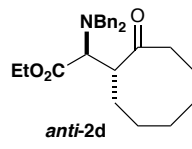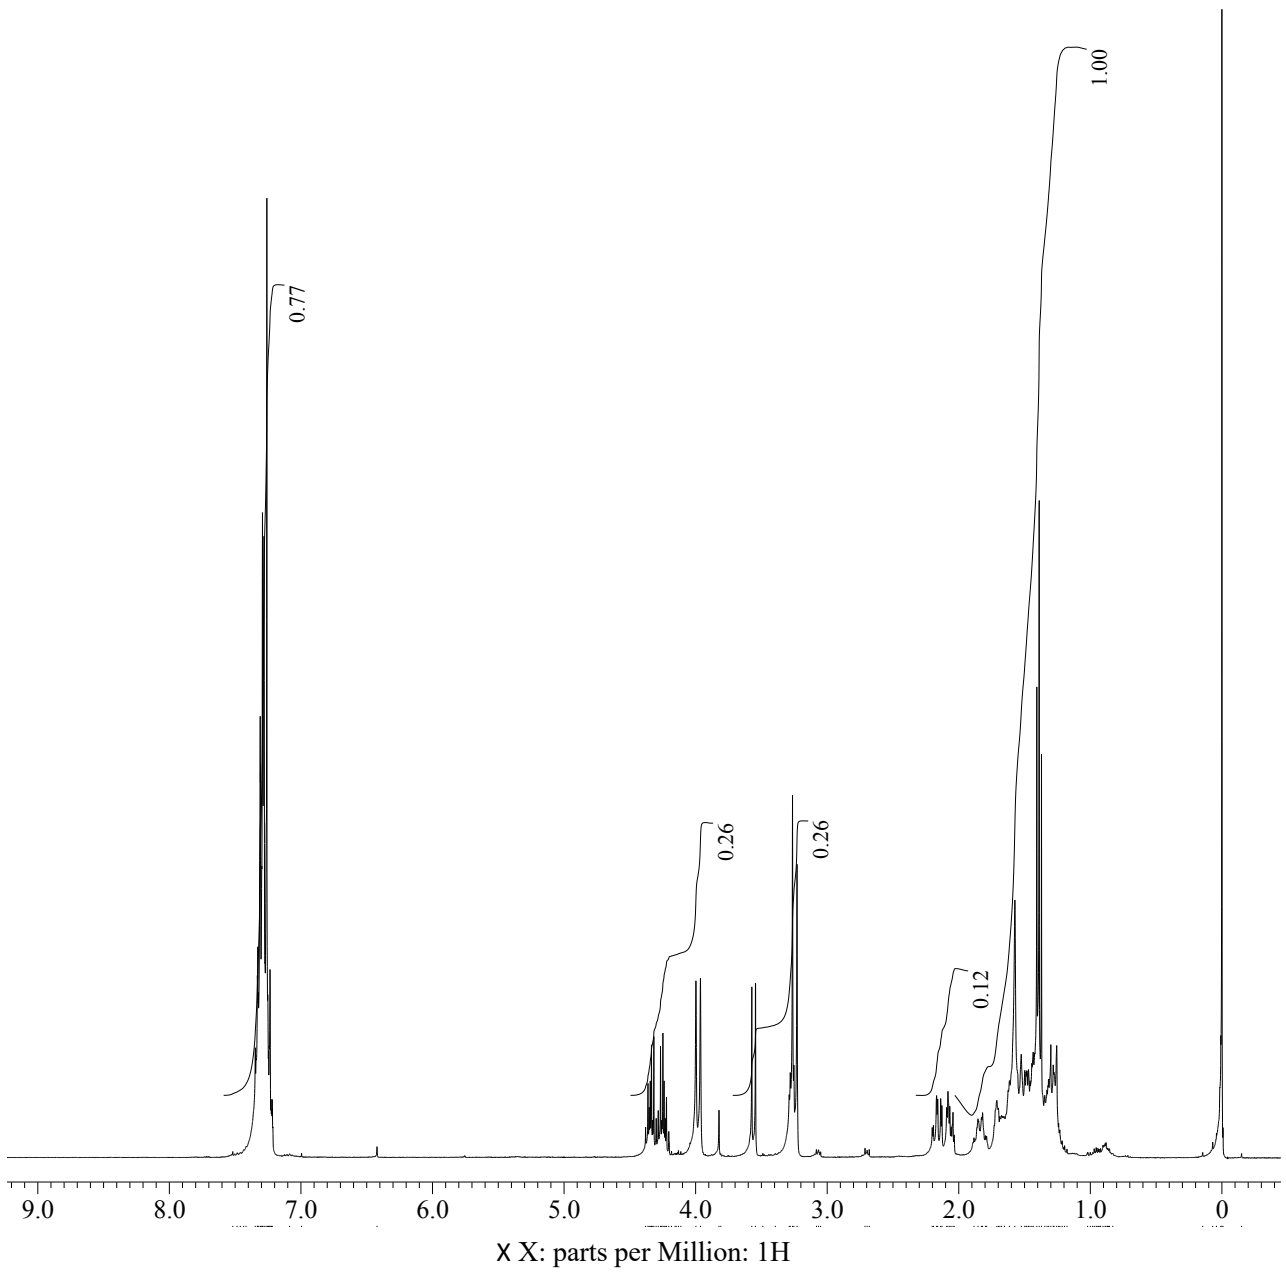

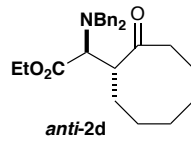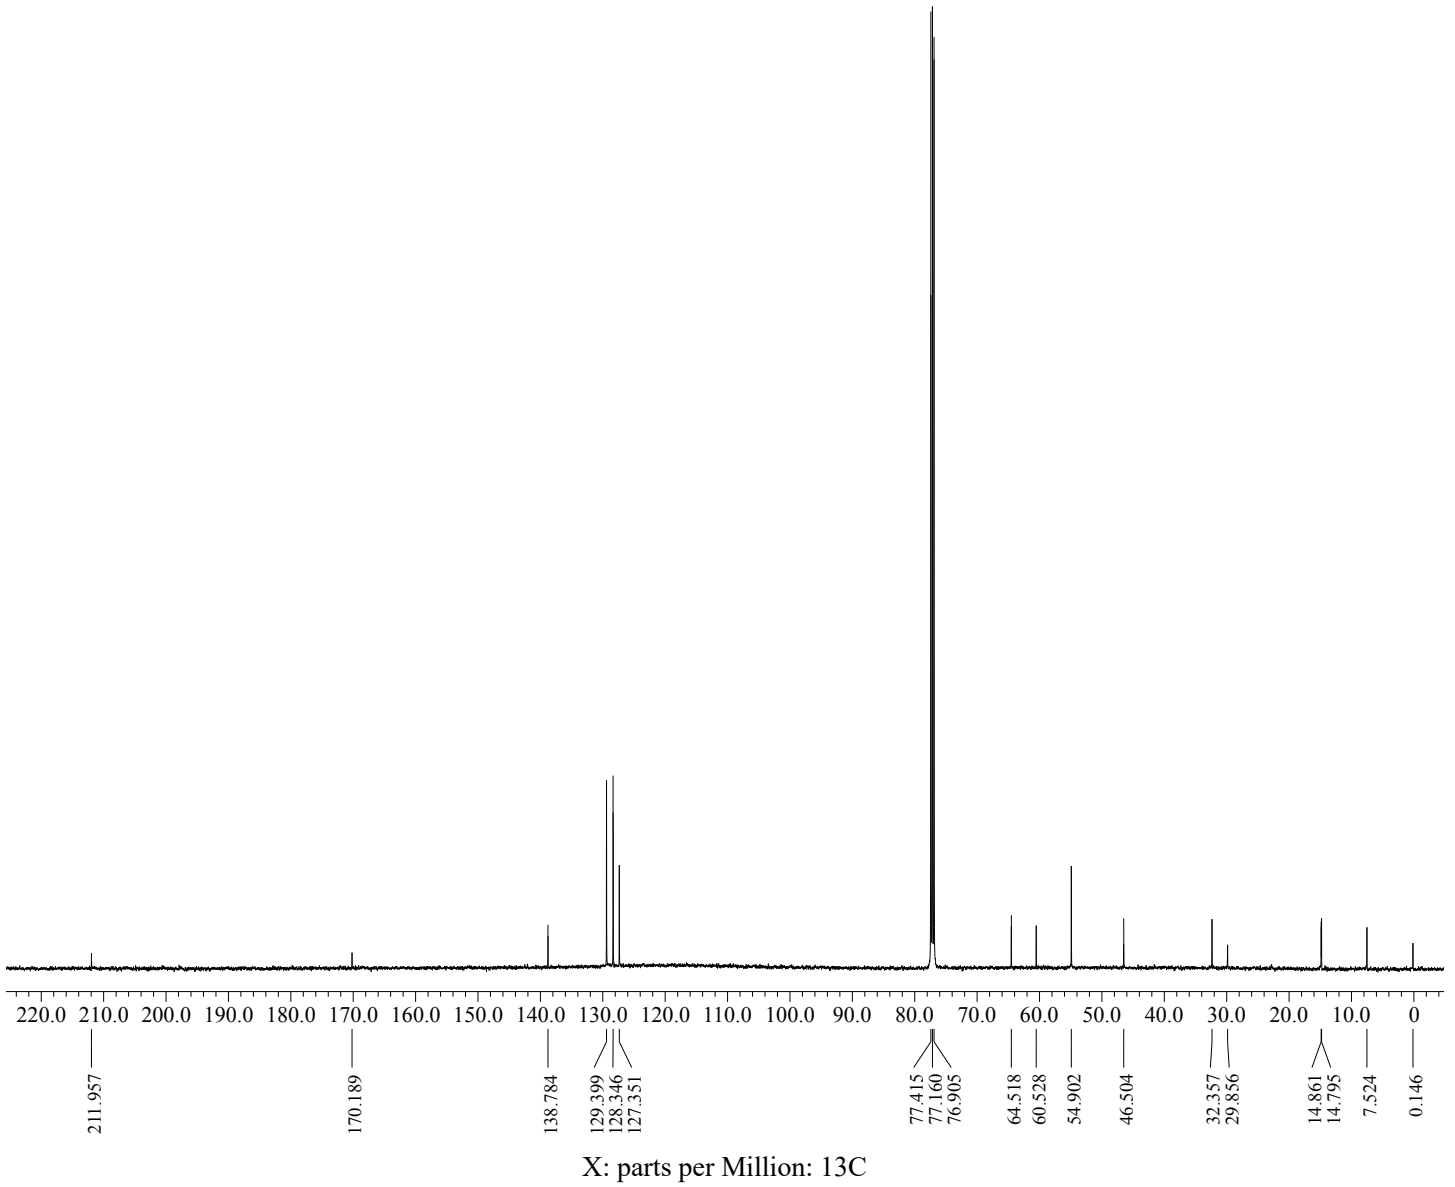

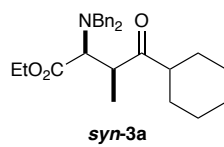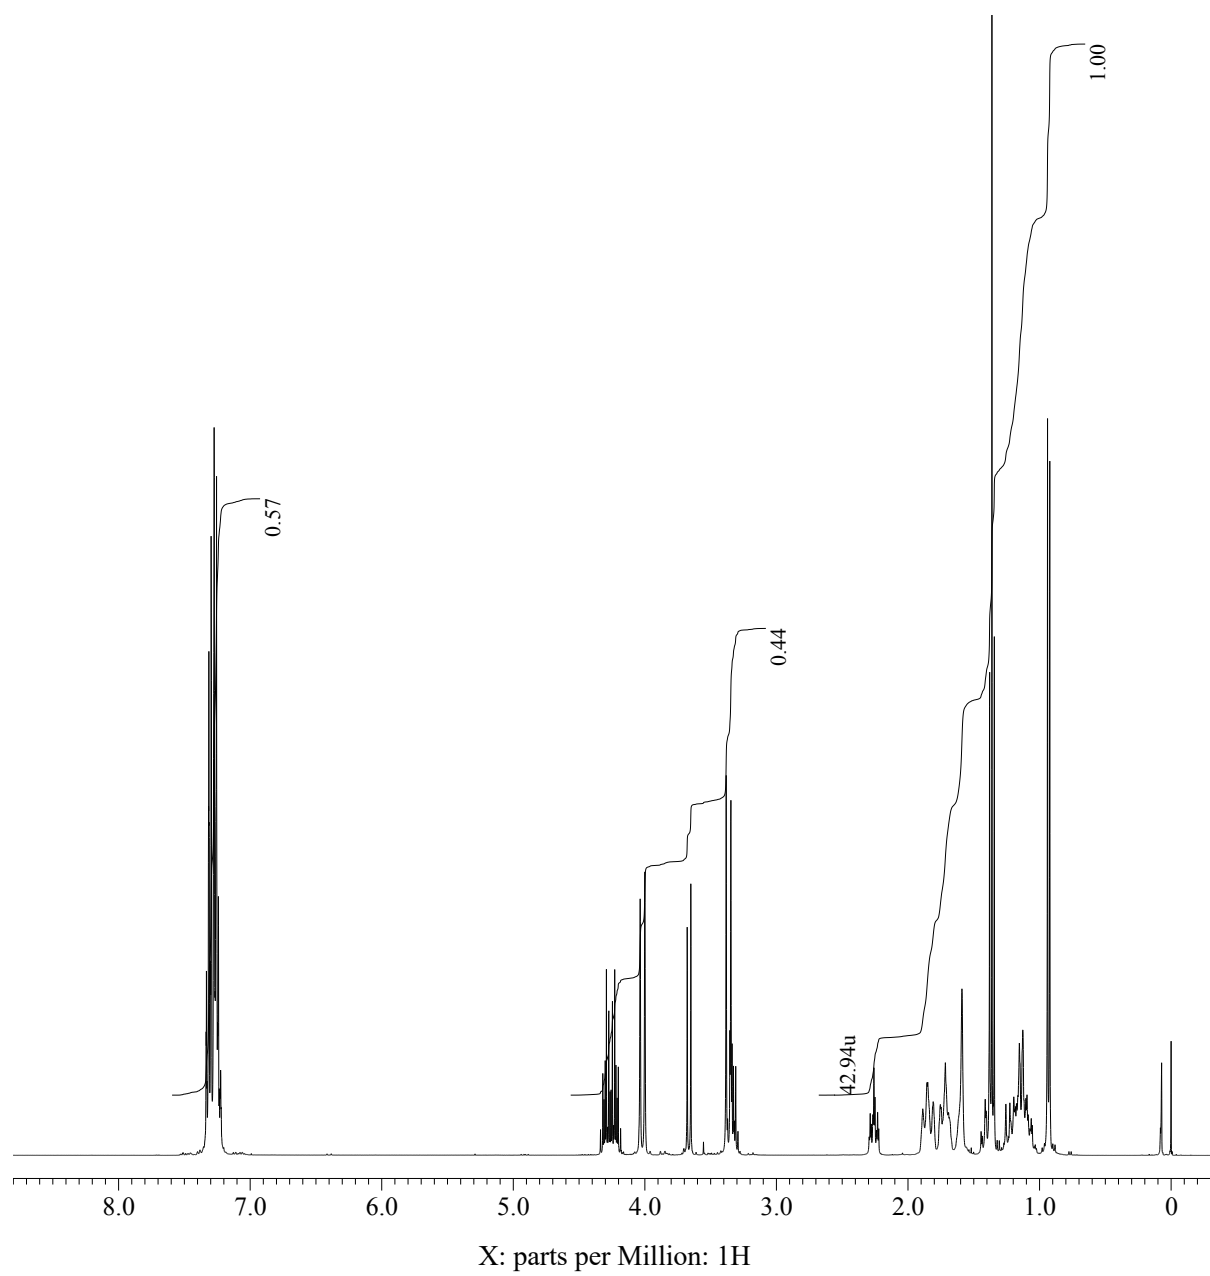



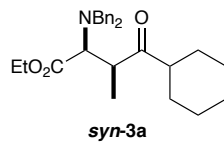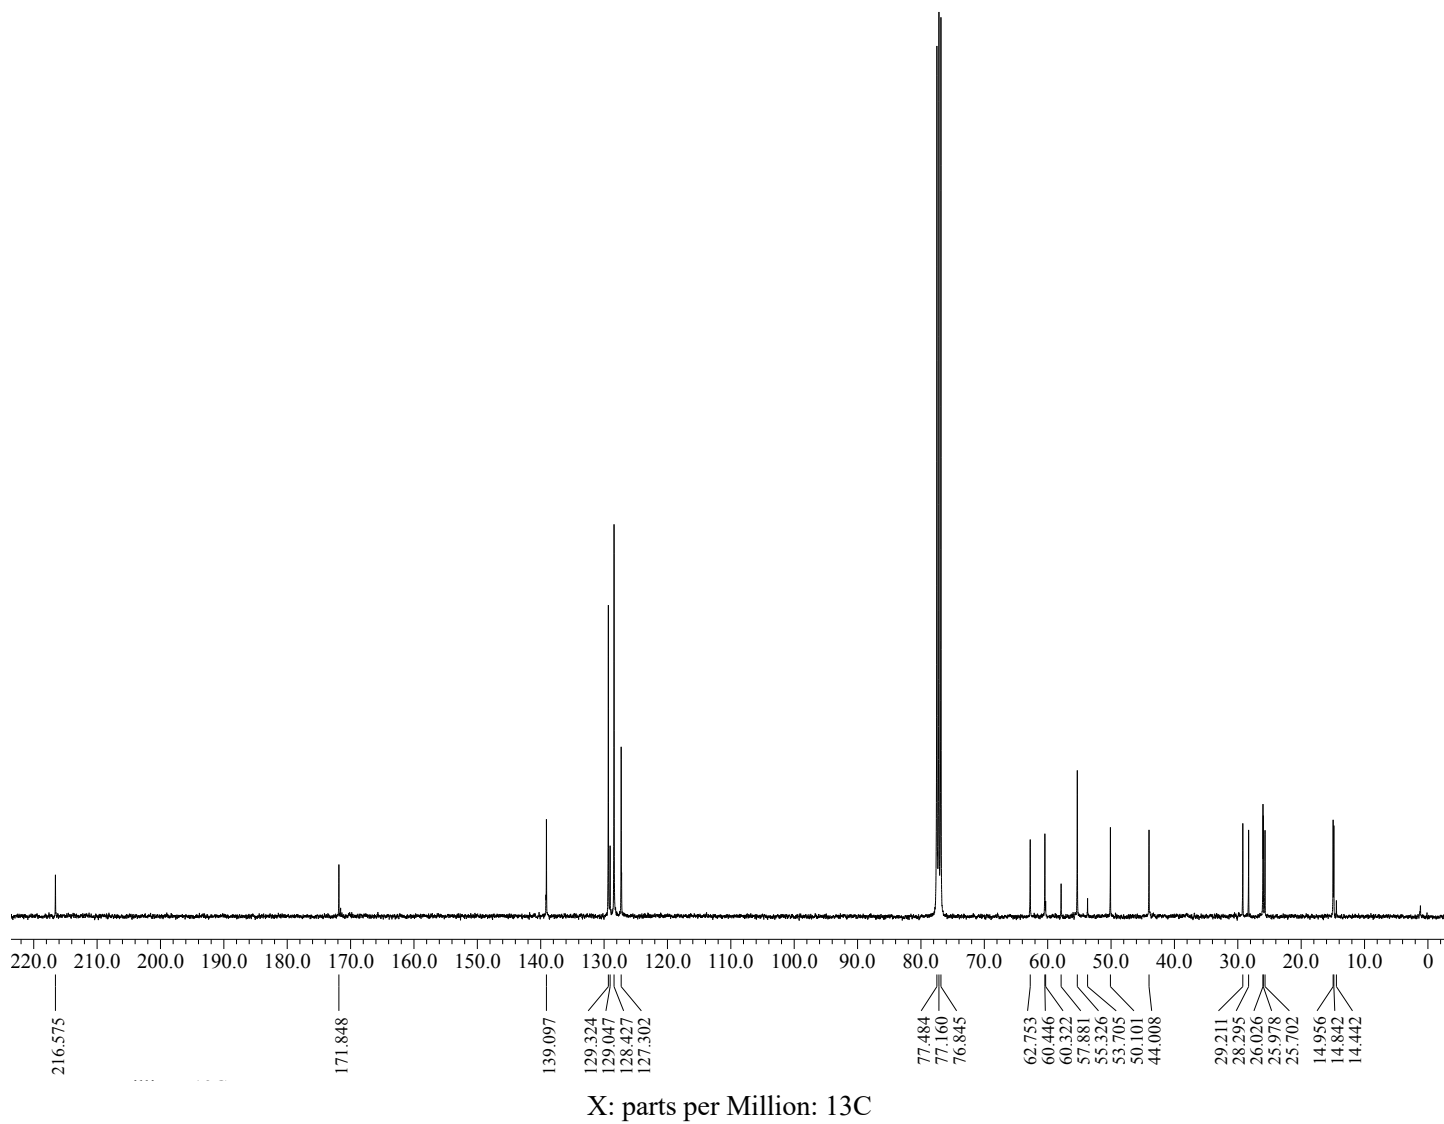

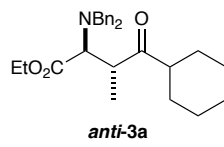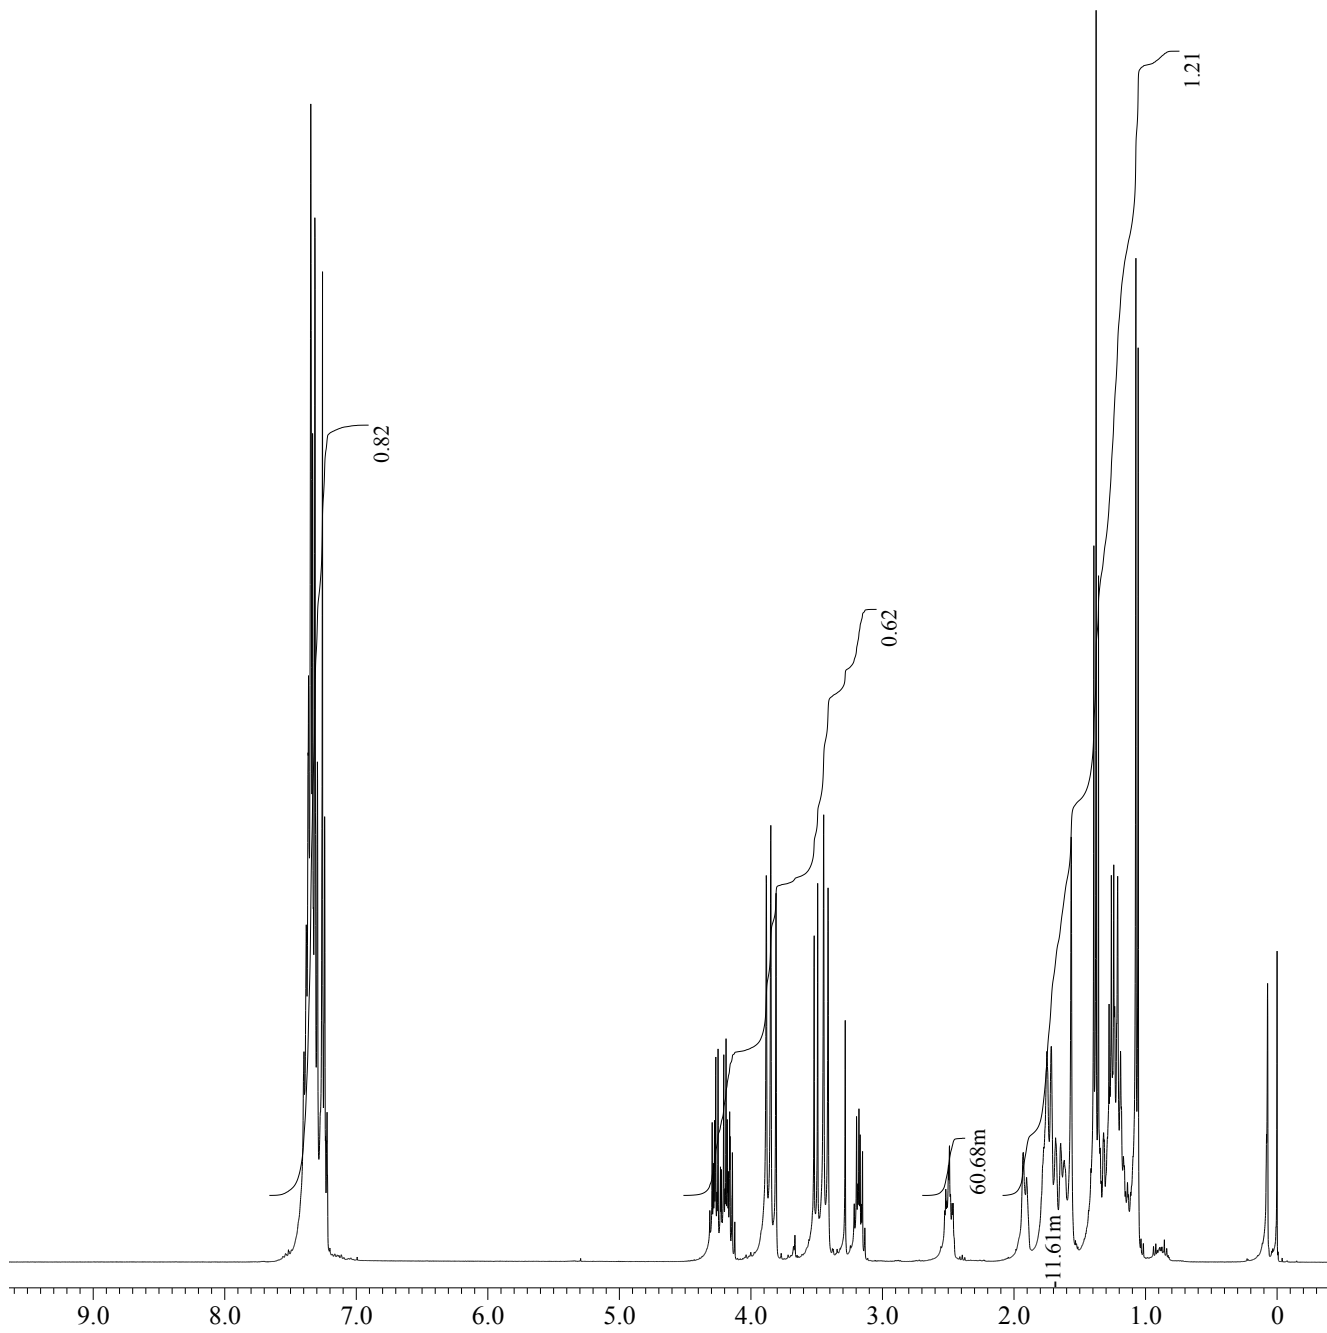

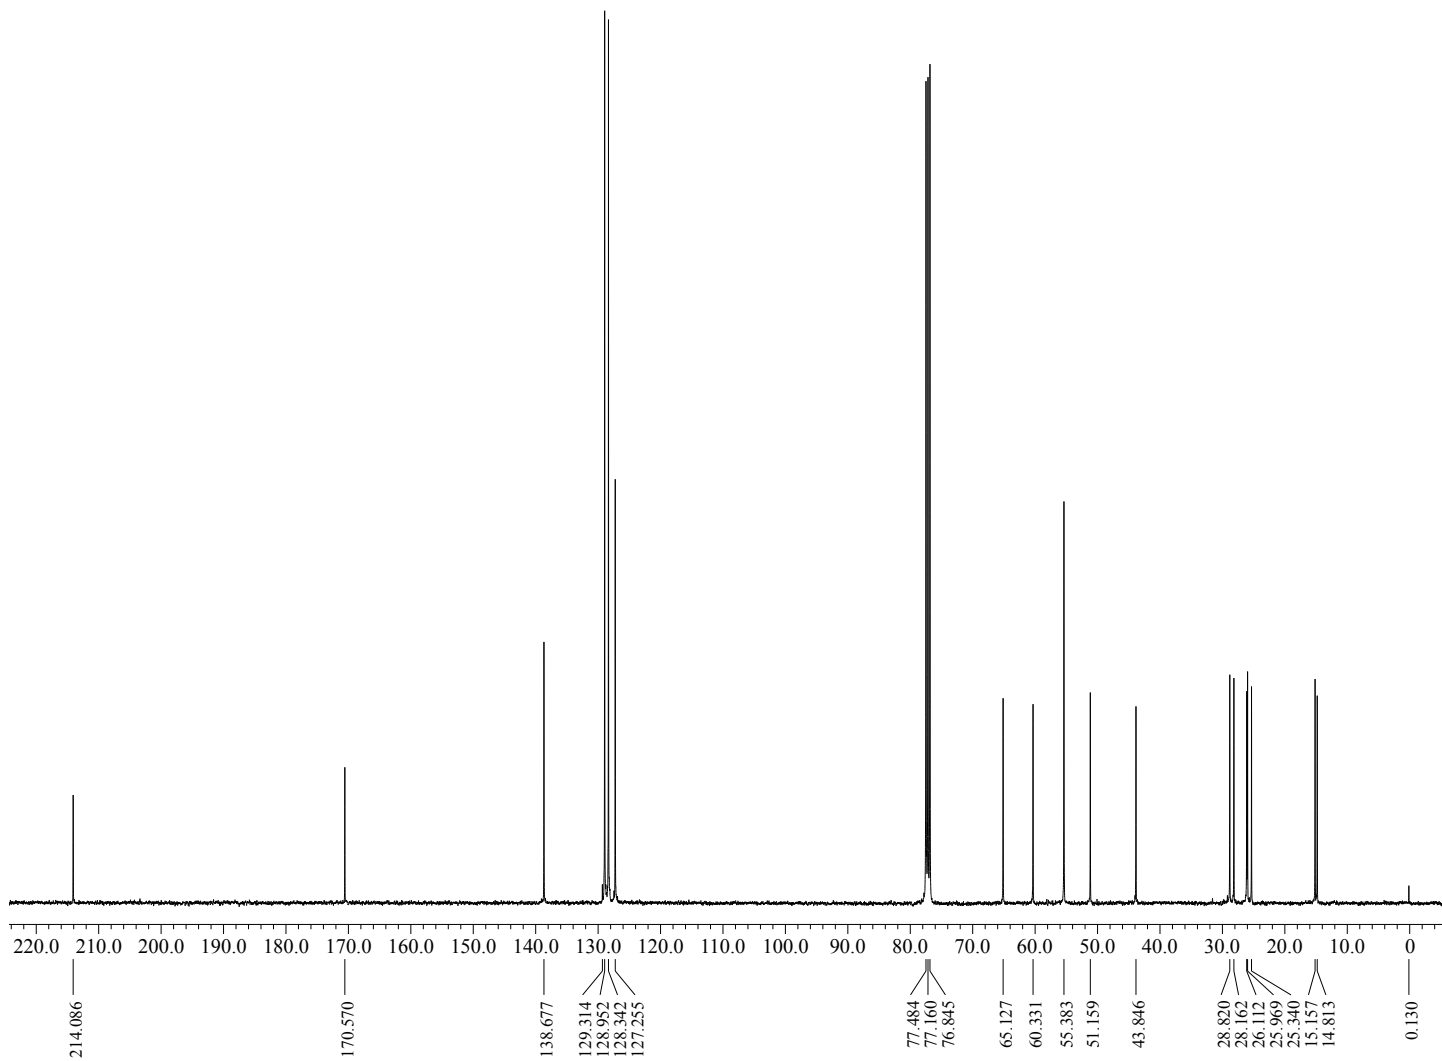

X: parts per Million: 13C

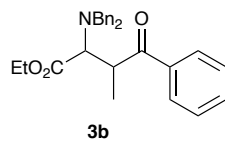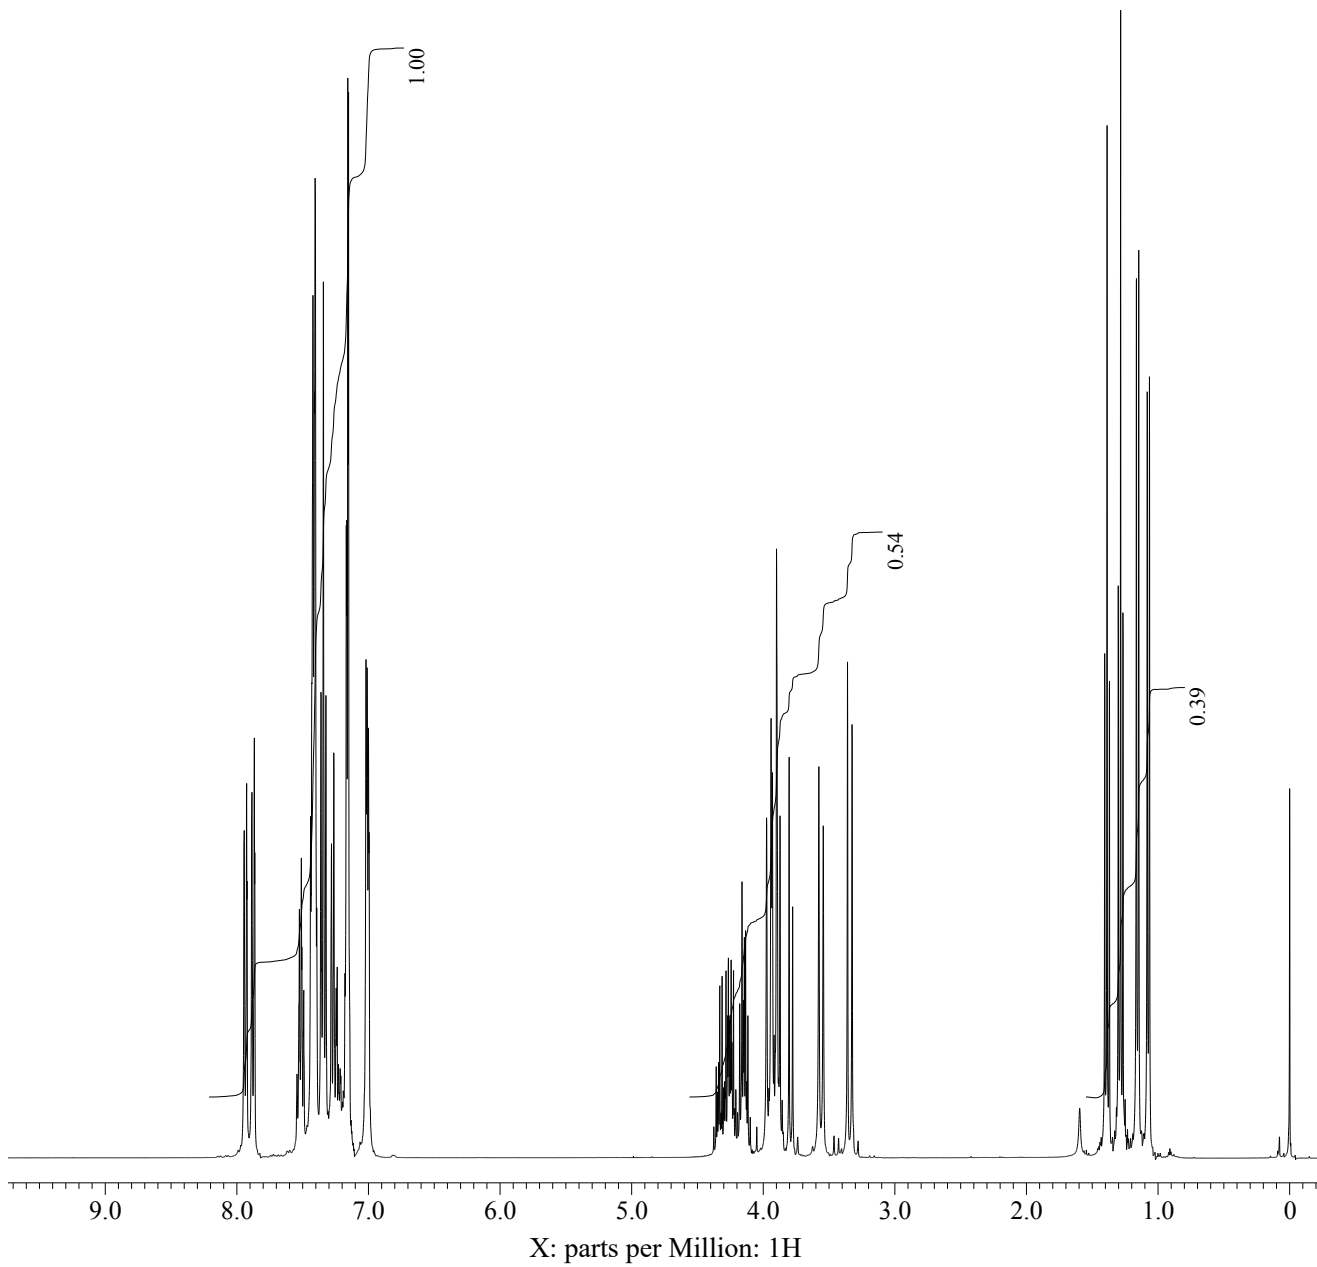

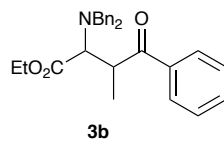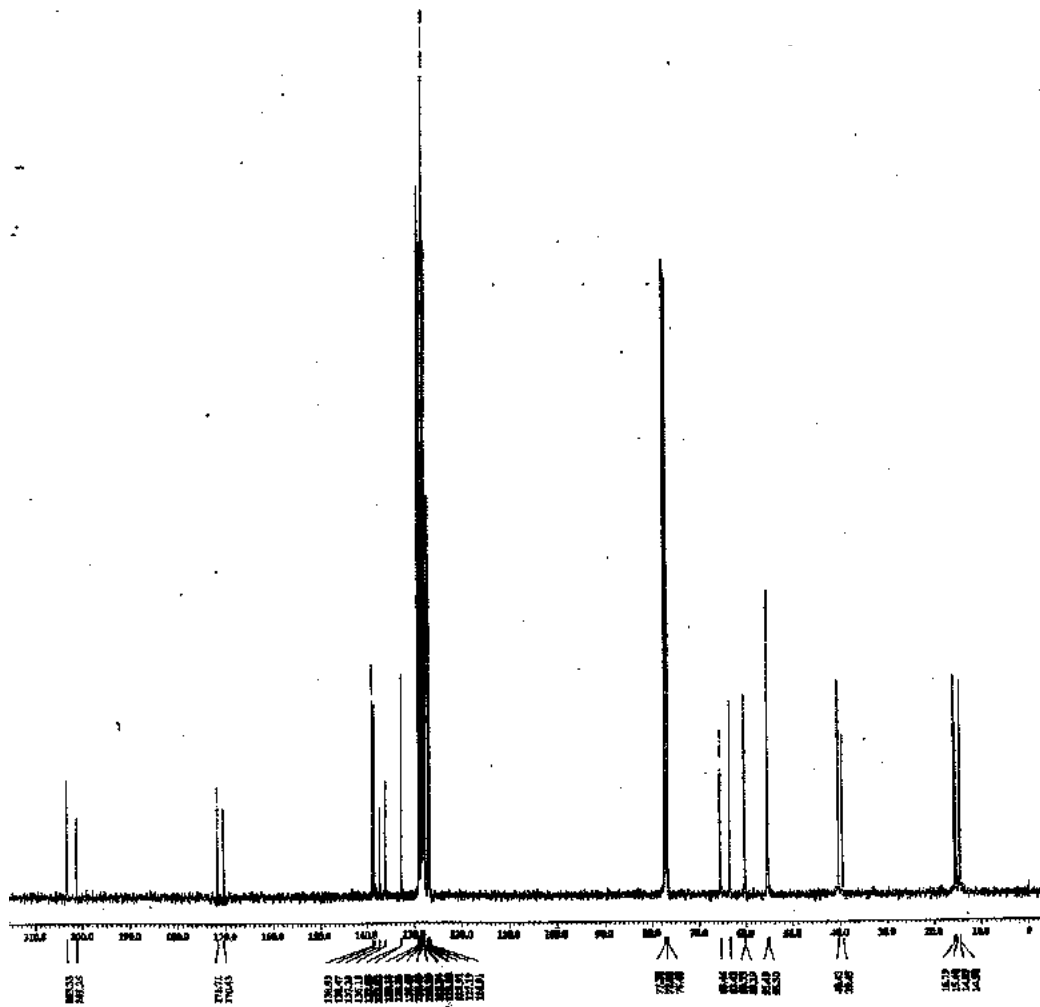

X: parts per Million: 13C

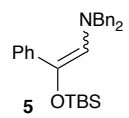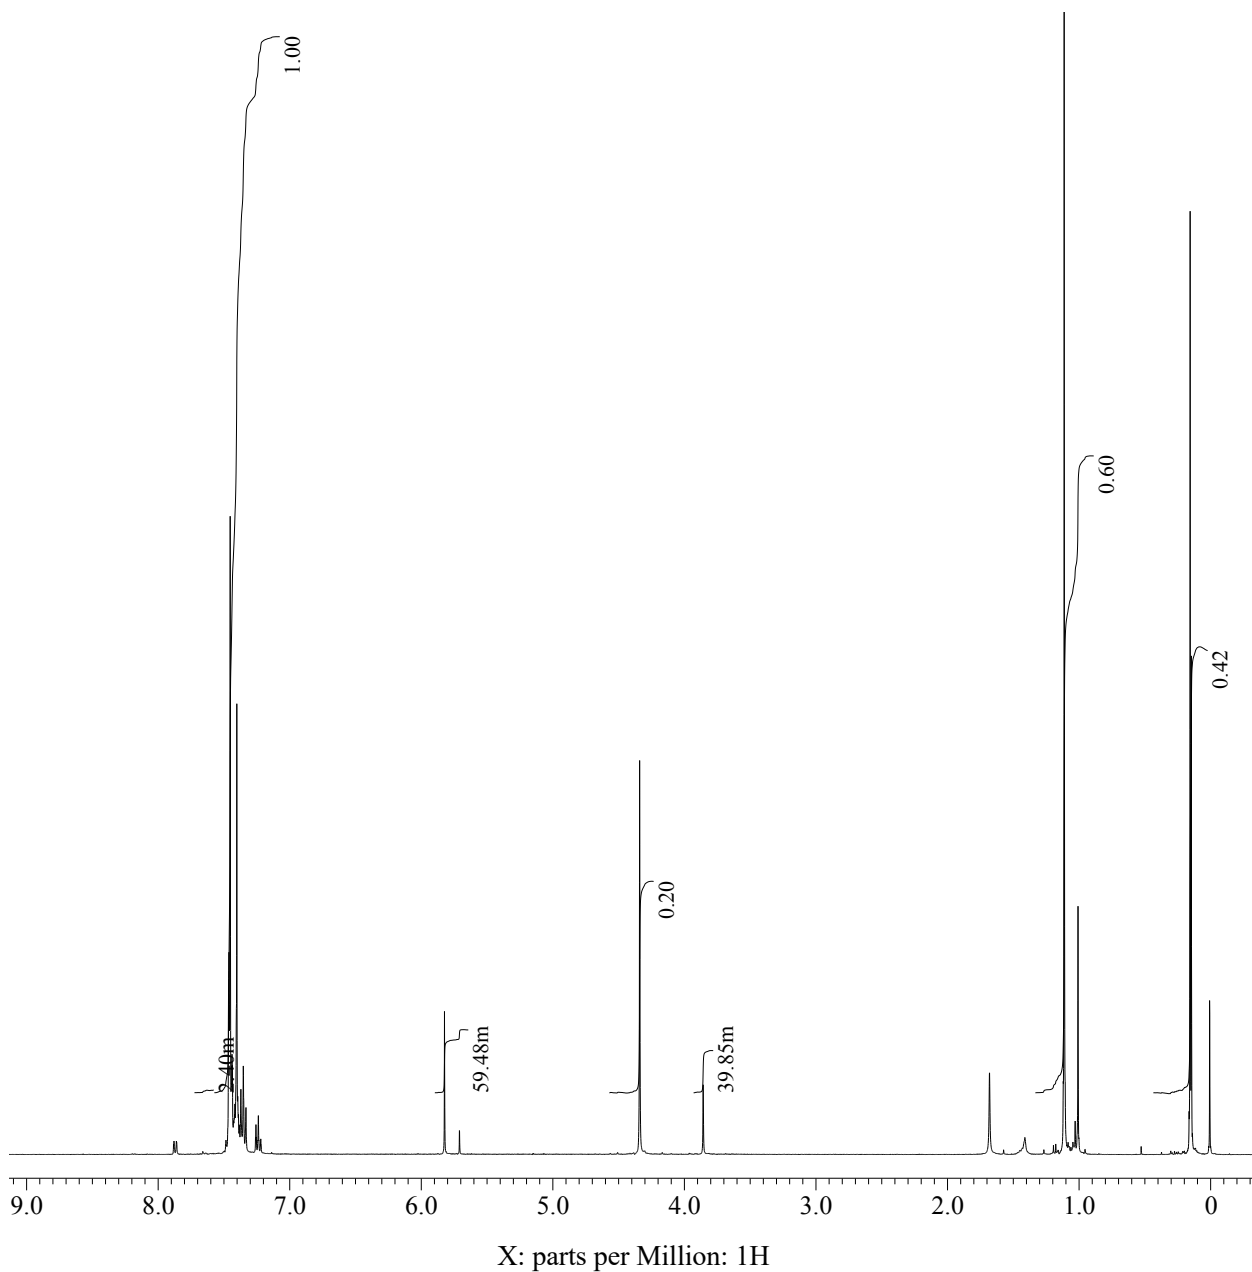

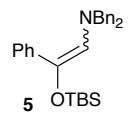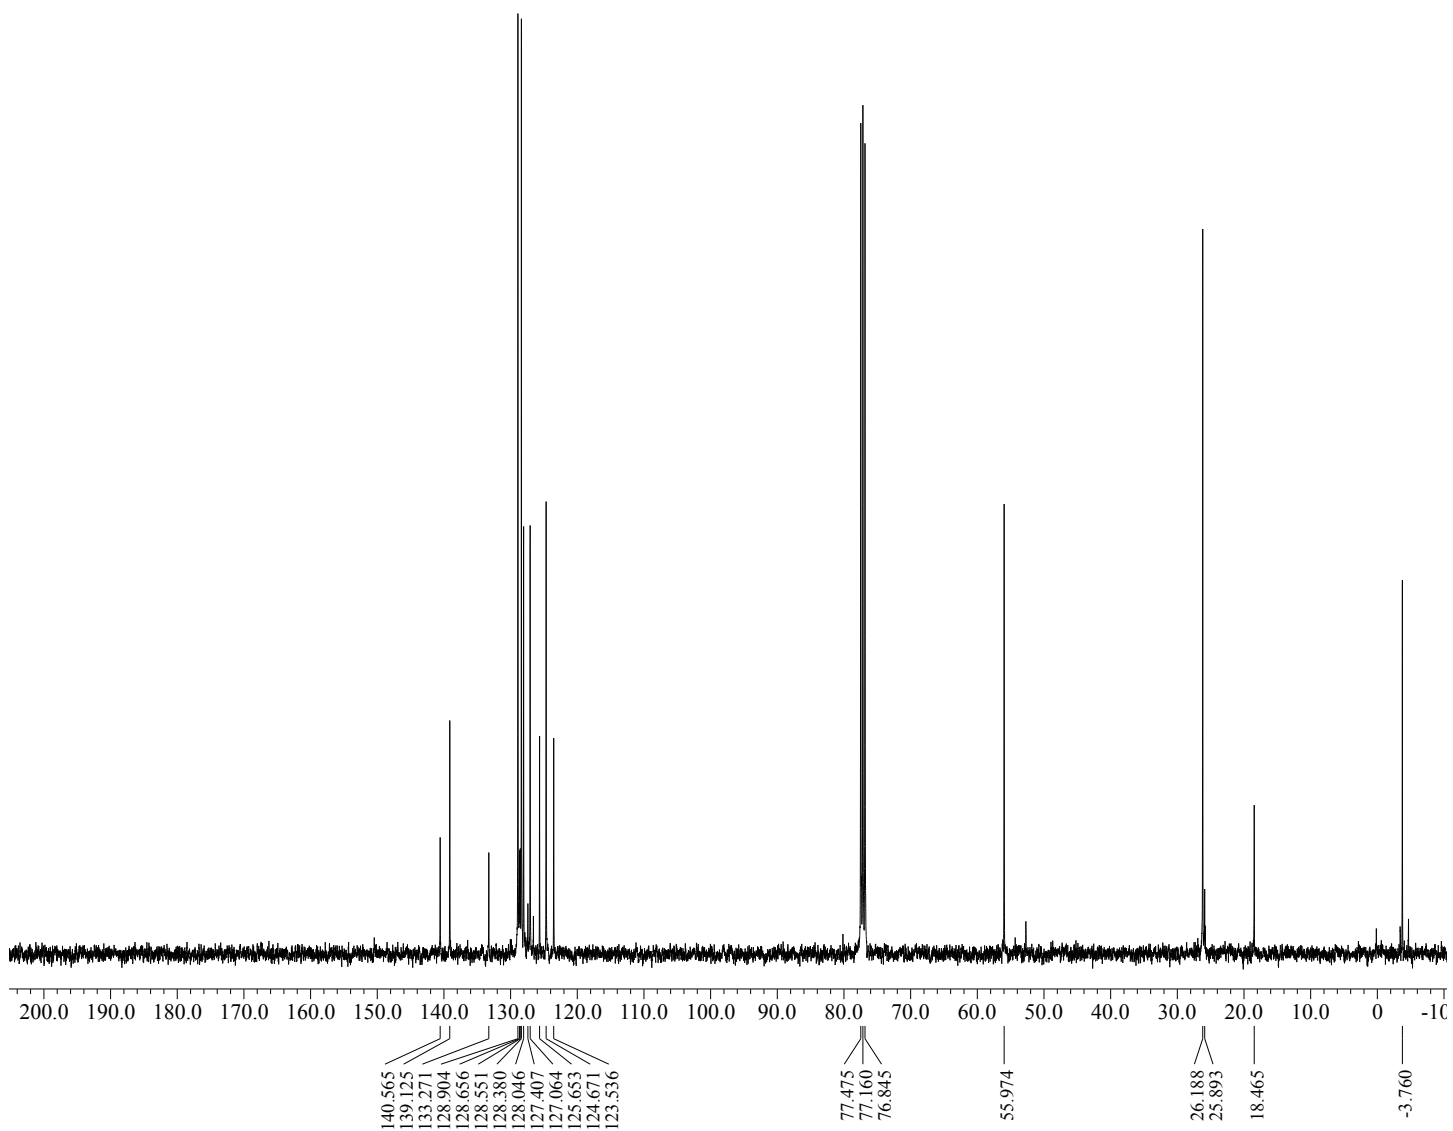

X: parts per Million: <sup>13</sup>C

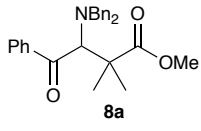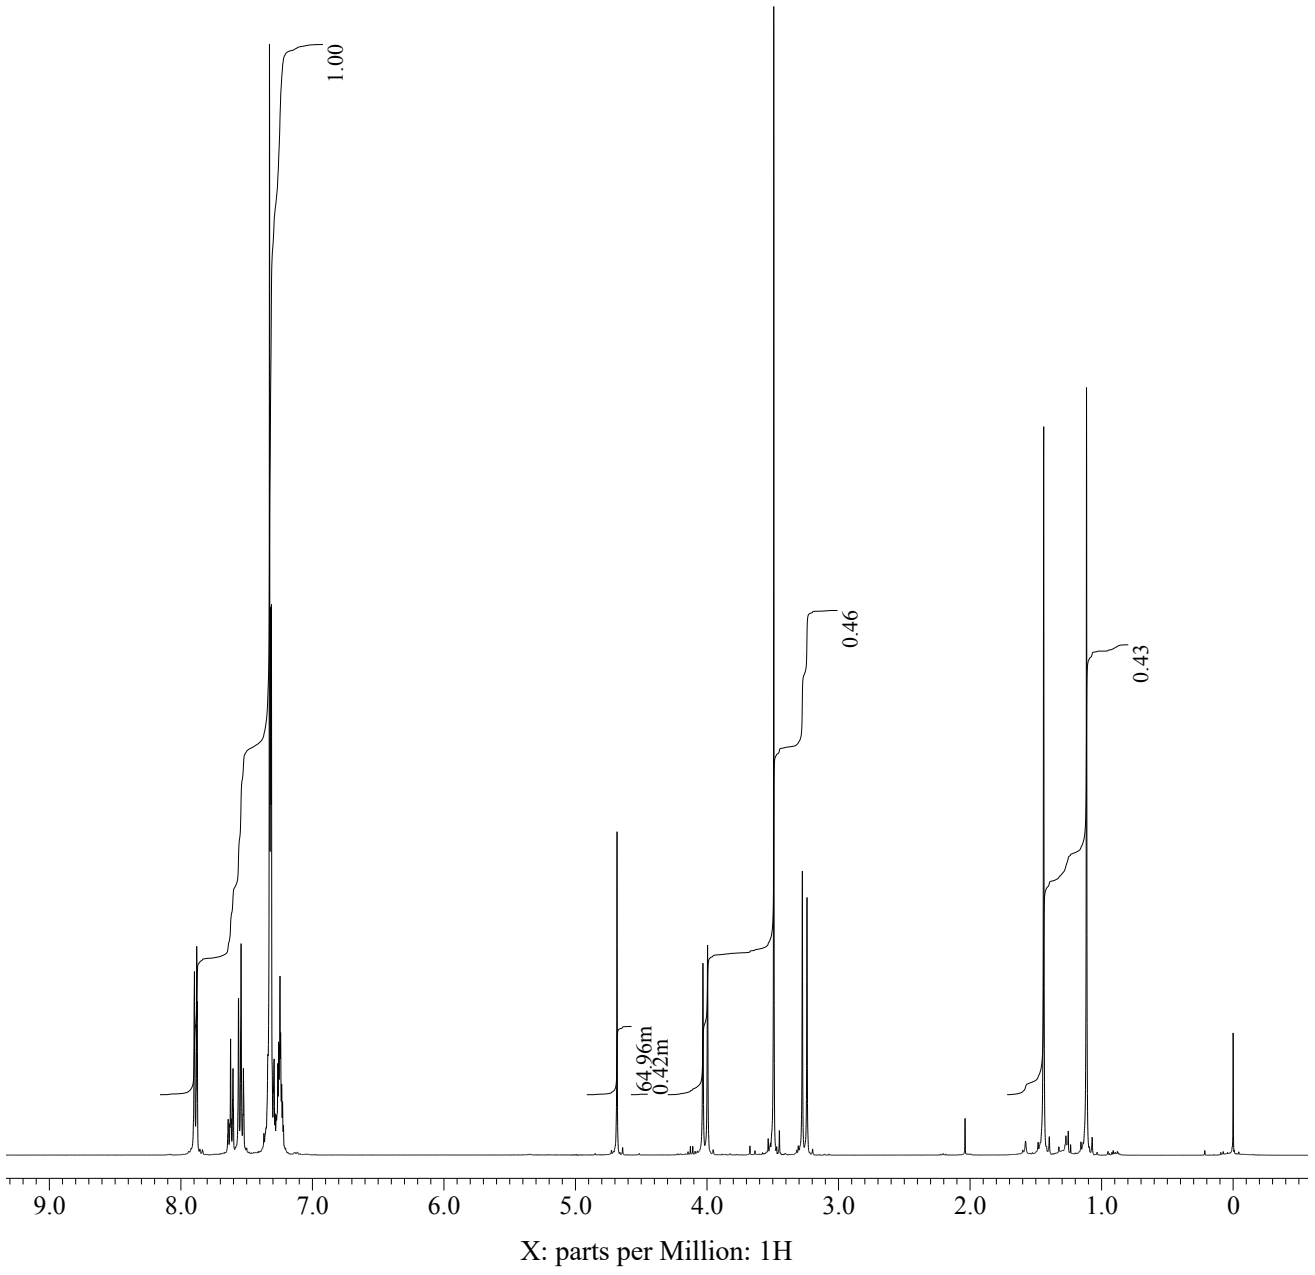



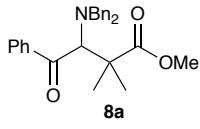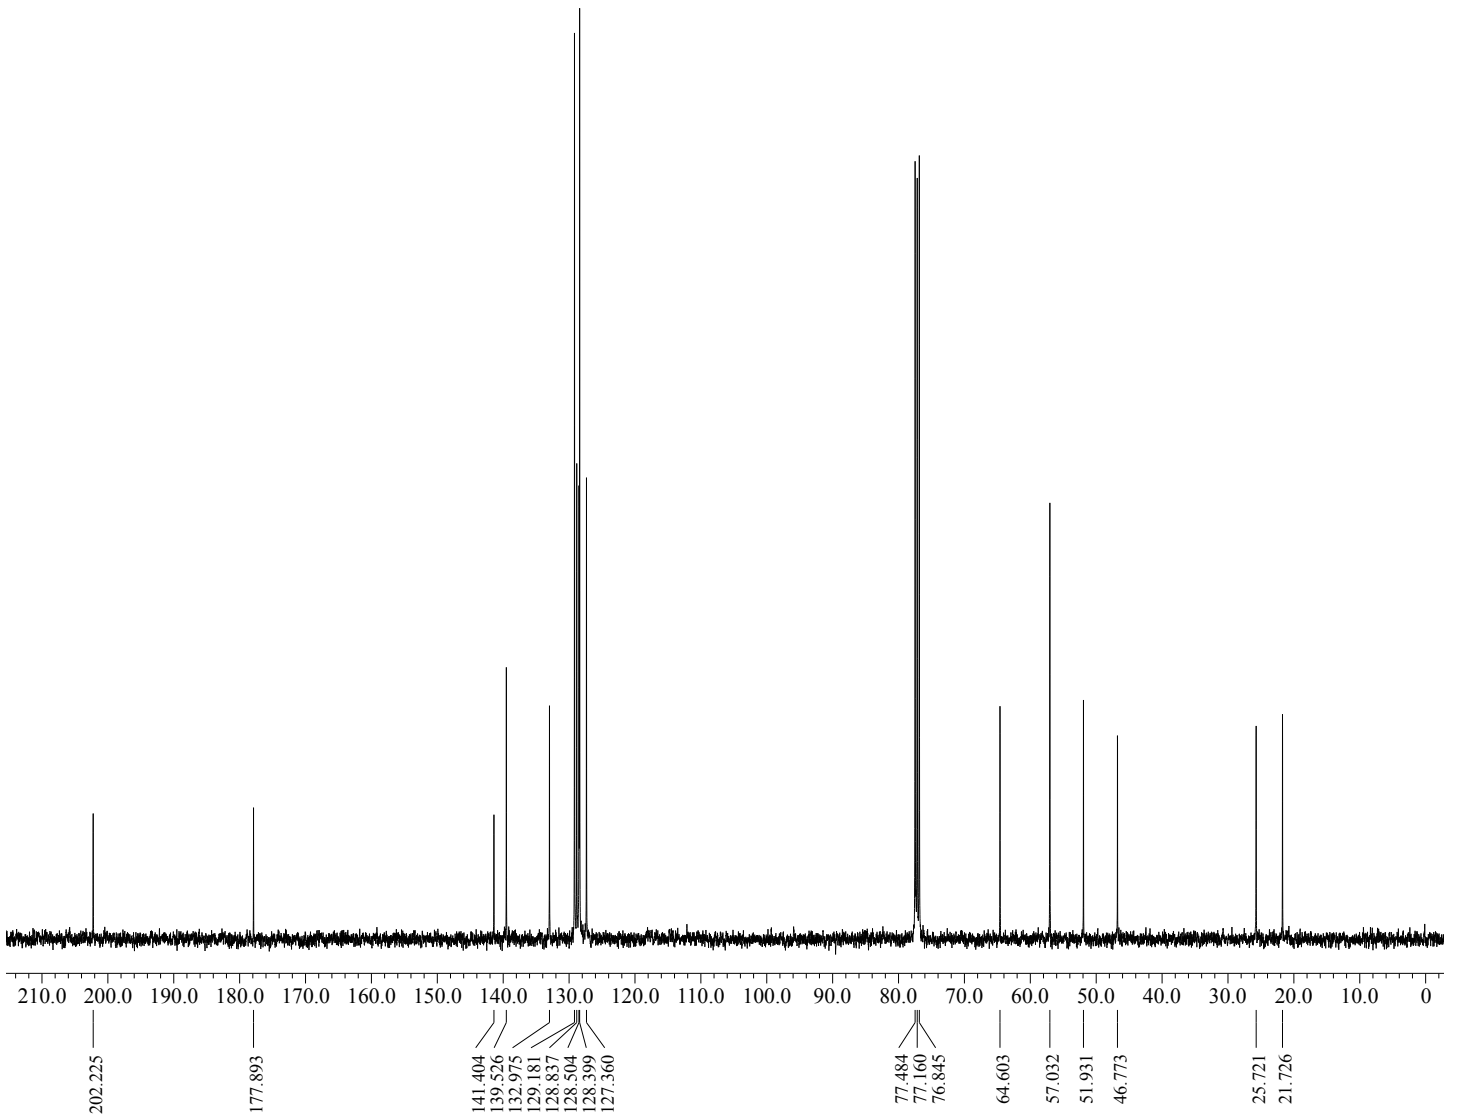

X: parts per Million: 13C

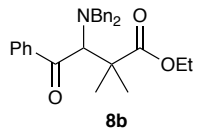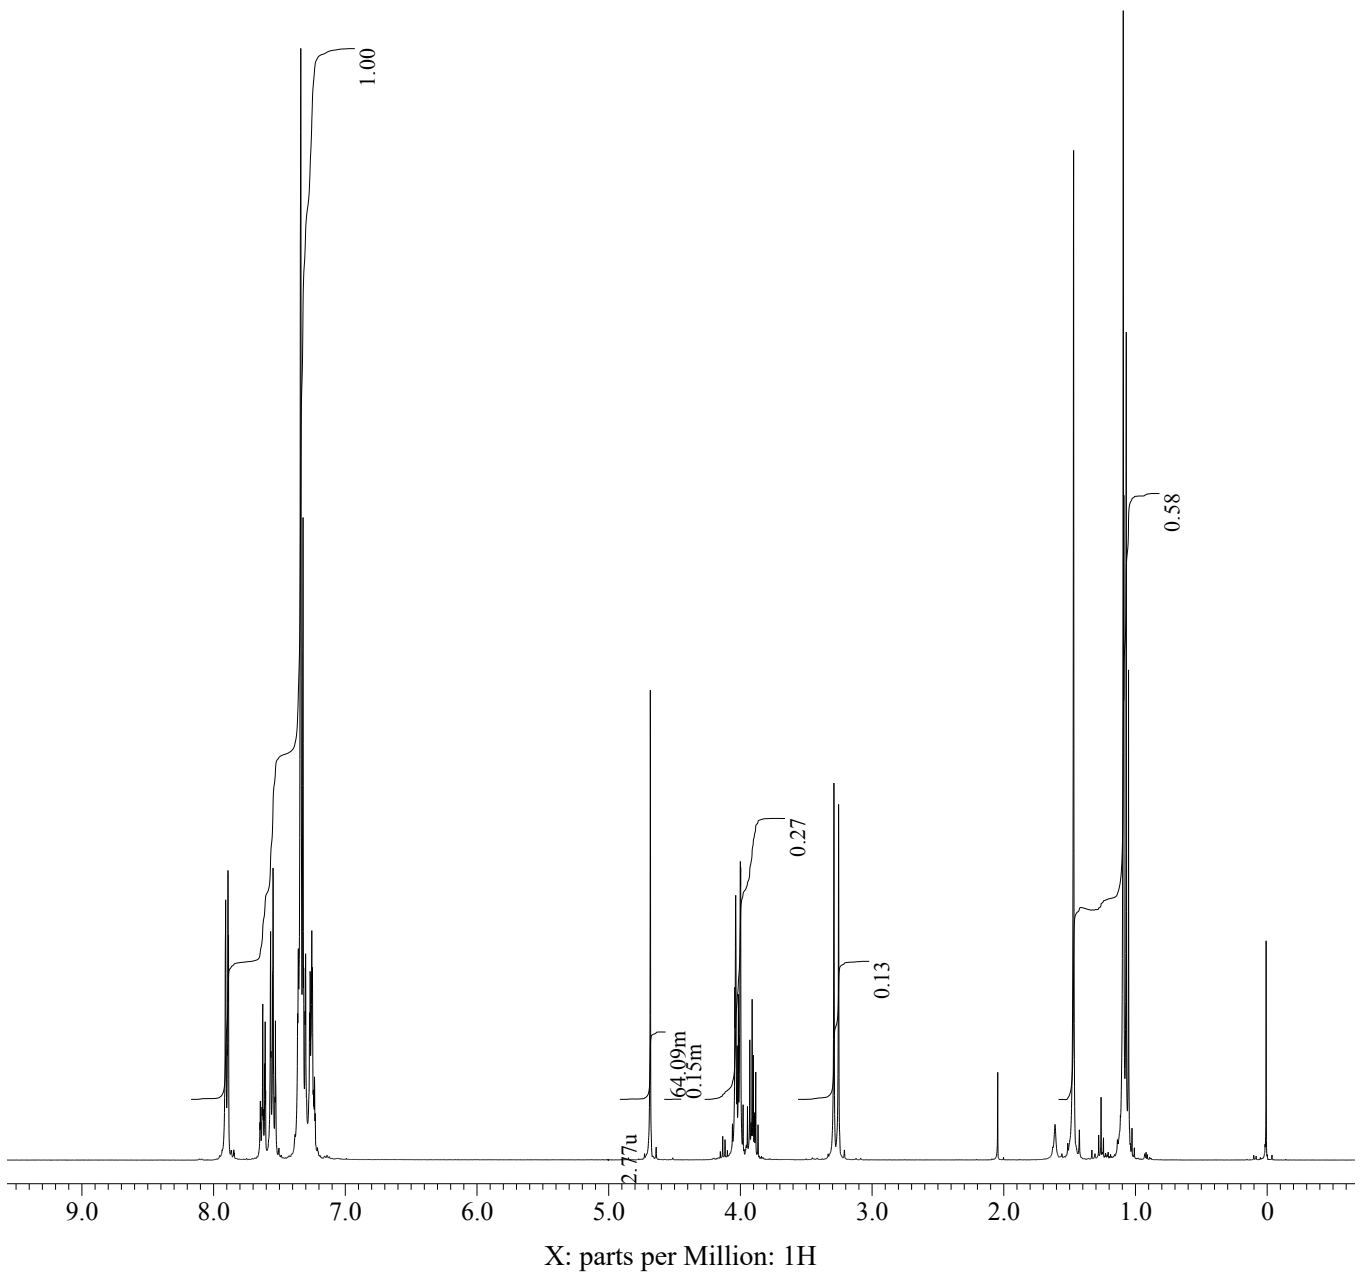

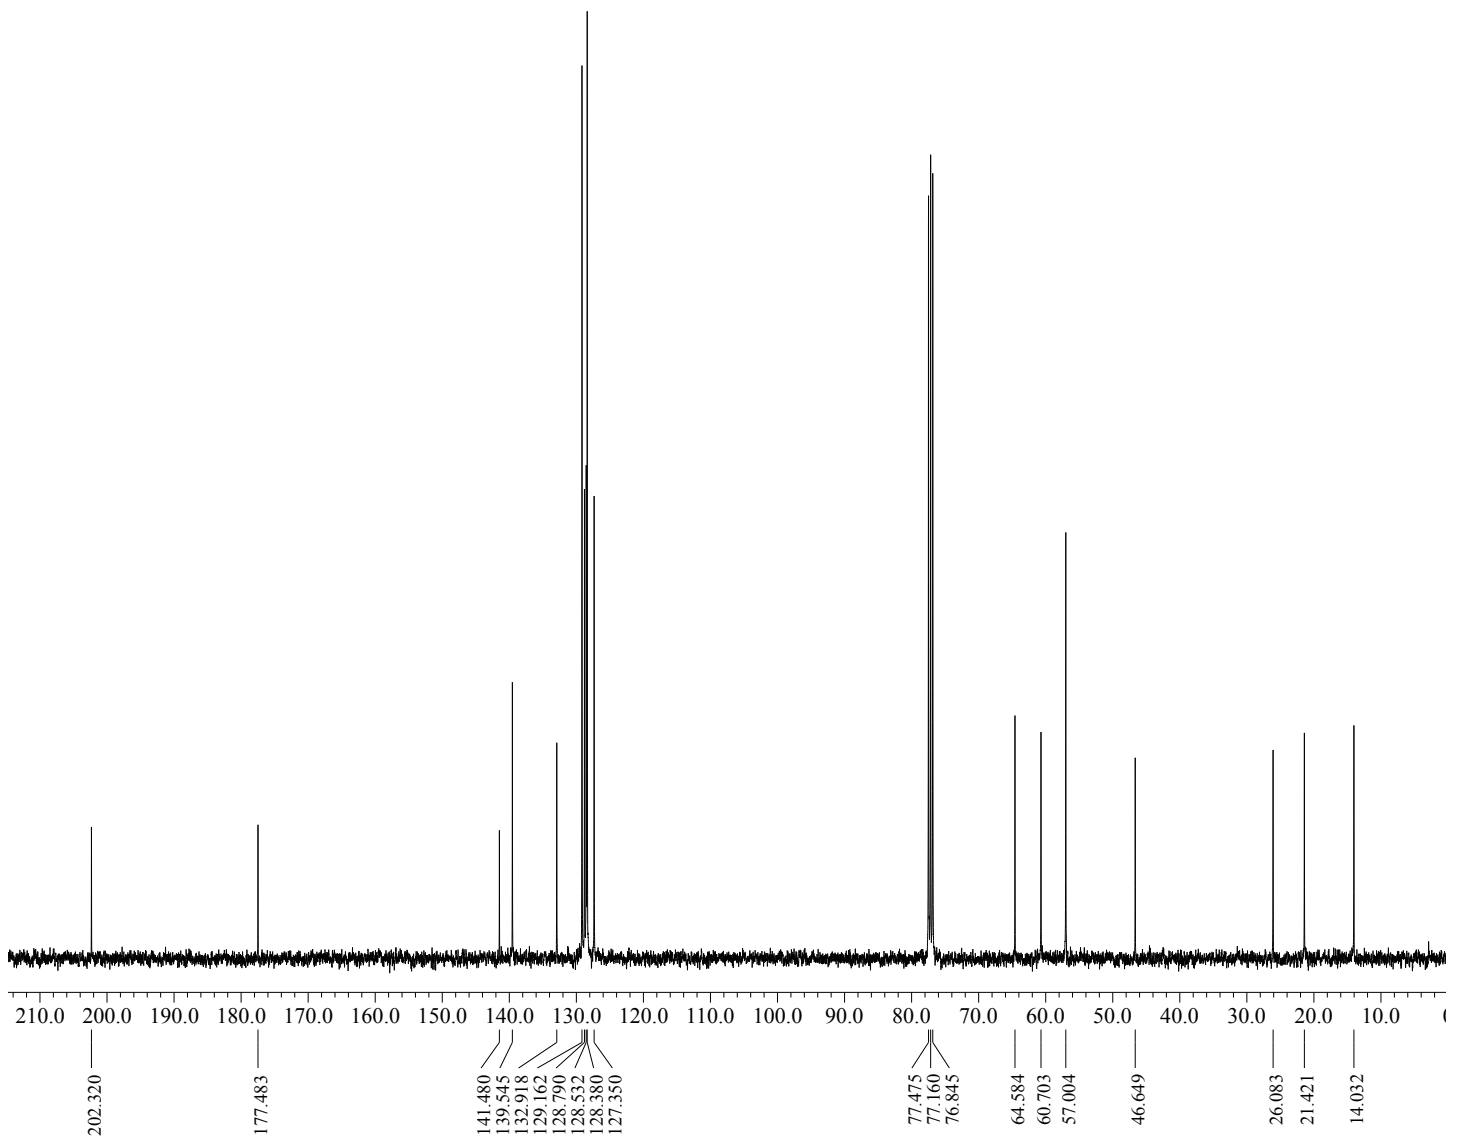

X: parts per Million: <sup>13</sup>C

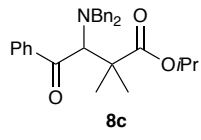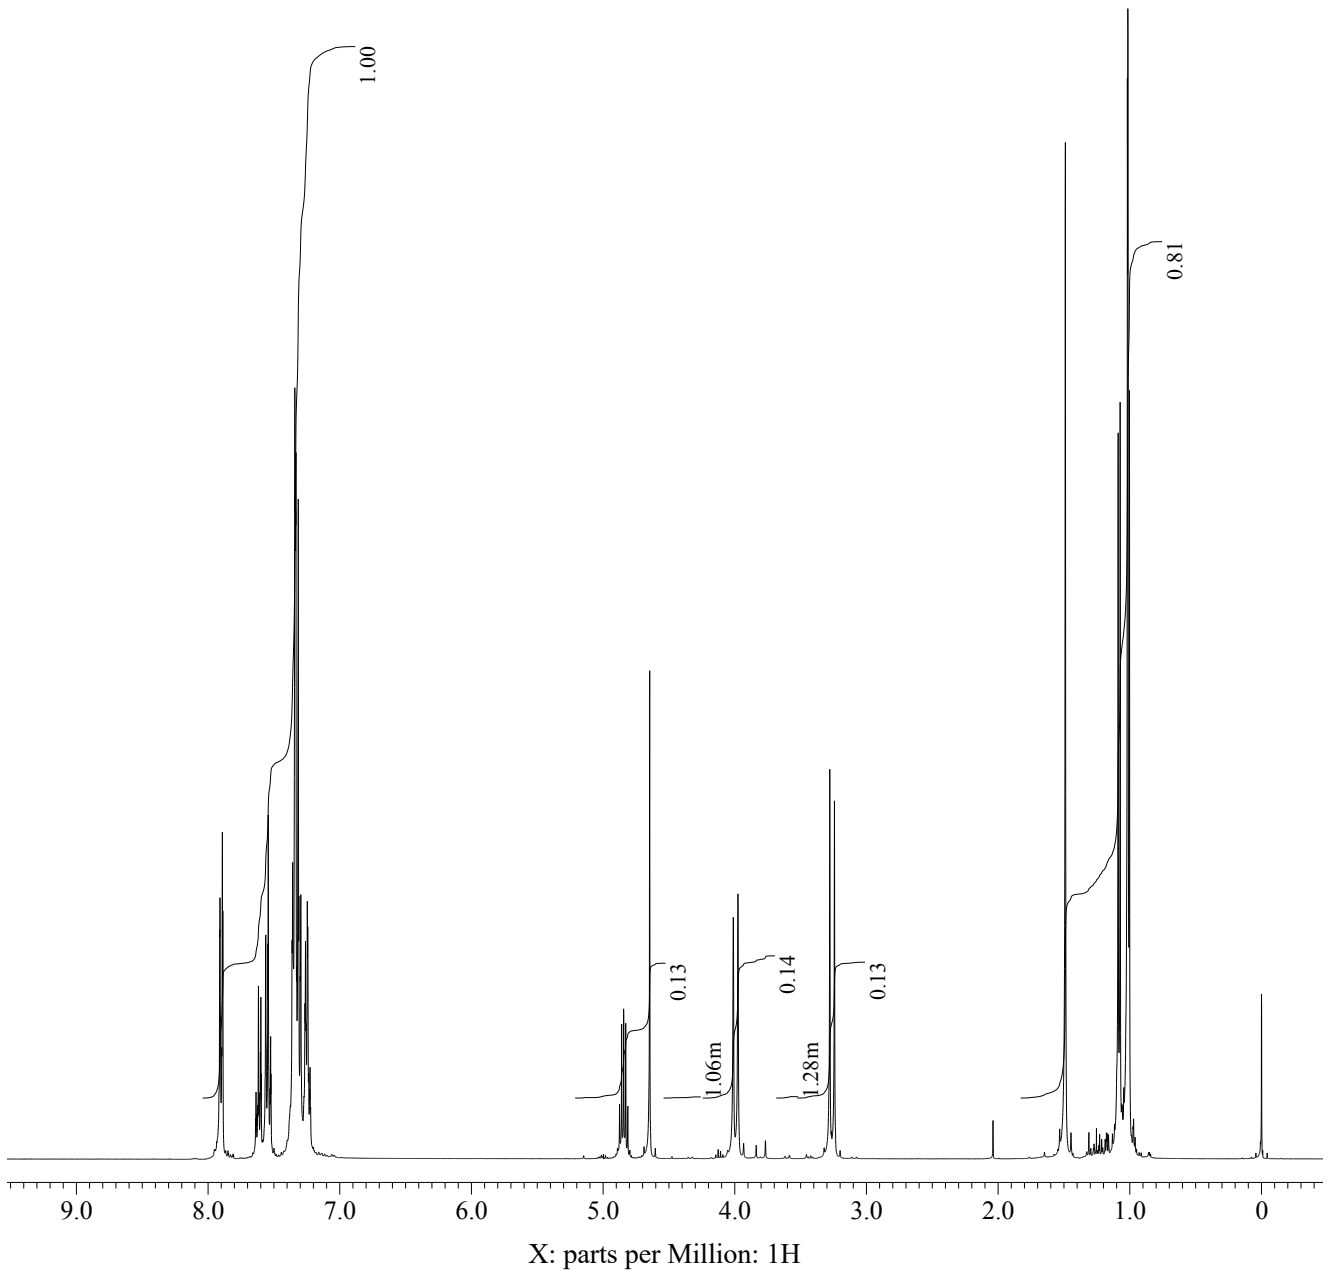

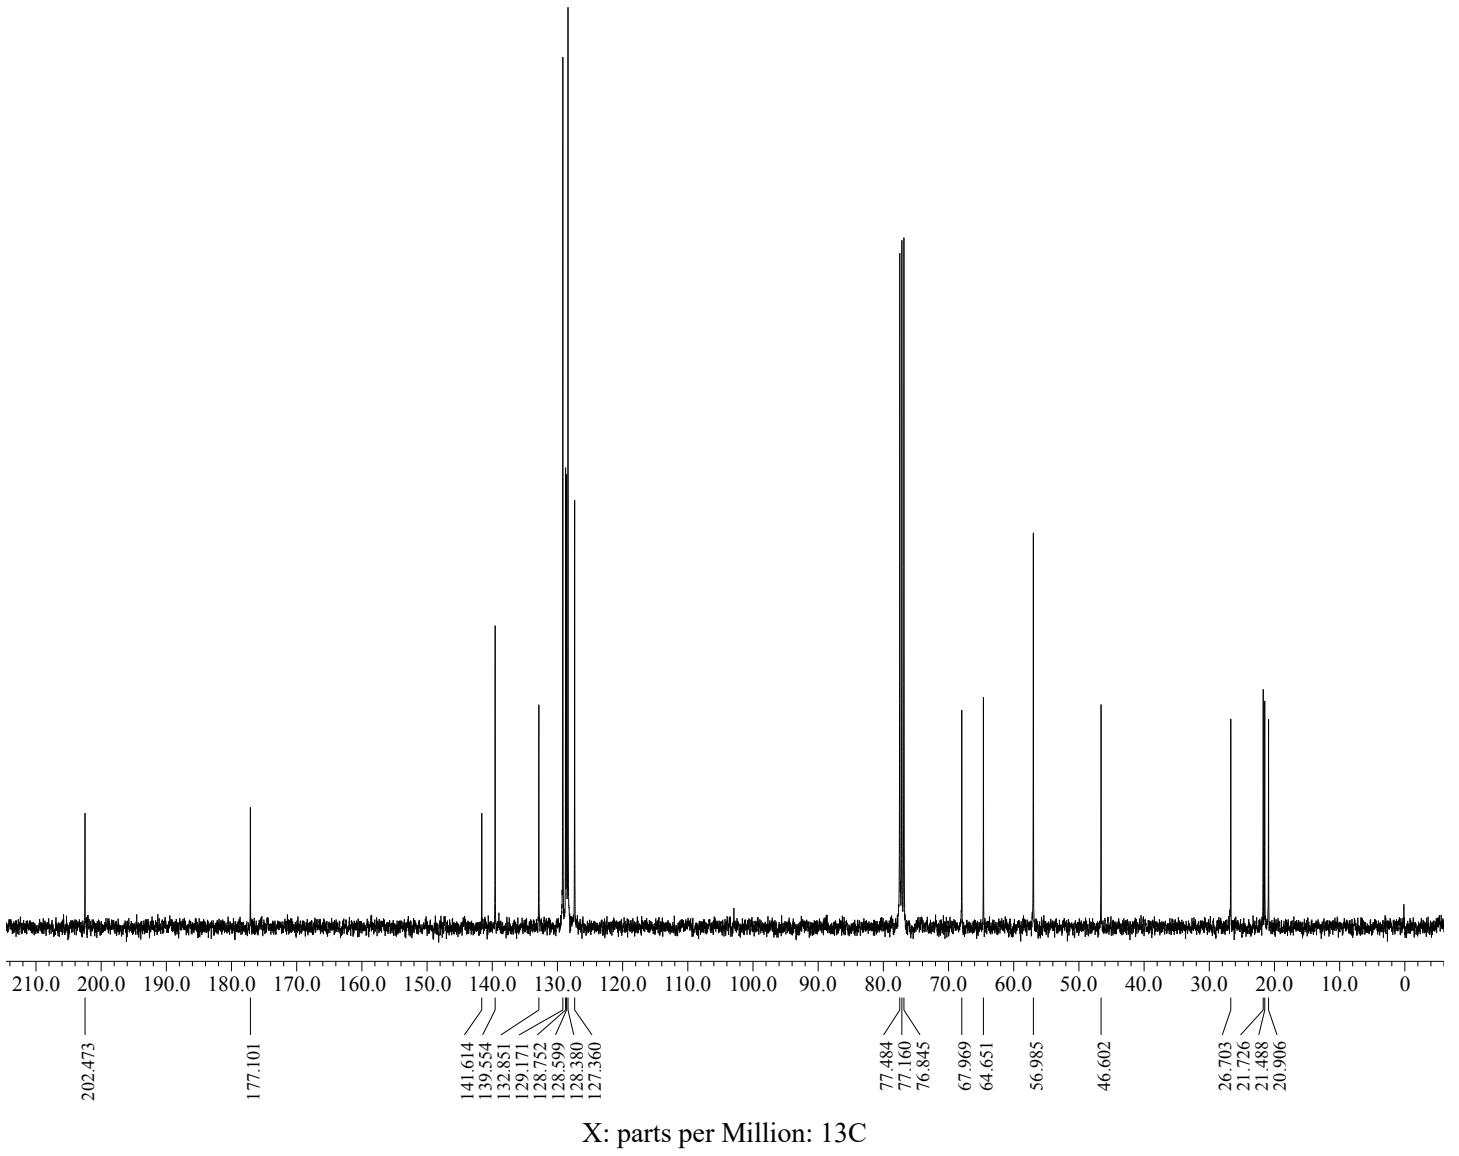

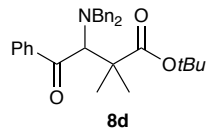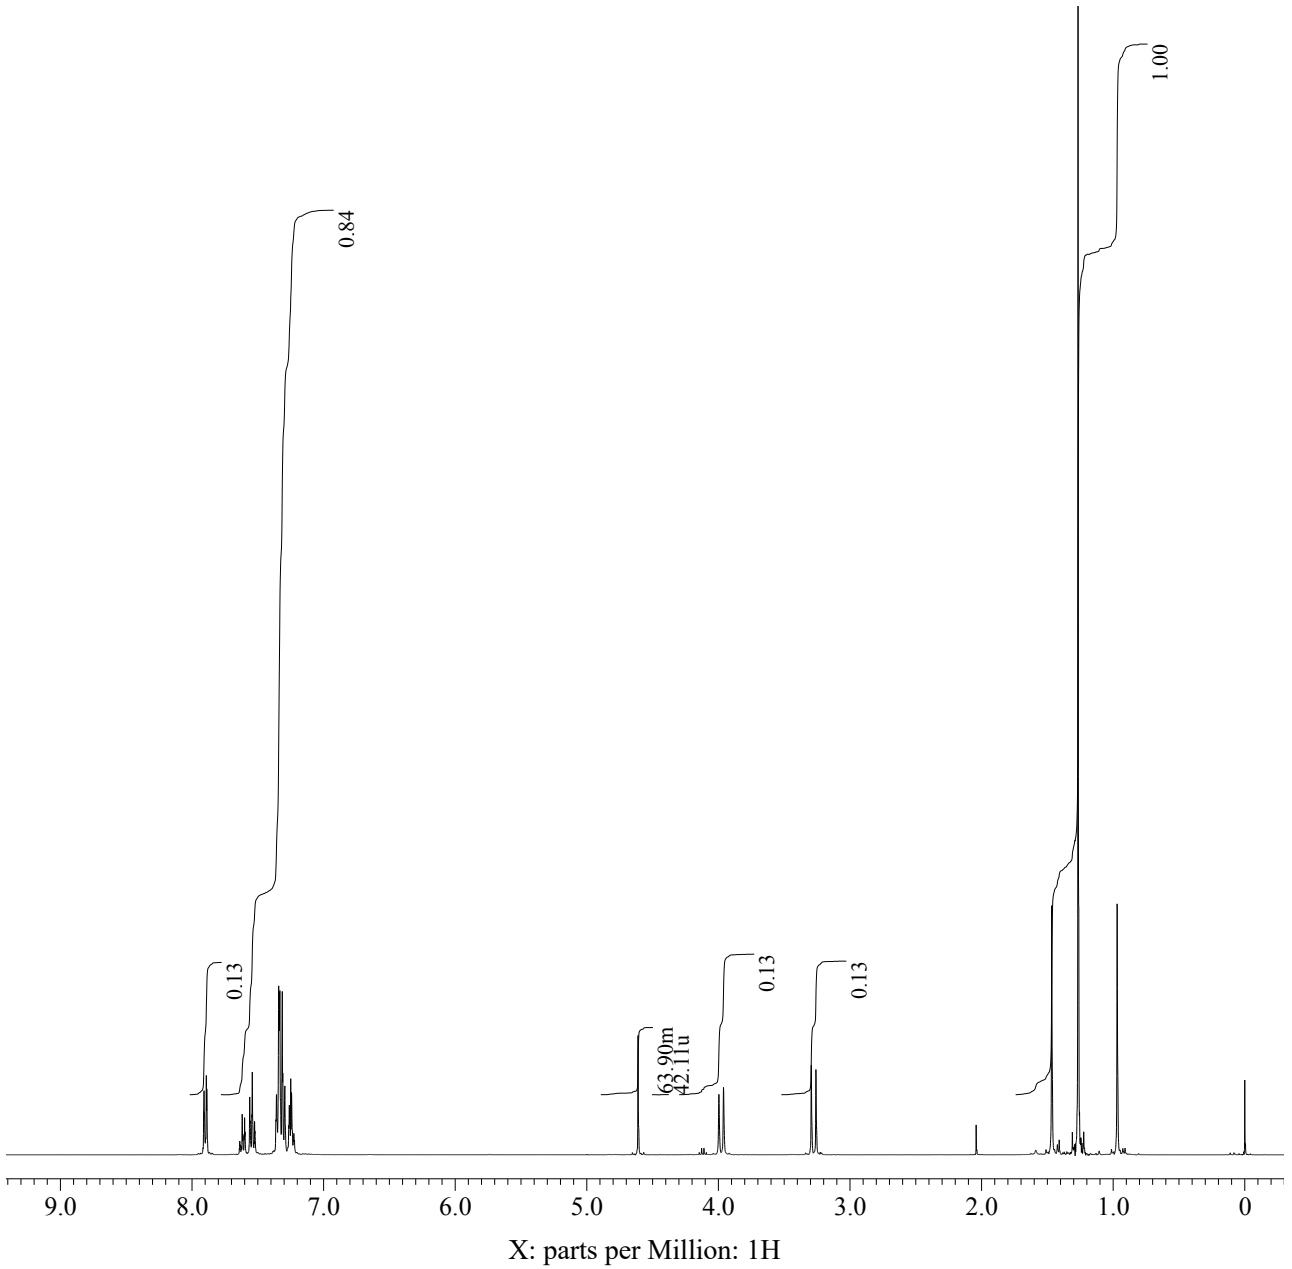

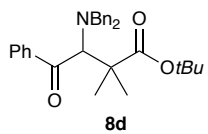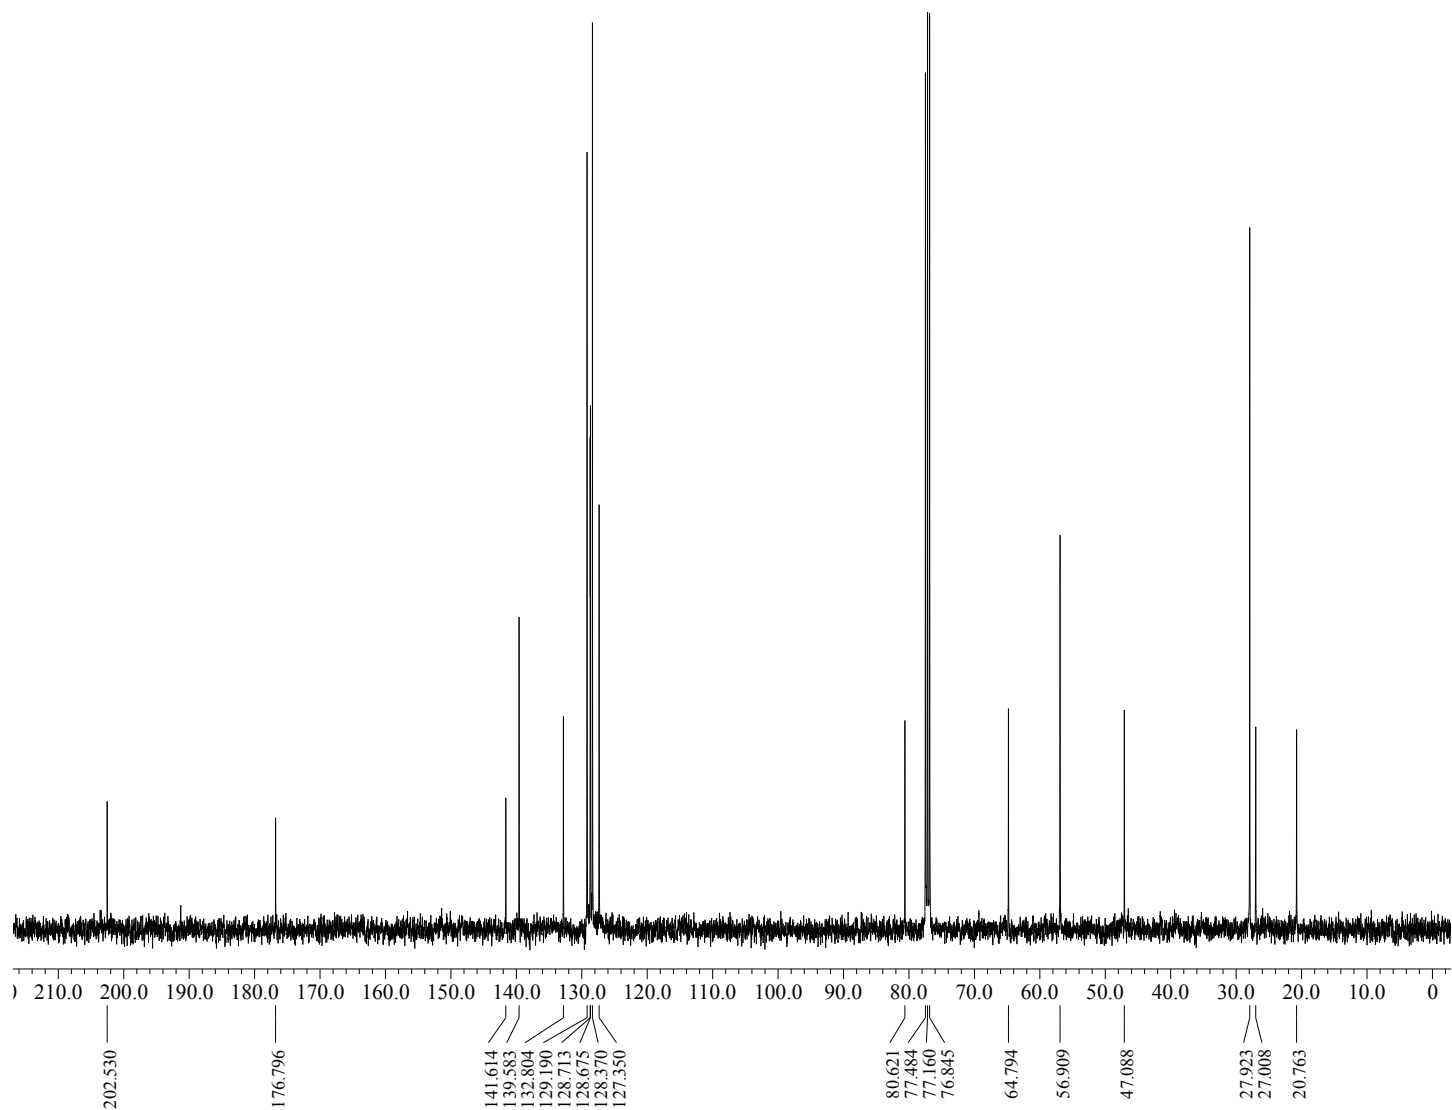

X: parts per Million: 13C

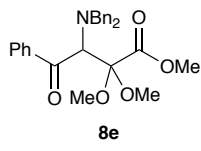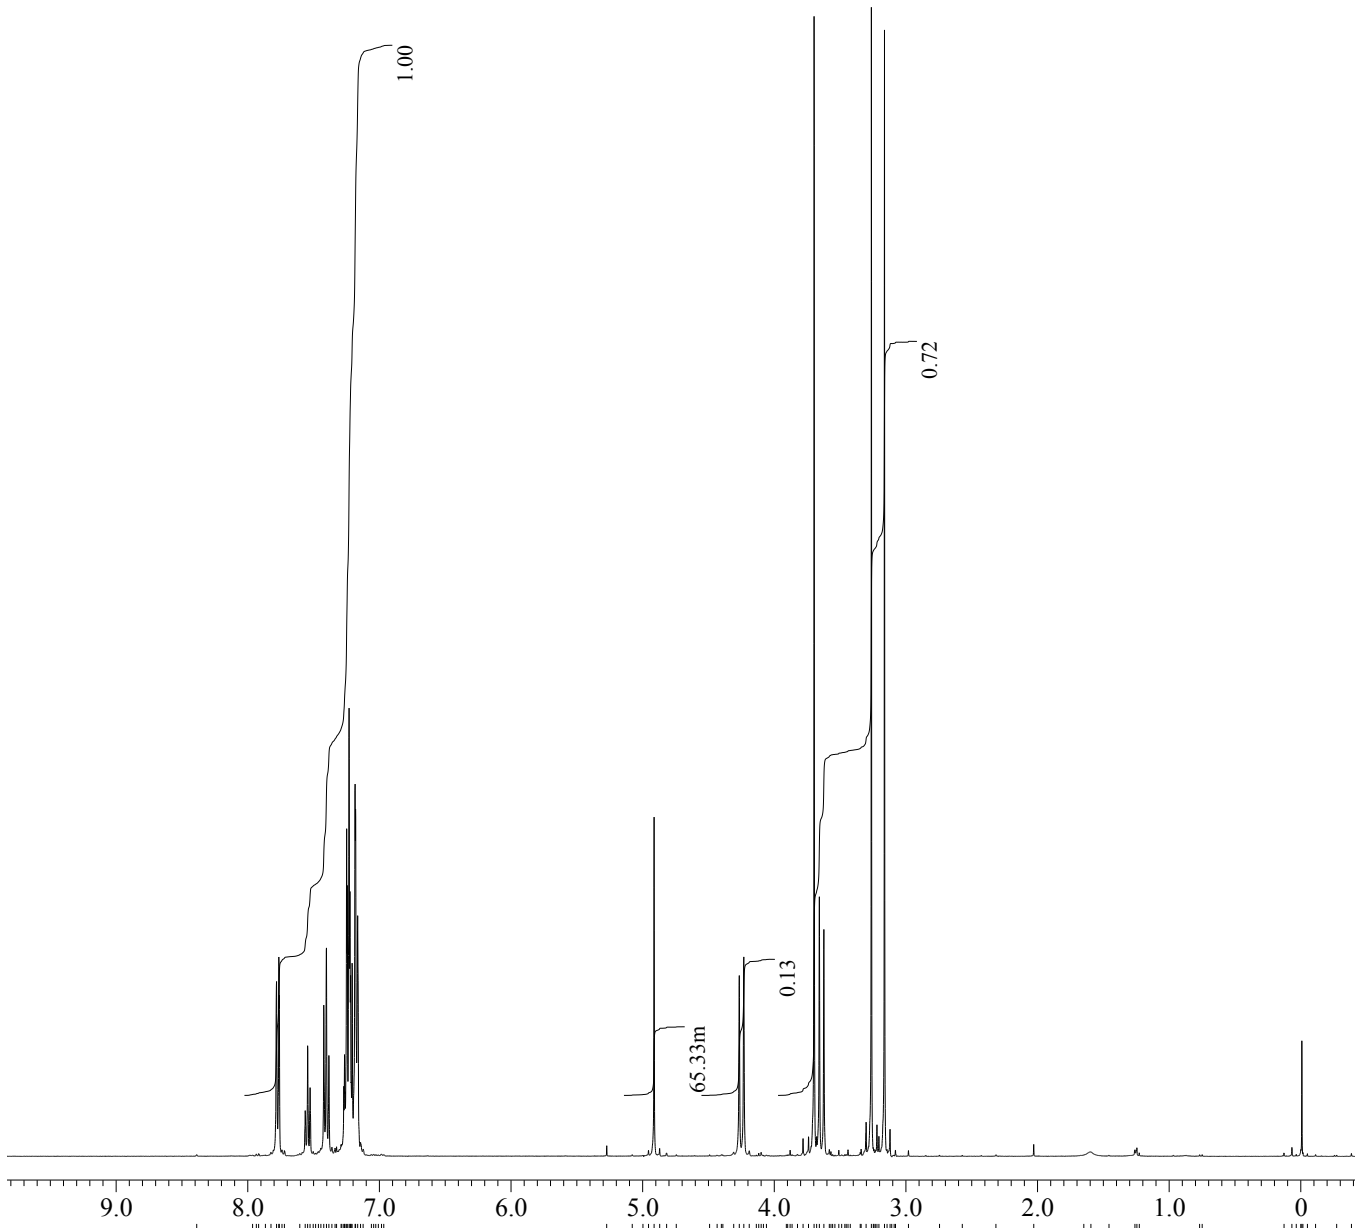

X: parts per Million: 1H



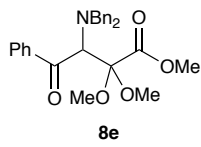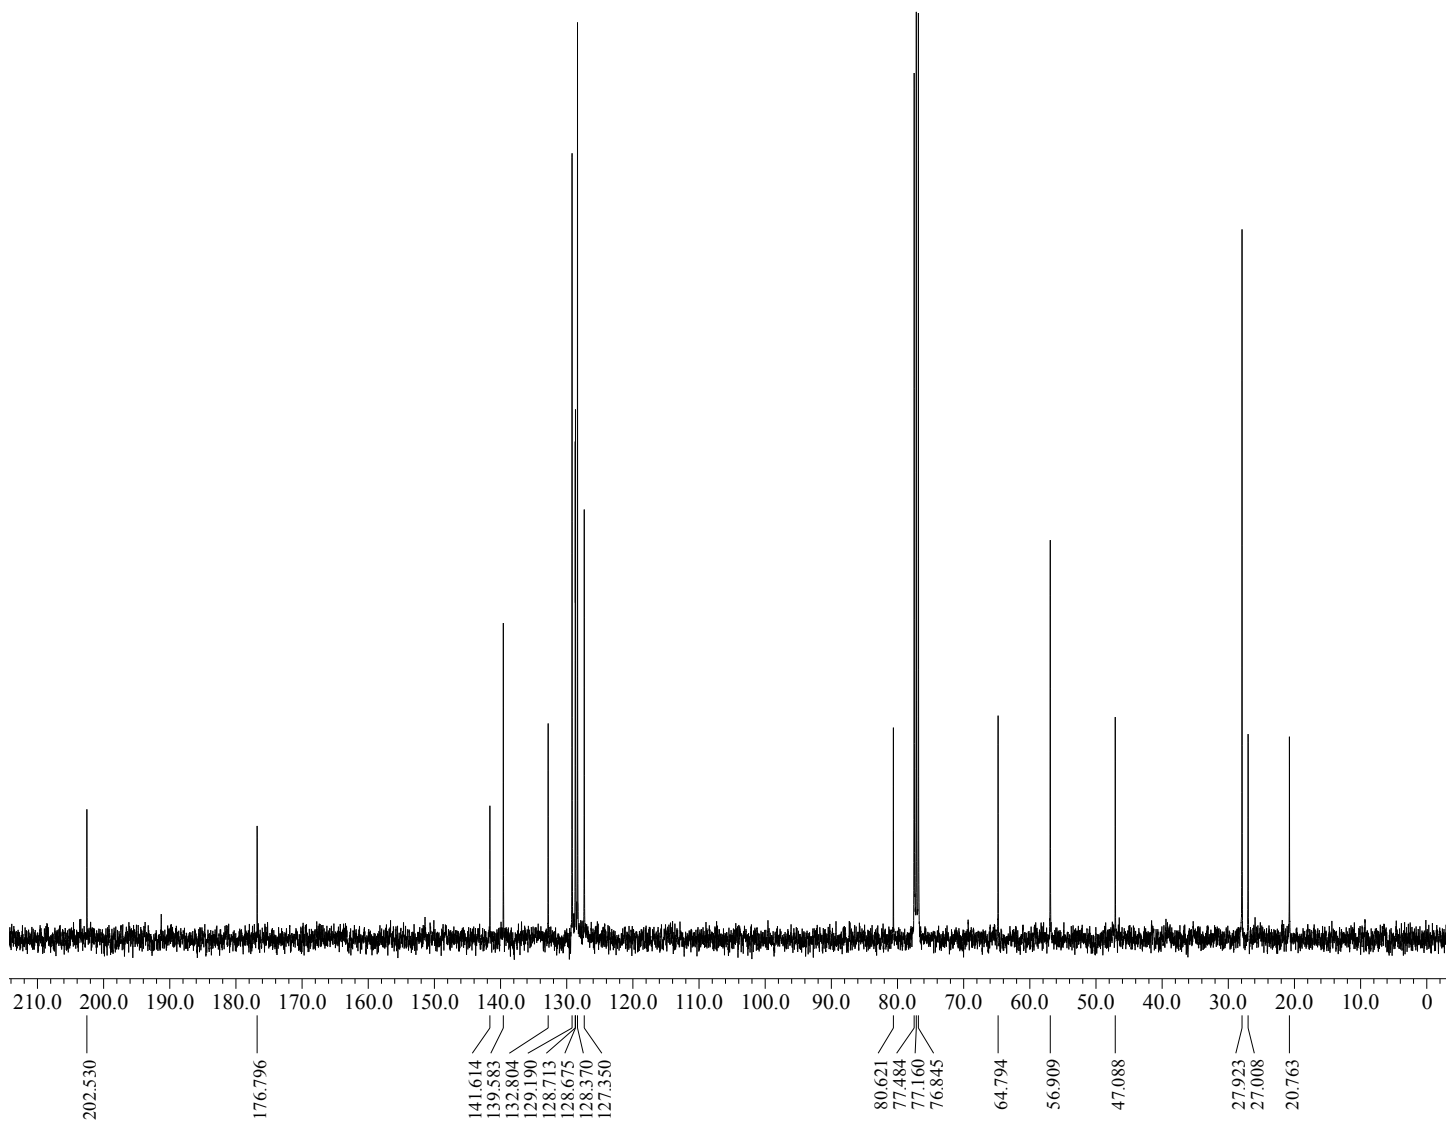

X: parts per Million: 13C

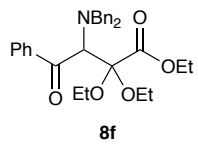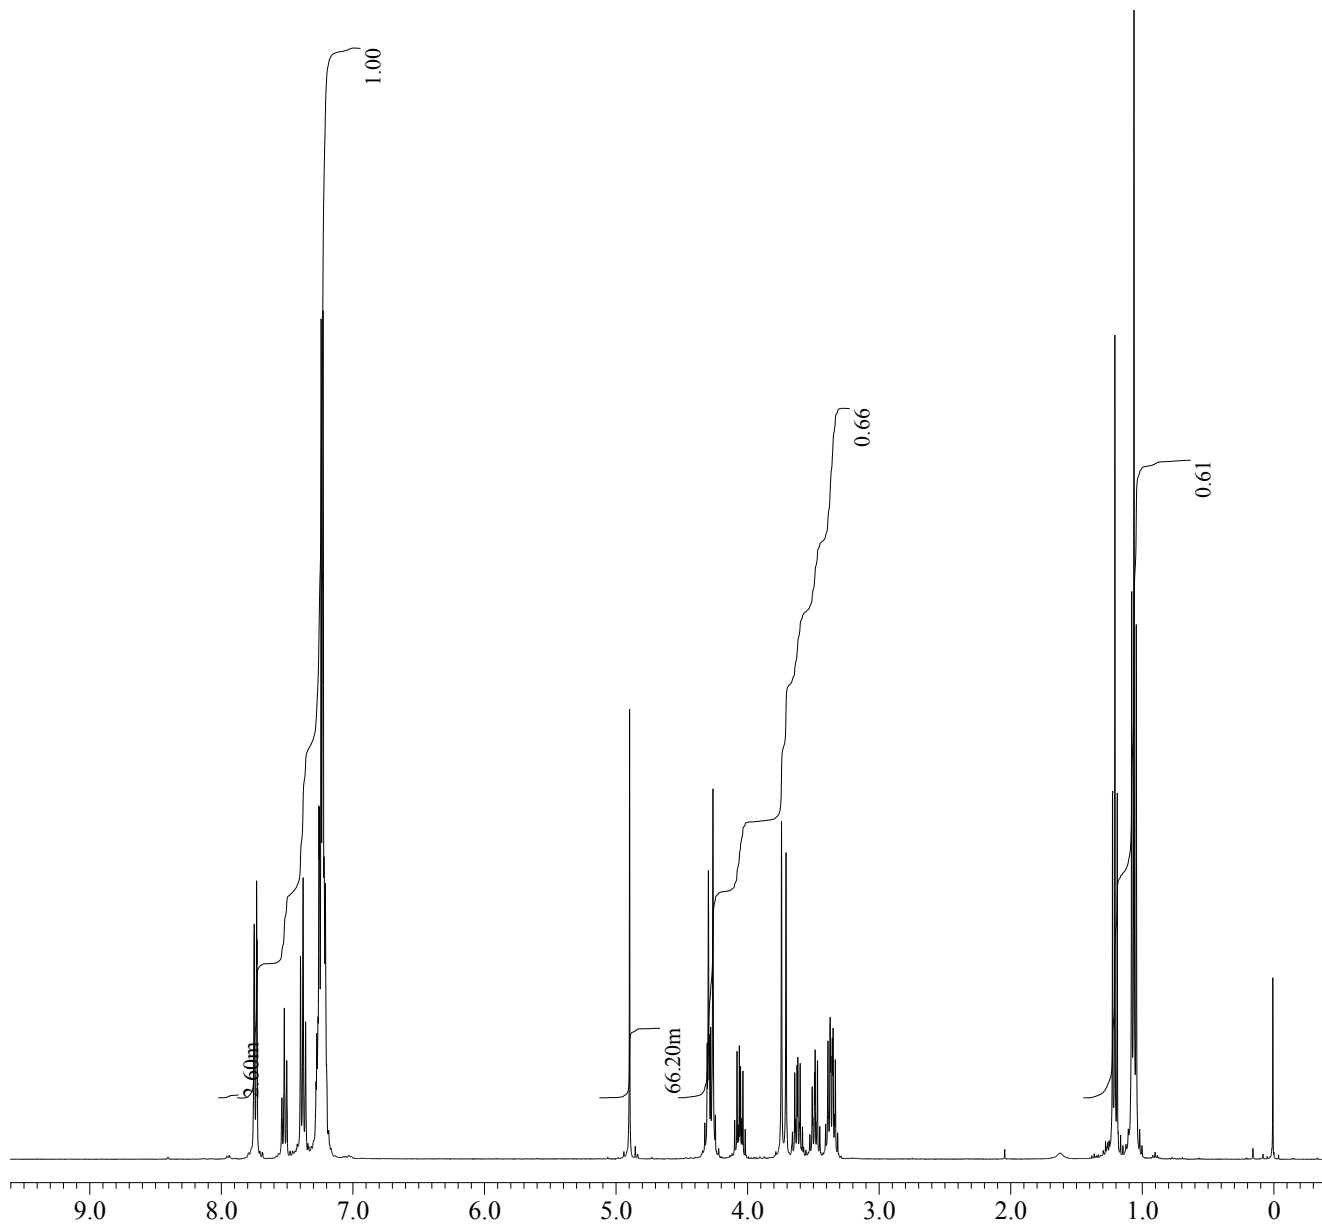

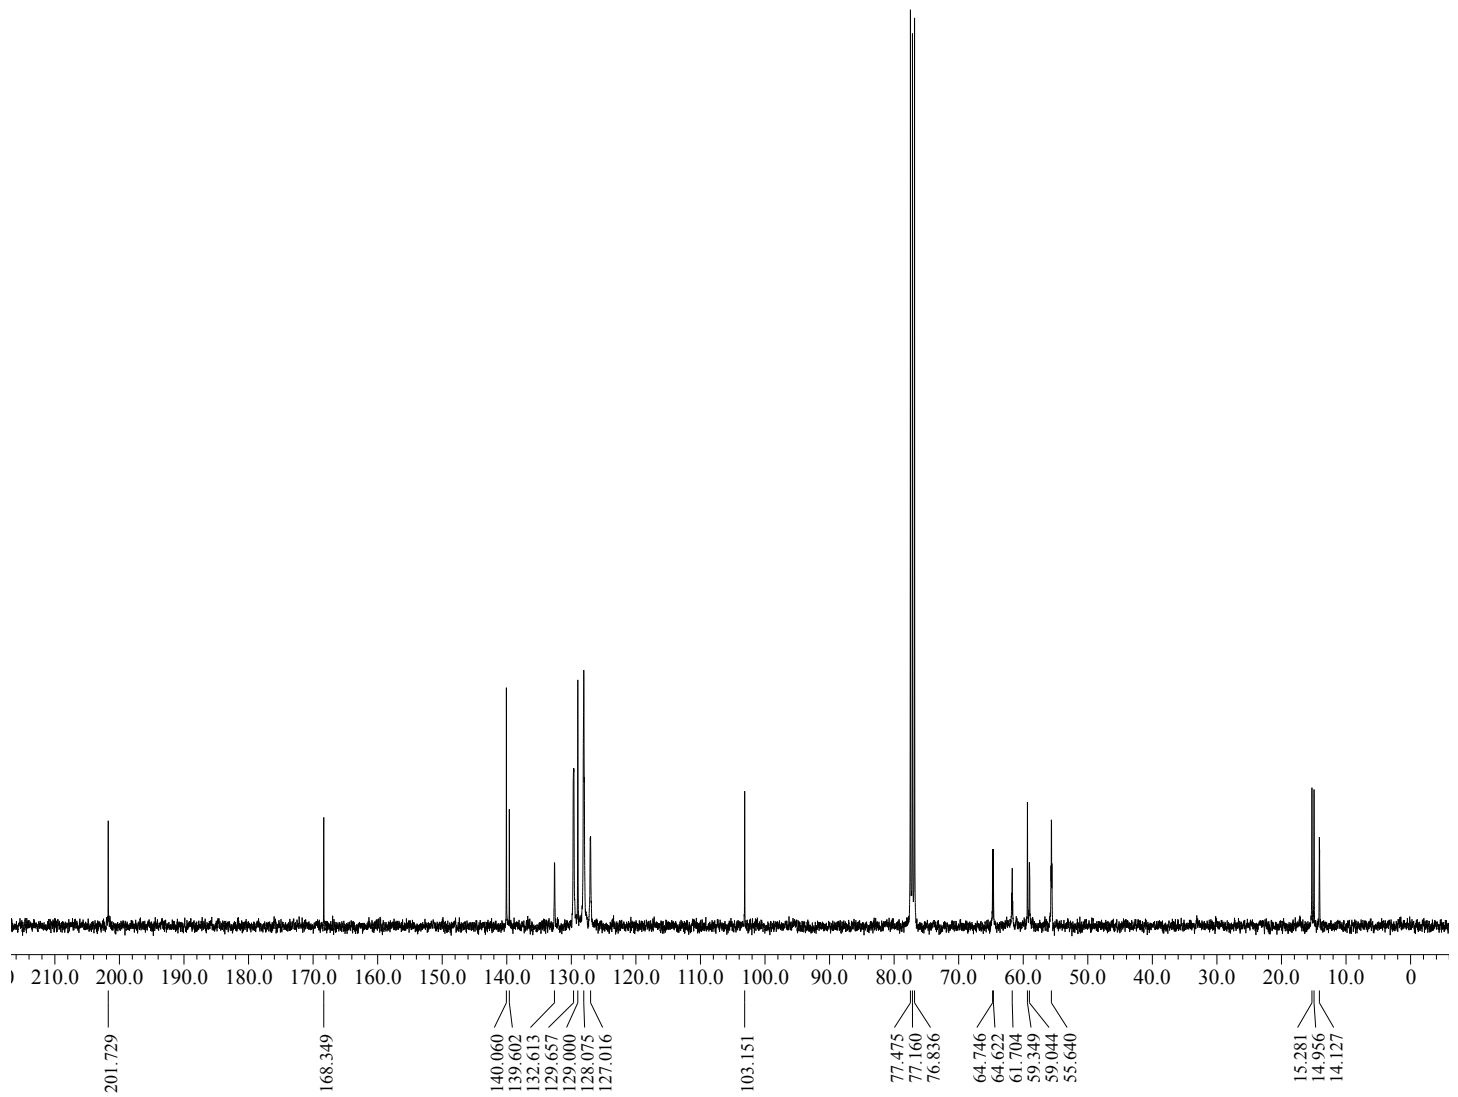

X: parts per Million: 13C

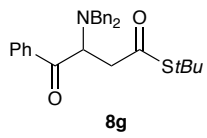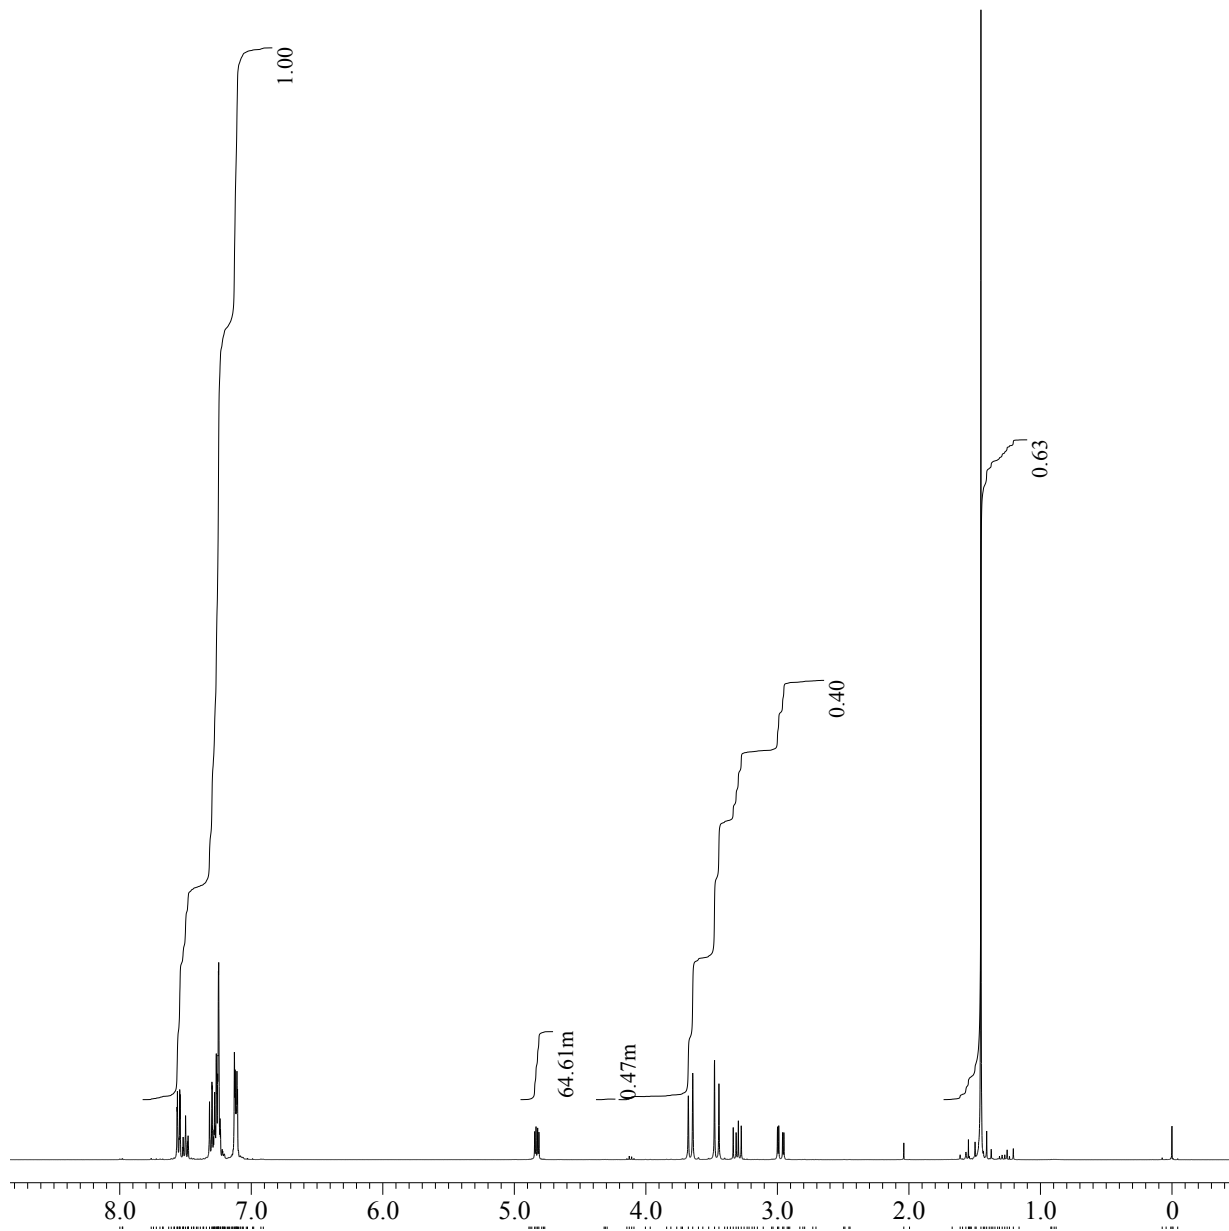

X: parts per Million: 1H

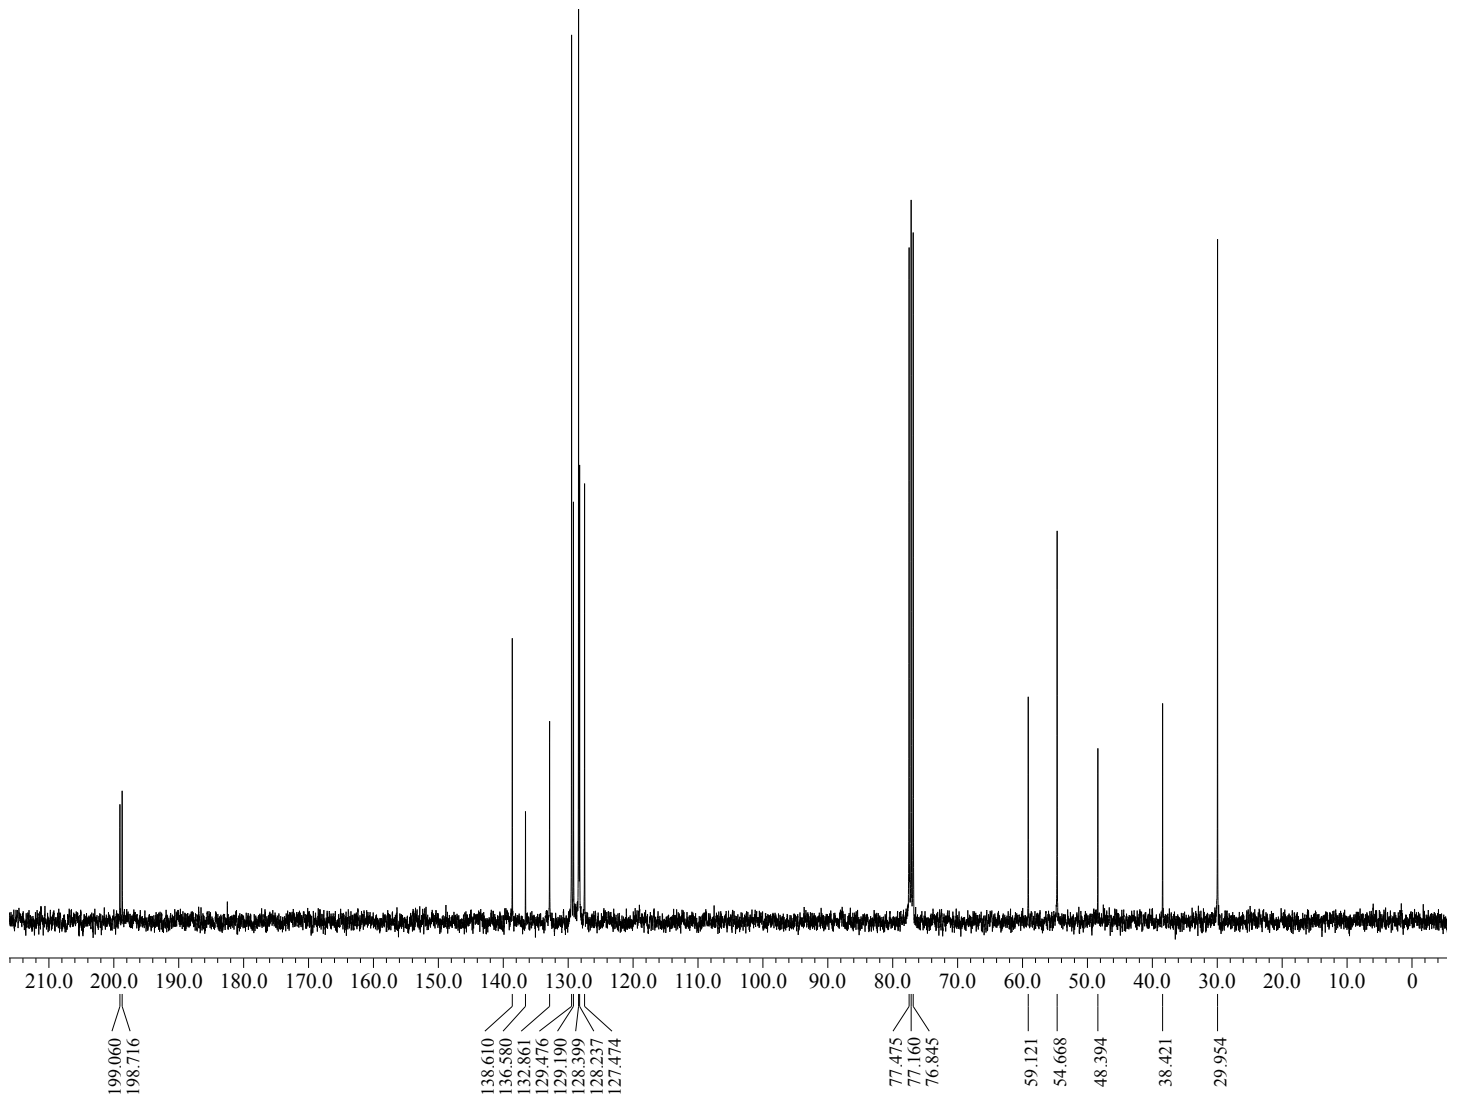

X: parts per Million: 13C





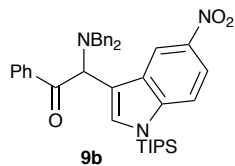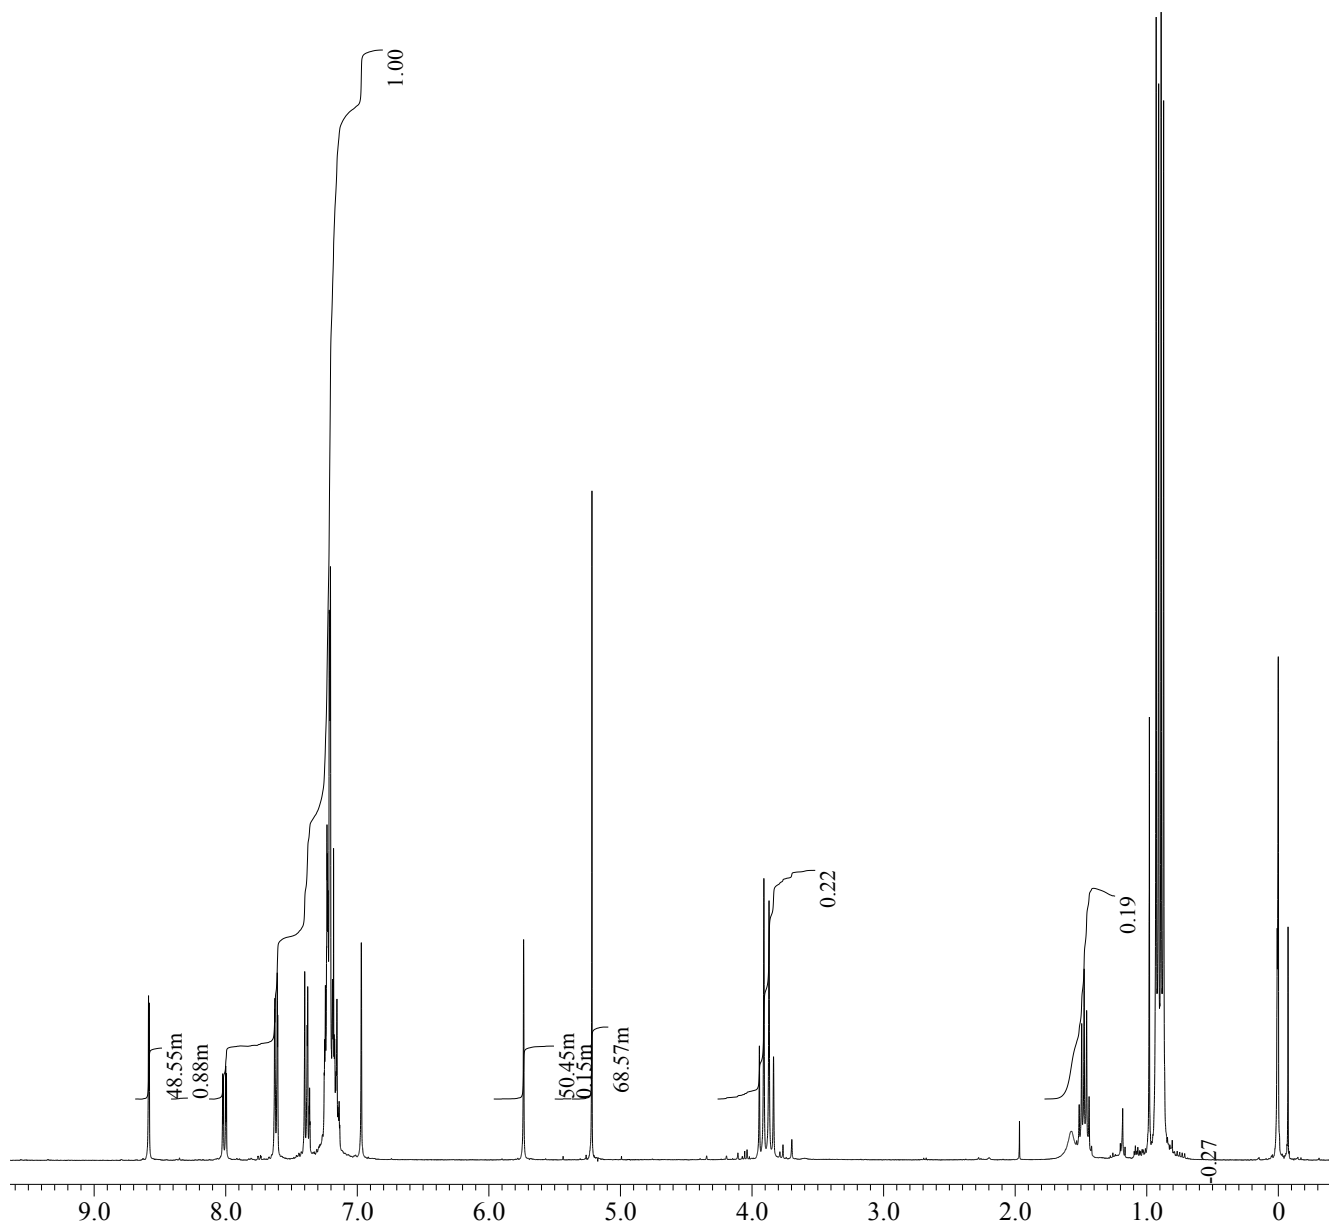

X: parts per Million: 1H



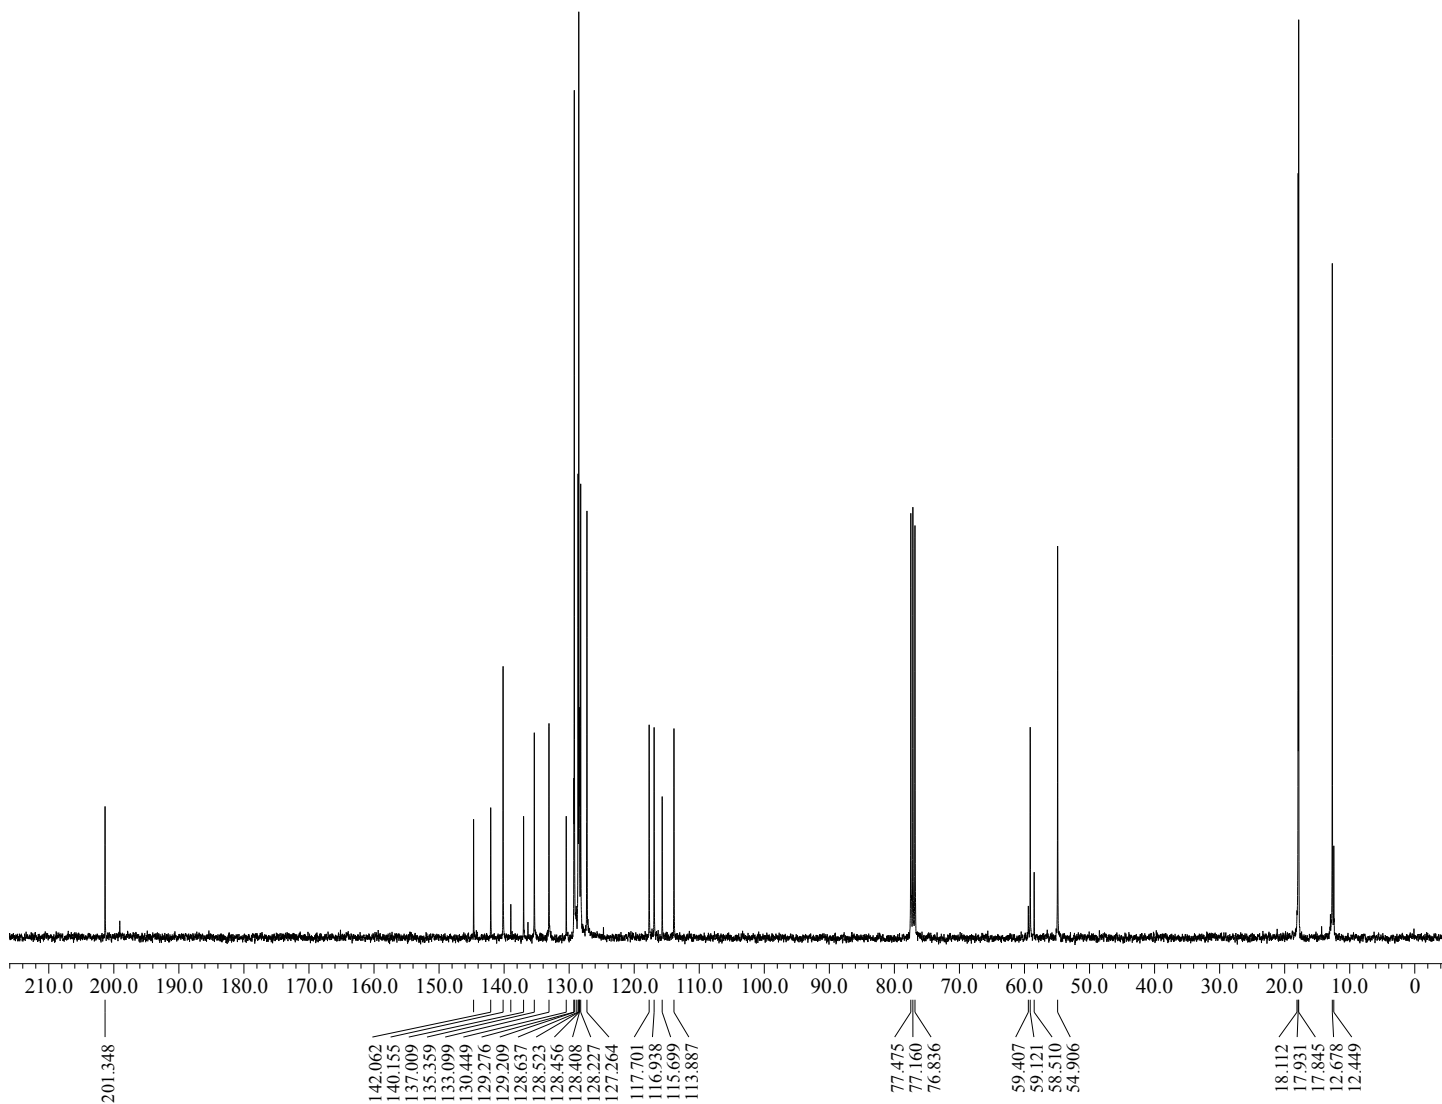

X: parts per Million: 13C

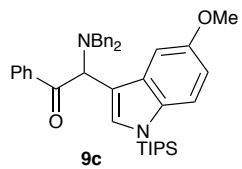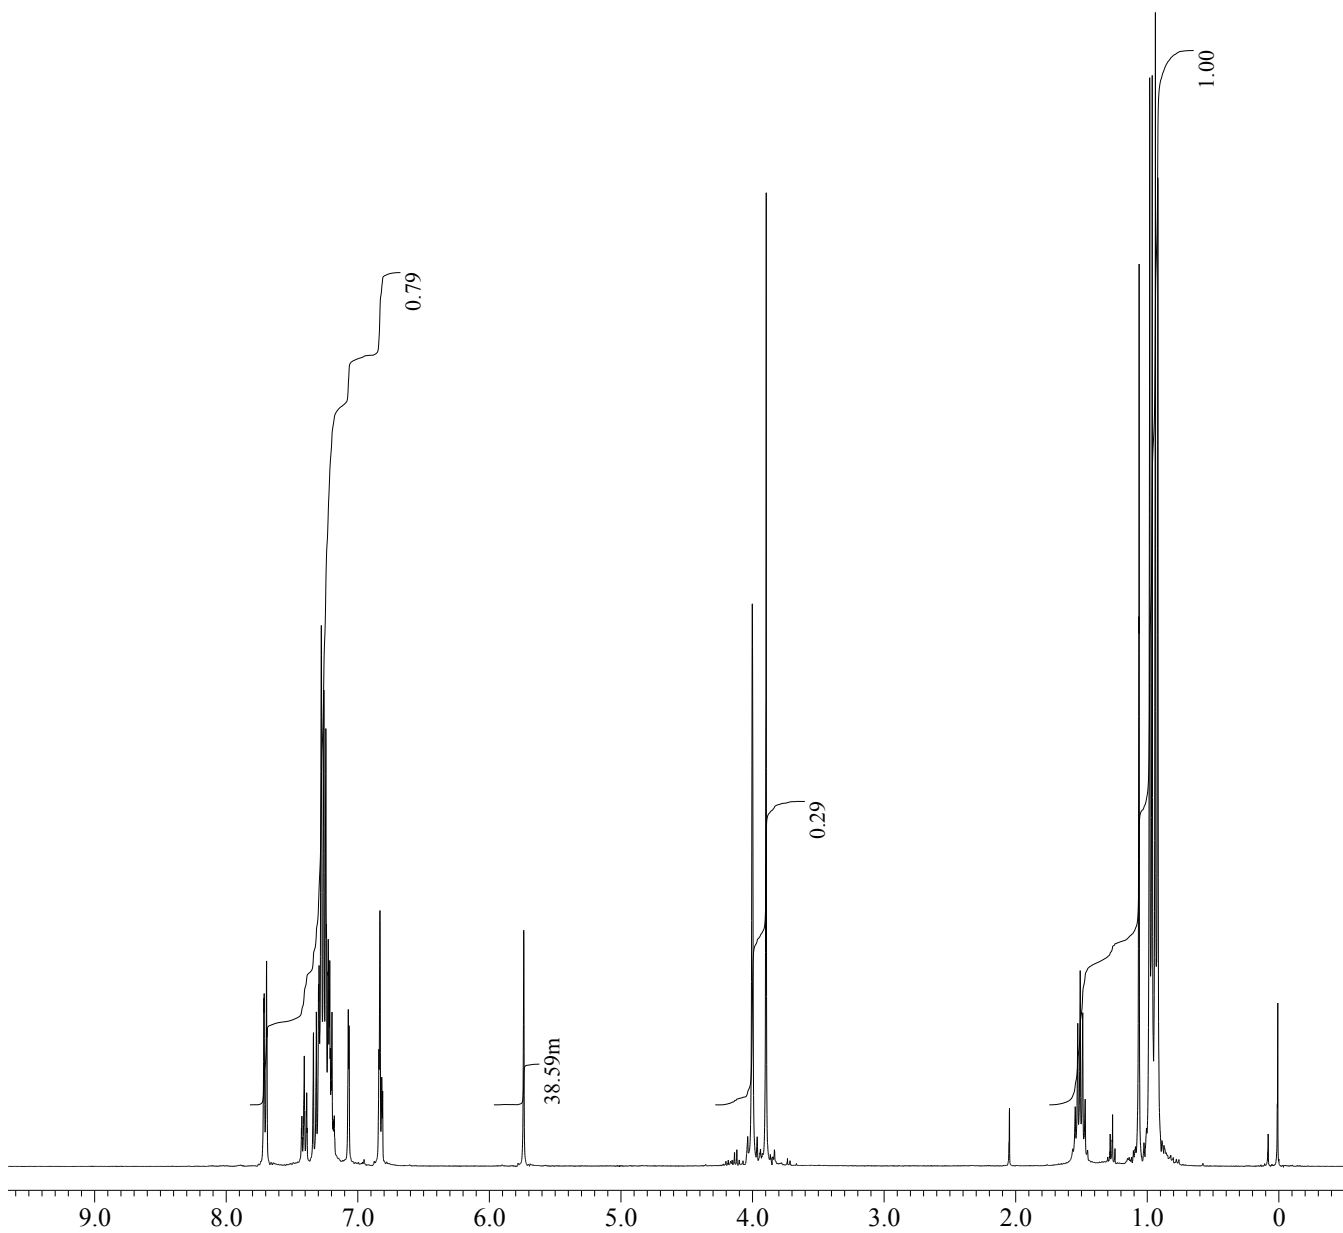

X: parts per Million: 1H

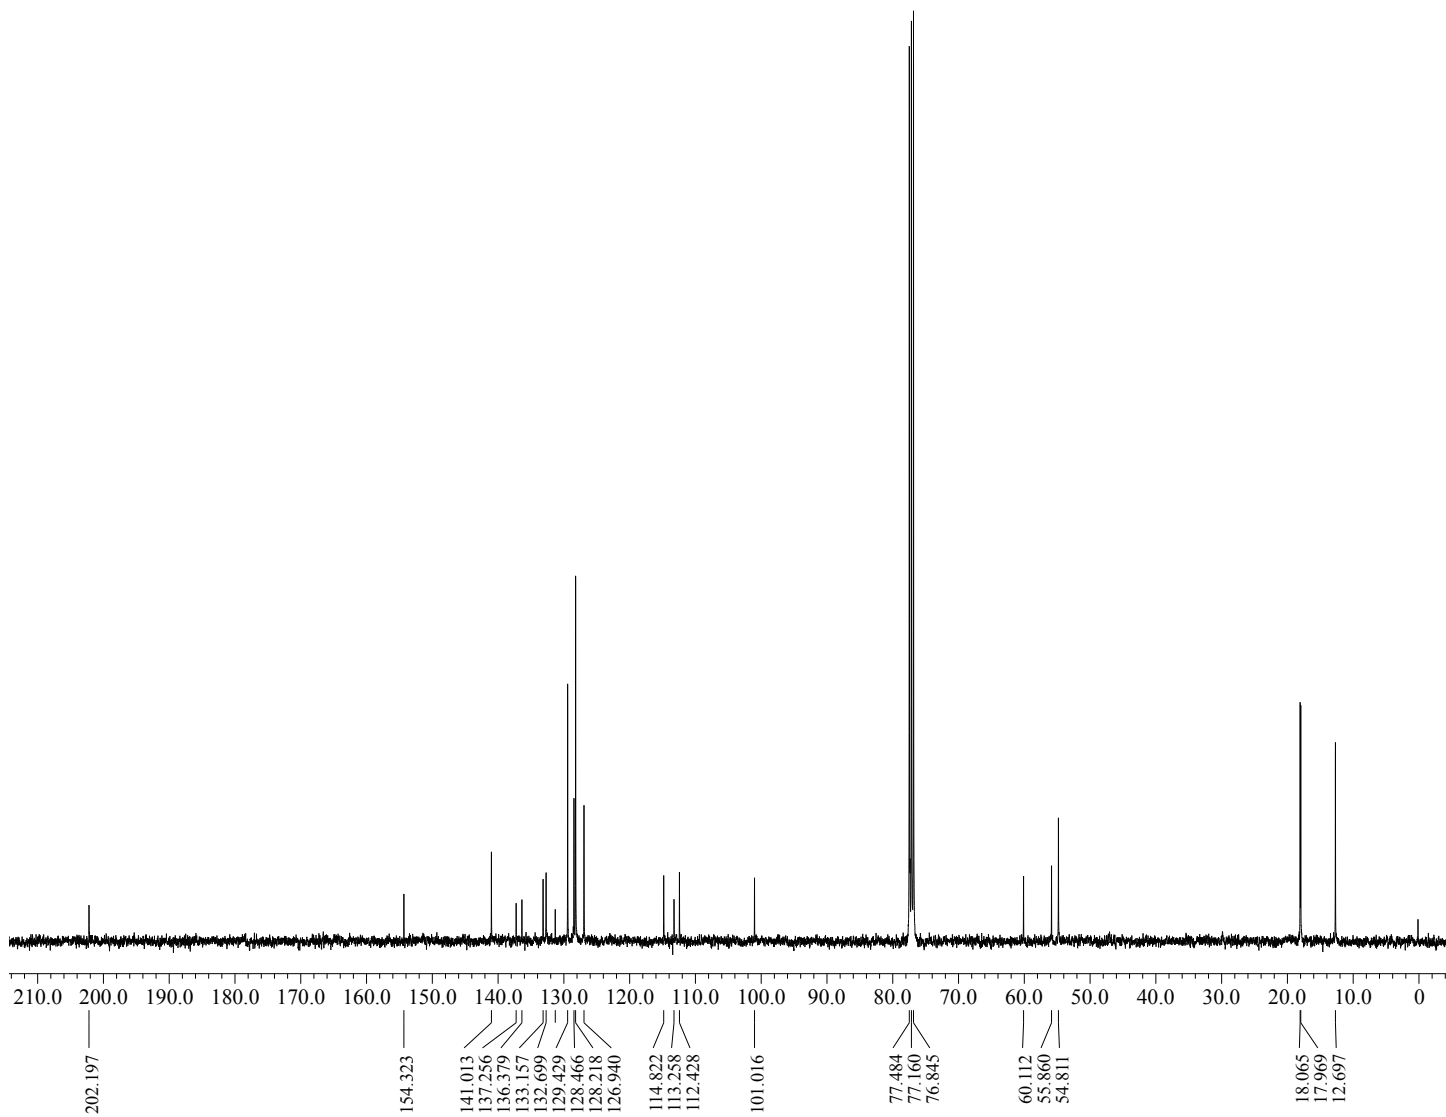

X: parts per Million: 13C

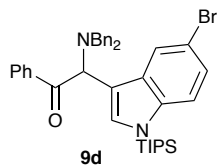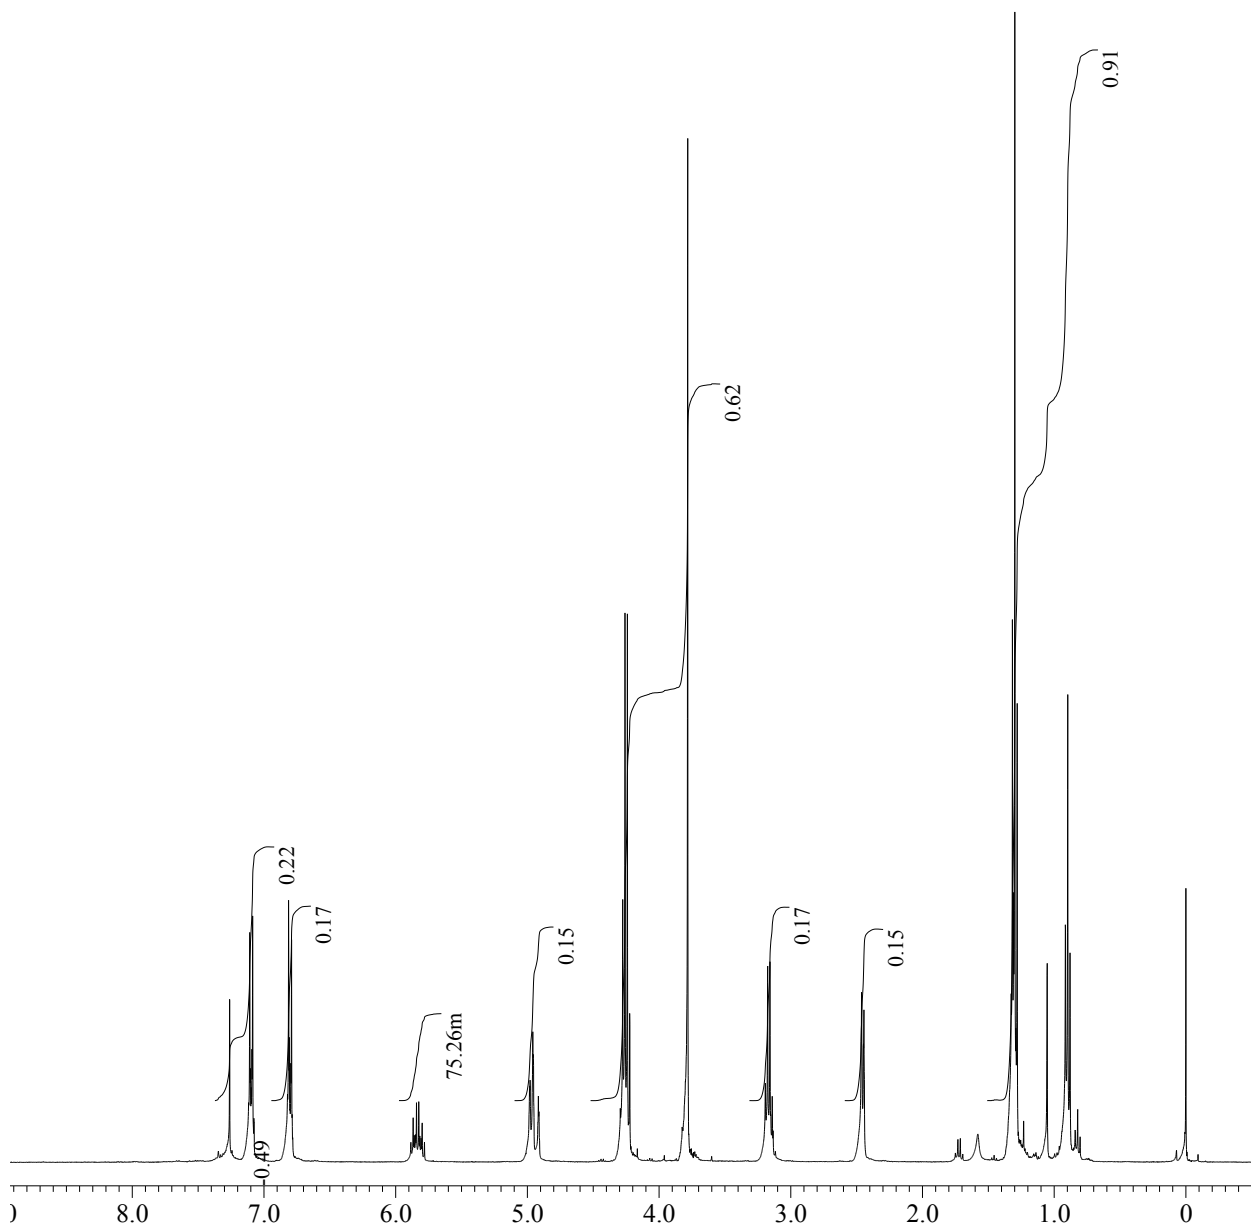

X: parts per Million: 1H

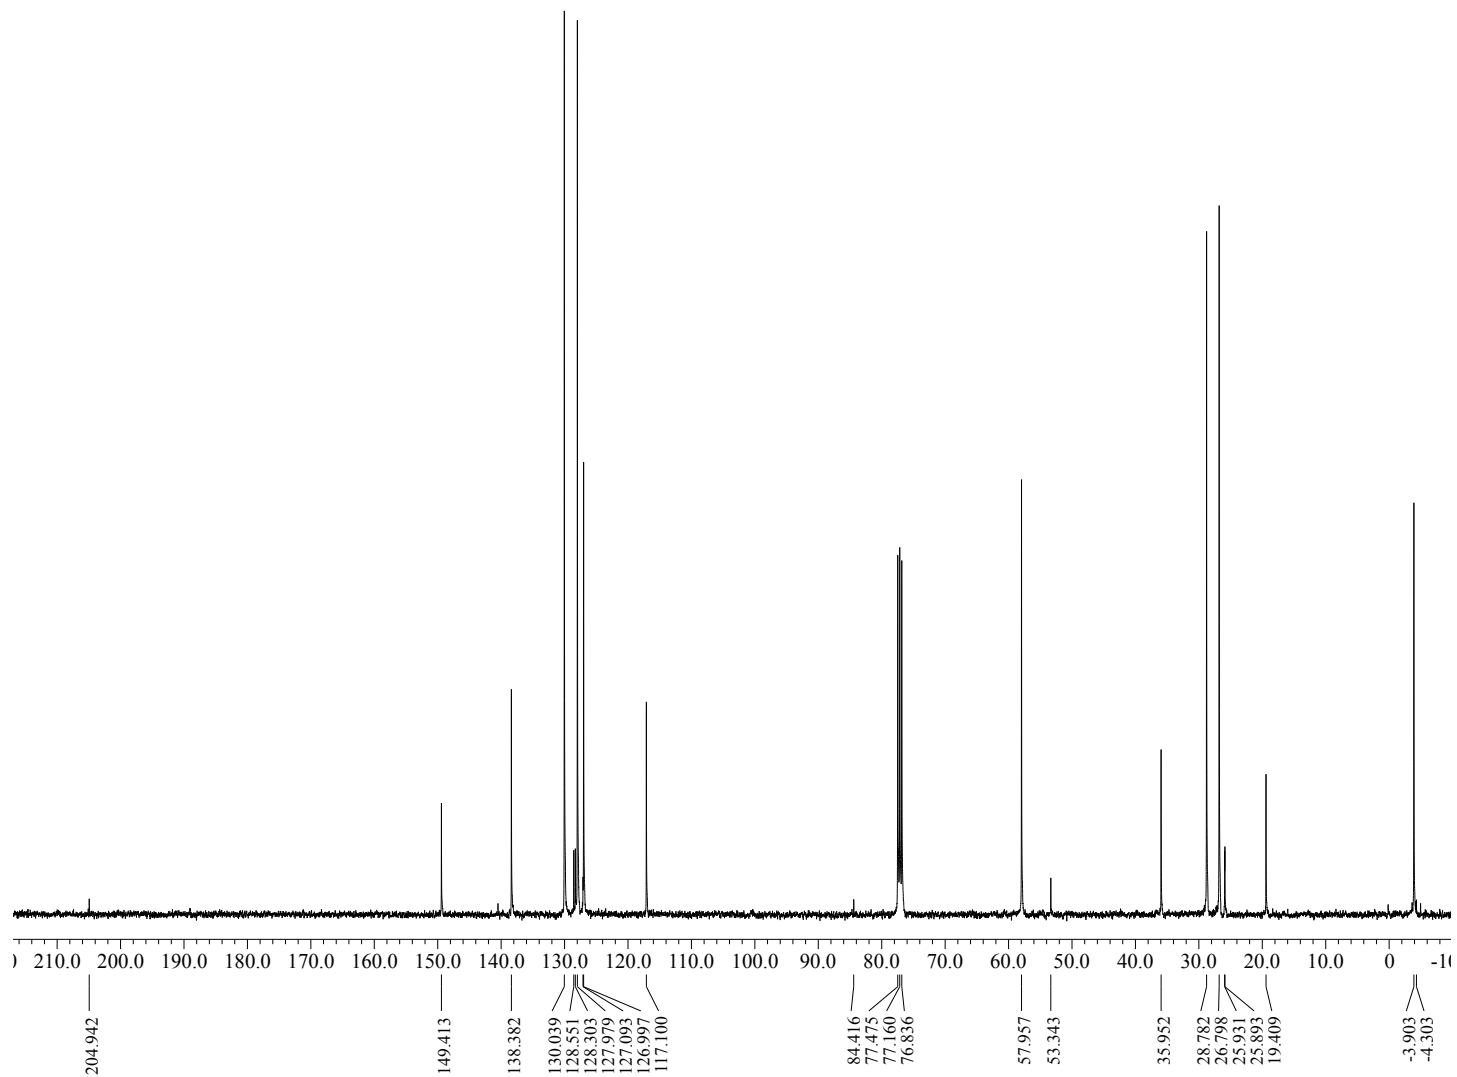

X: parts per Million: 13C

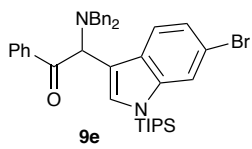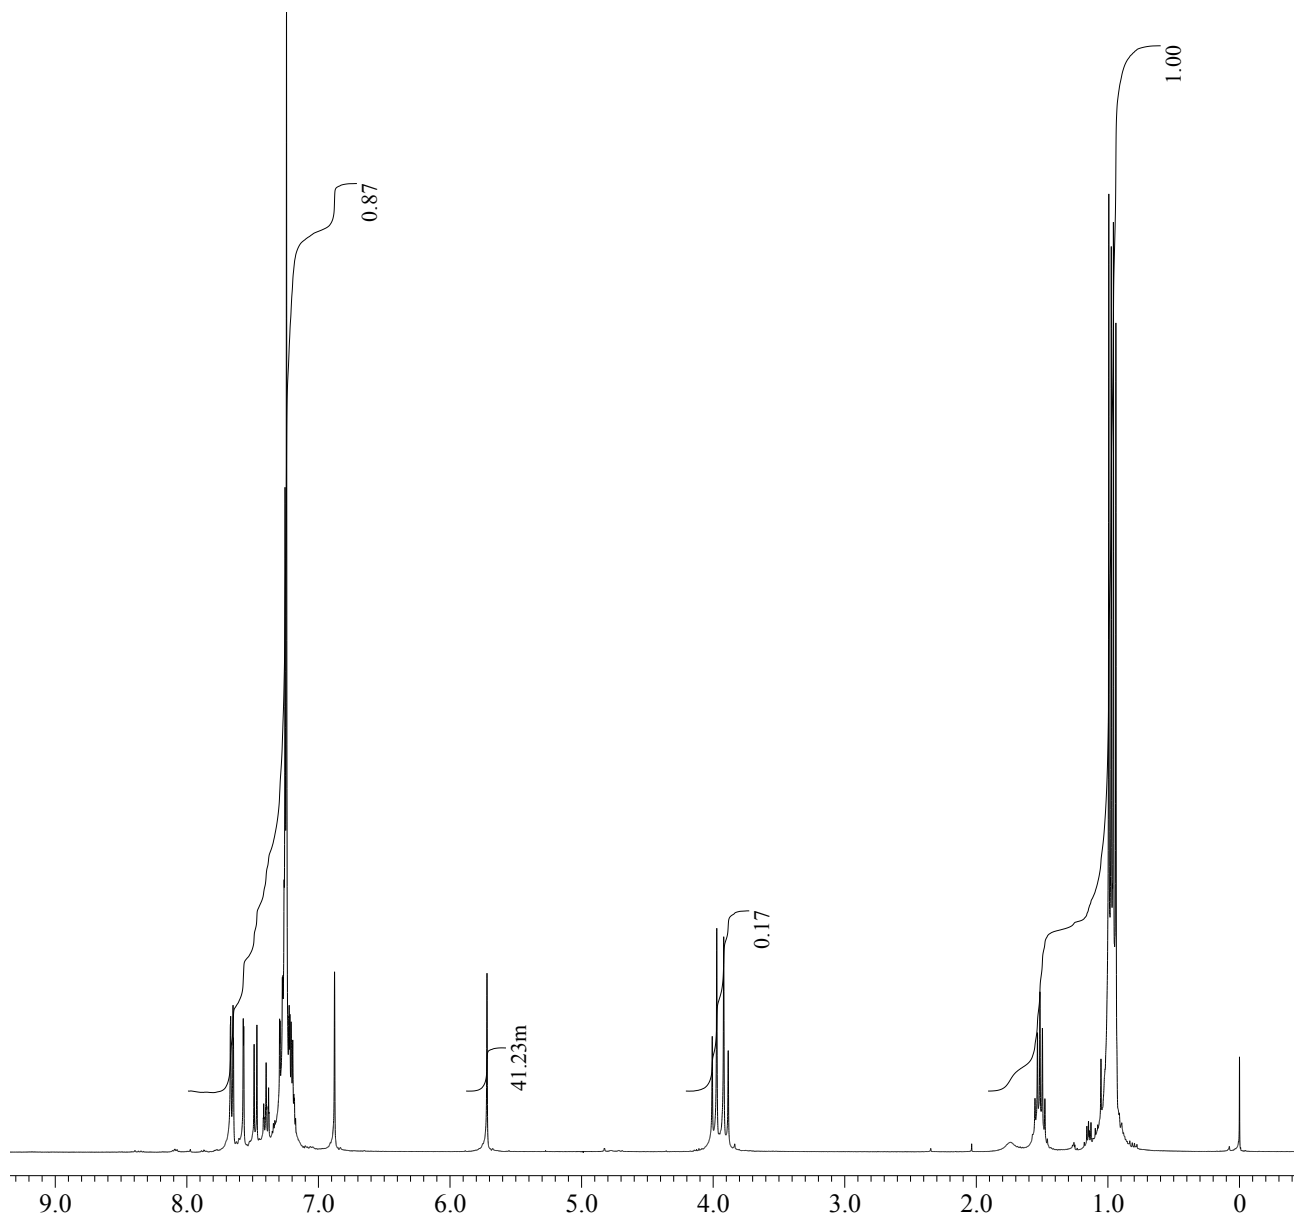

X: parts per Million: 1H

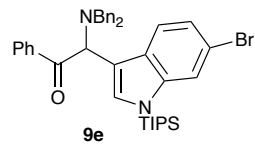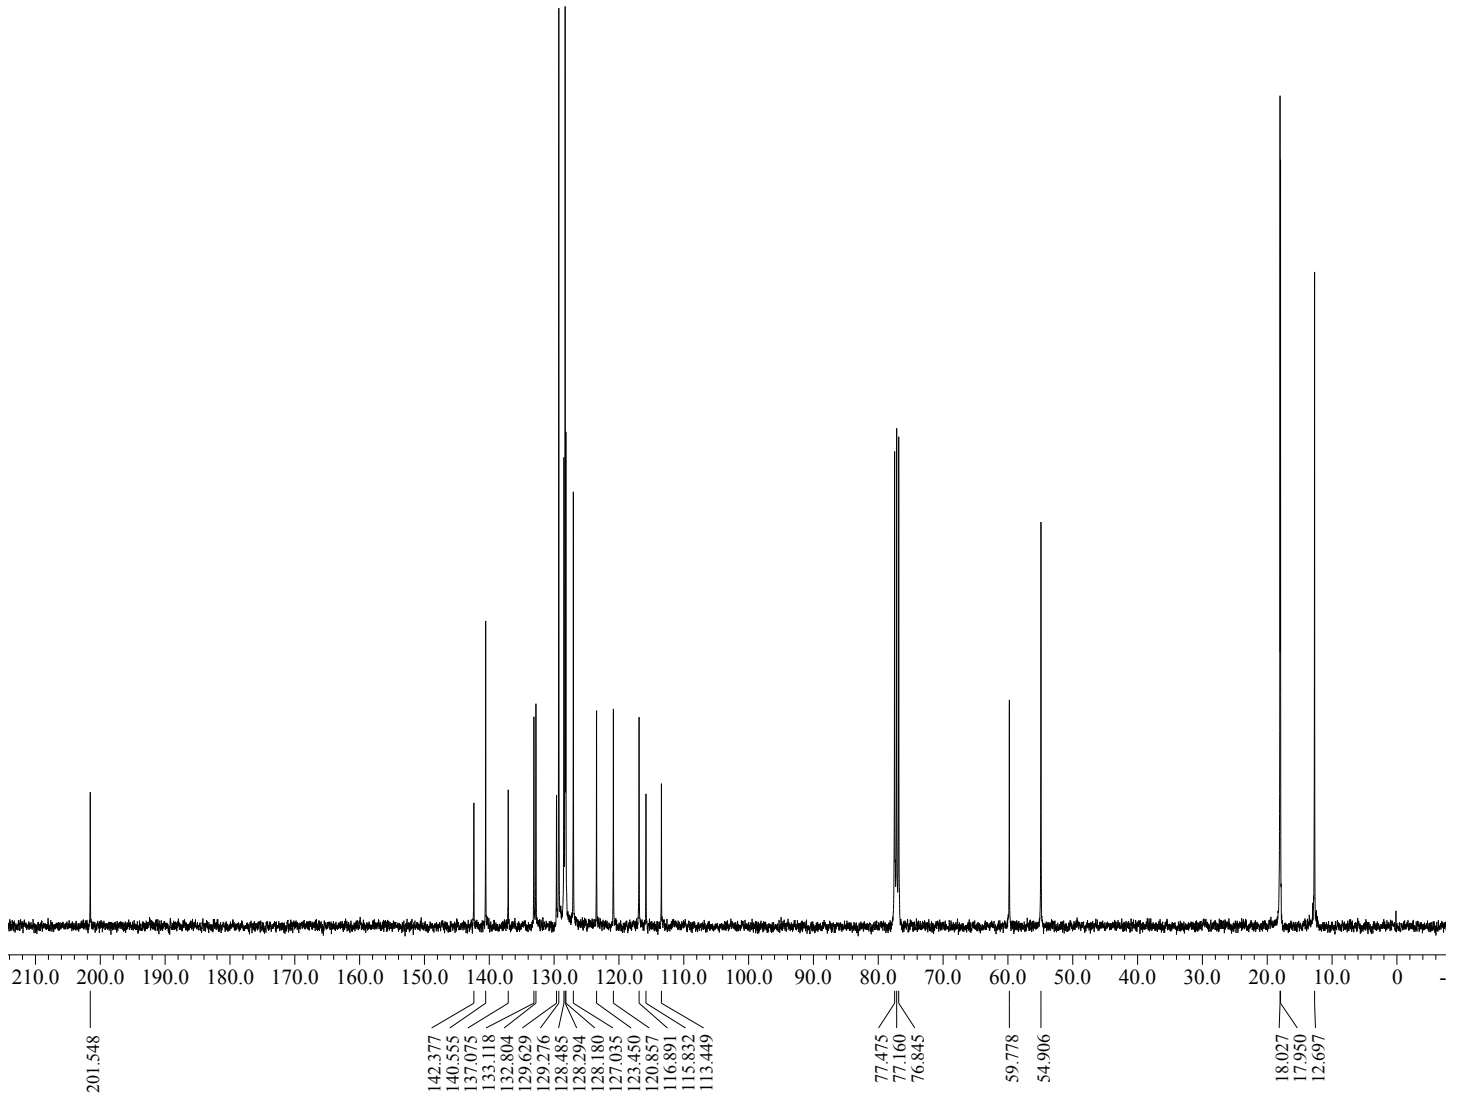

X: parts per Million: 13C

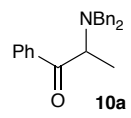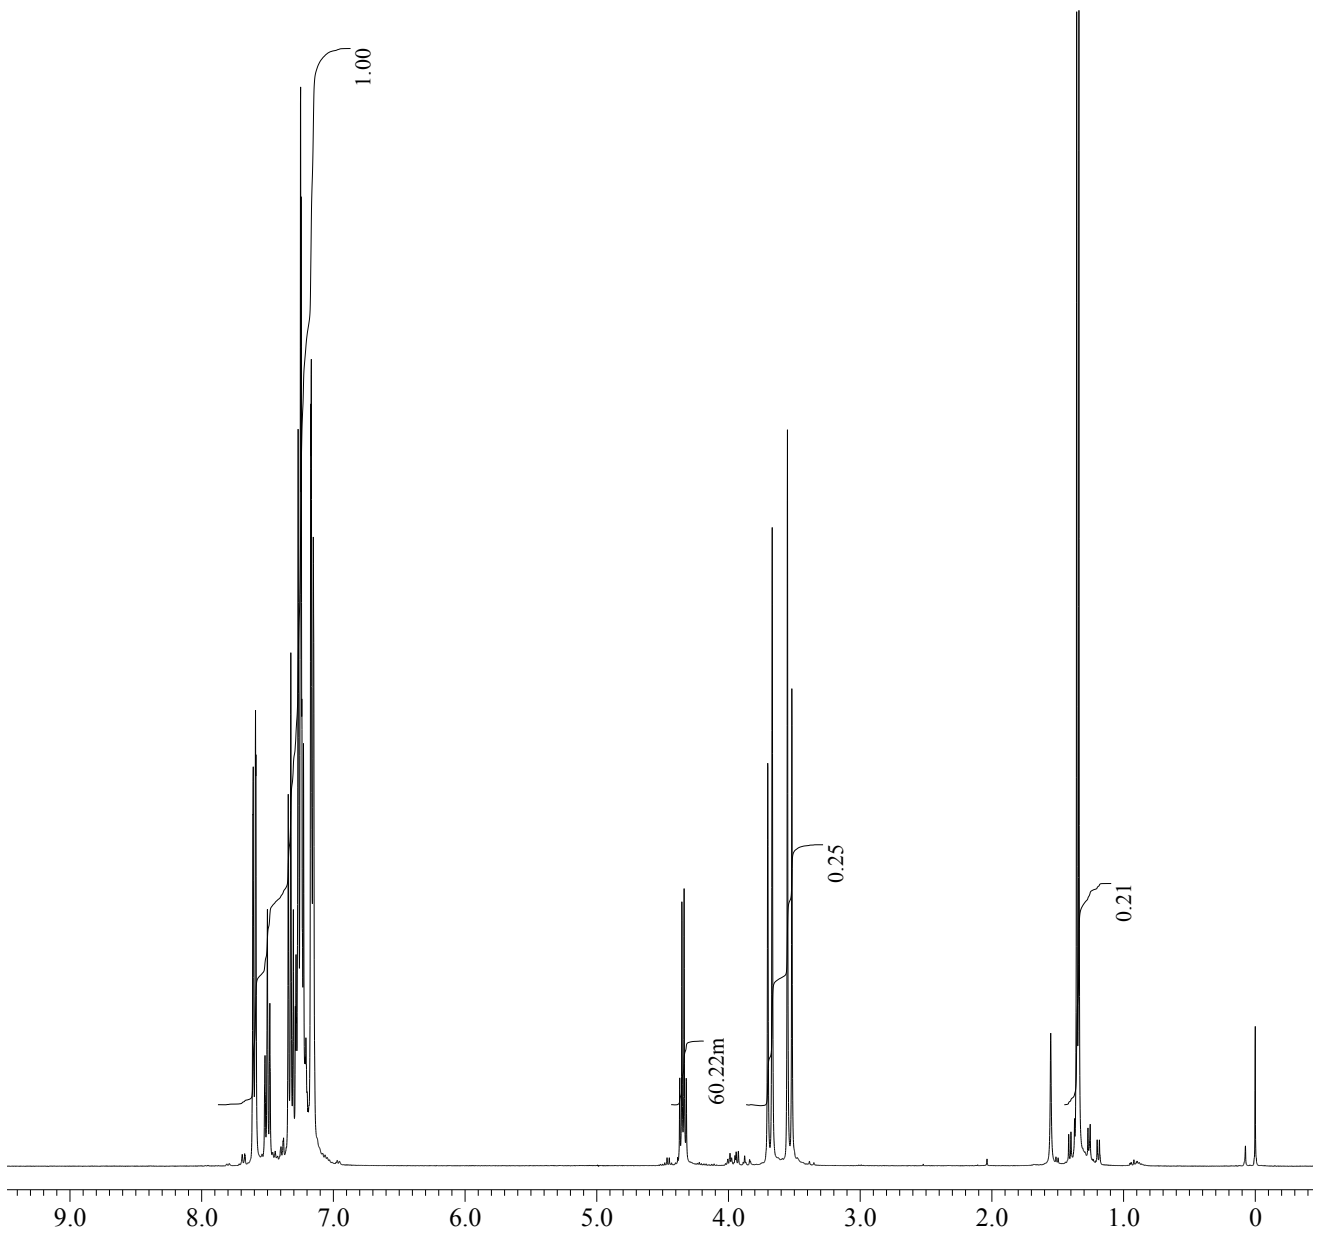

X: parts per Million: 1H



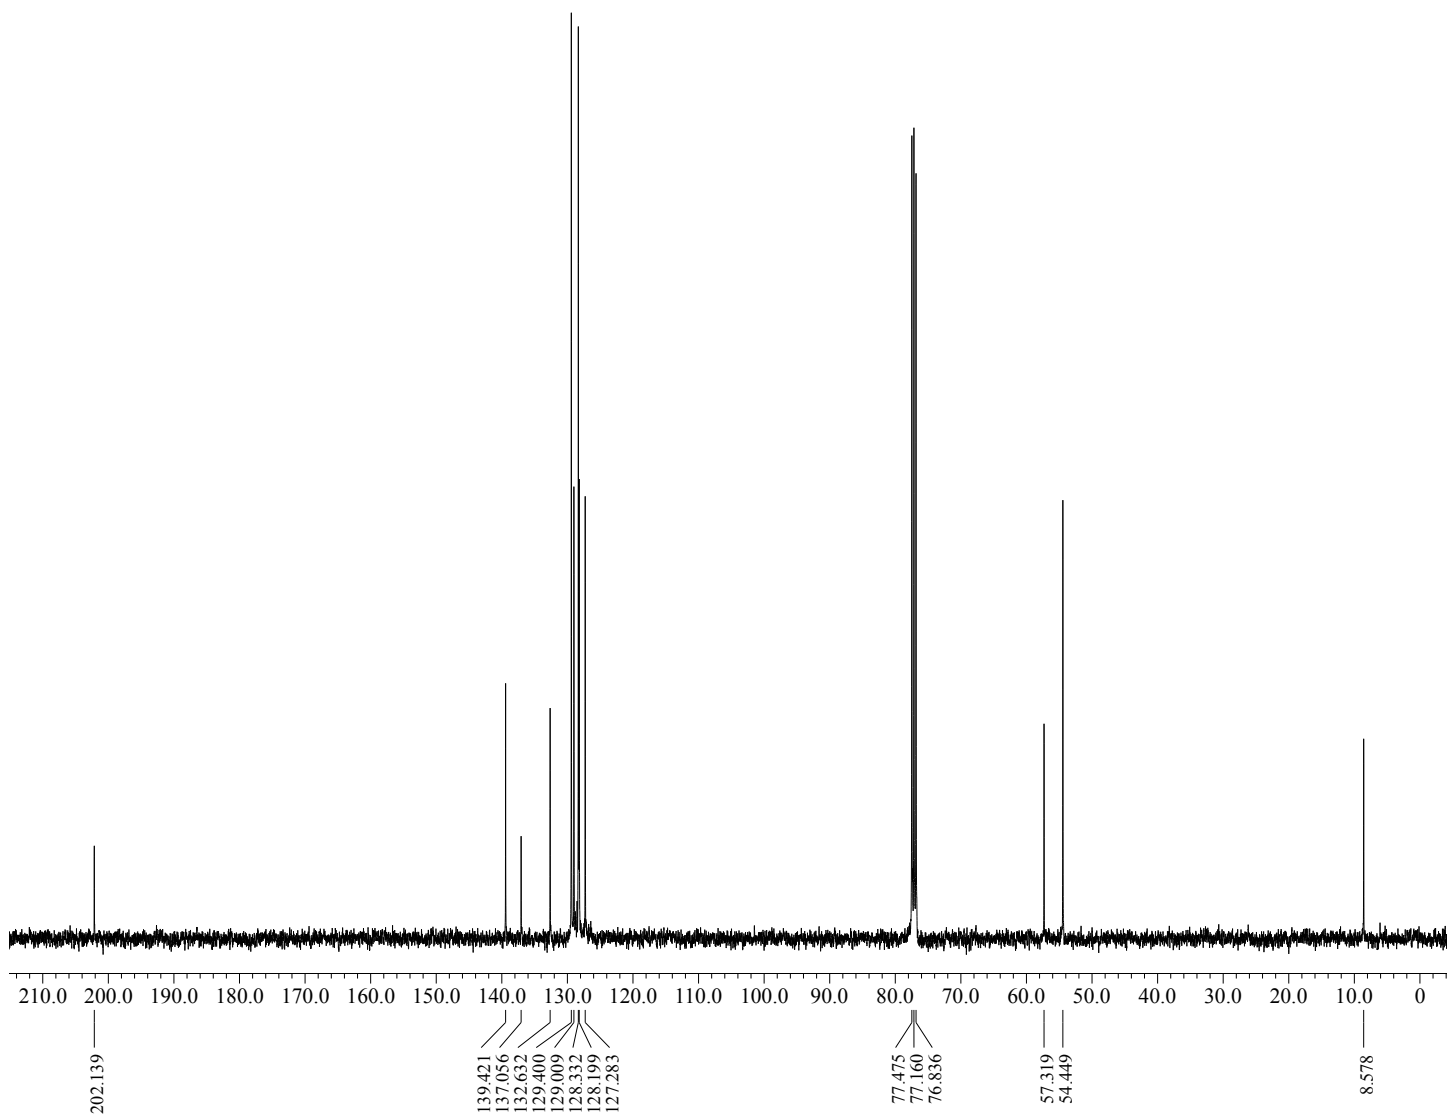

X: parts per Million: <sup>13</sup>C

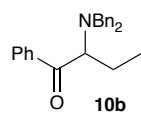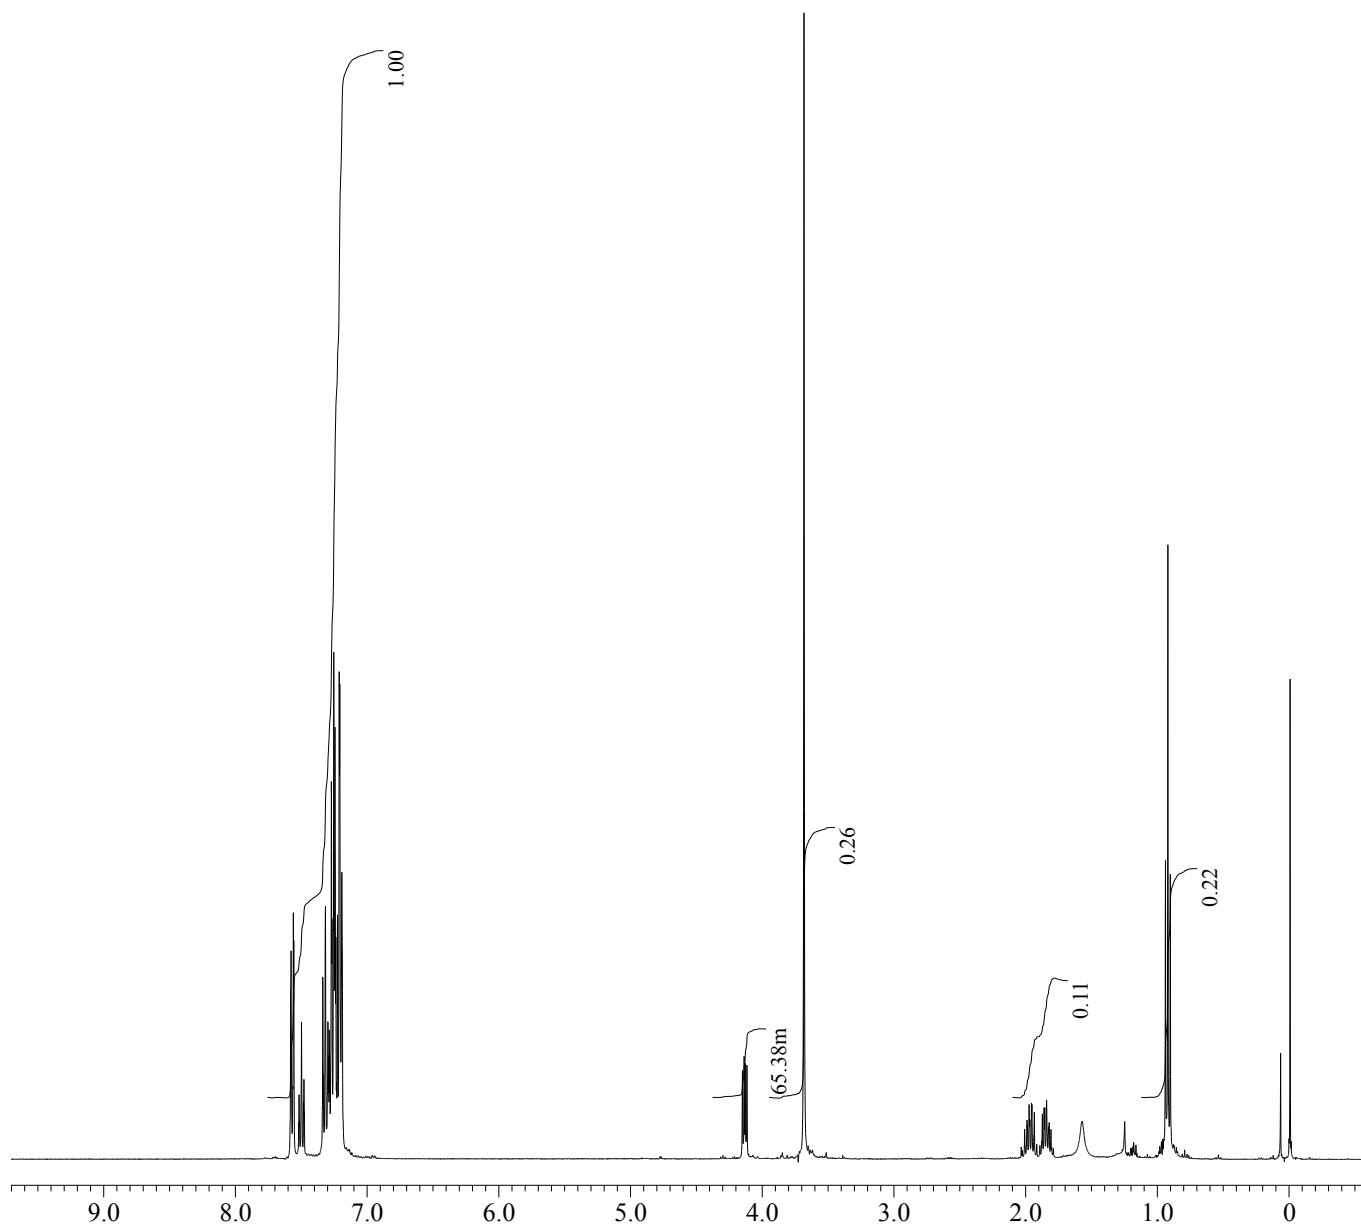

X: parts per Million: 1H

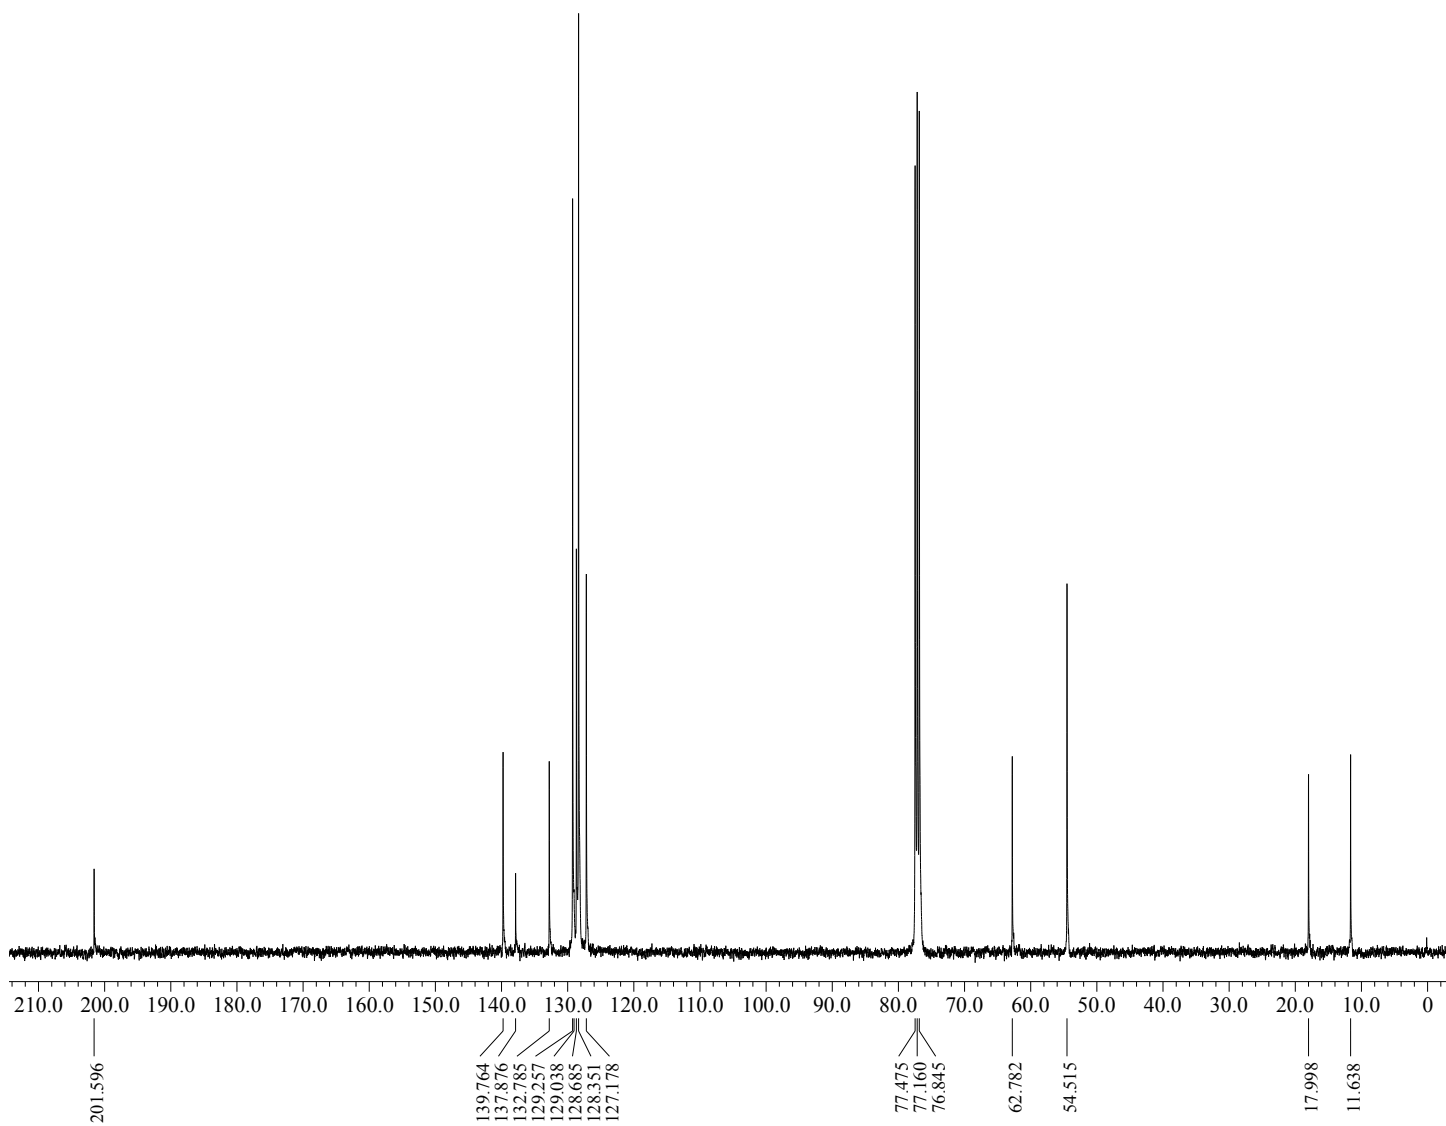

X: parts per Million: 13C

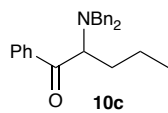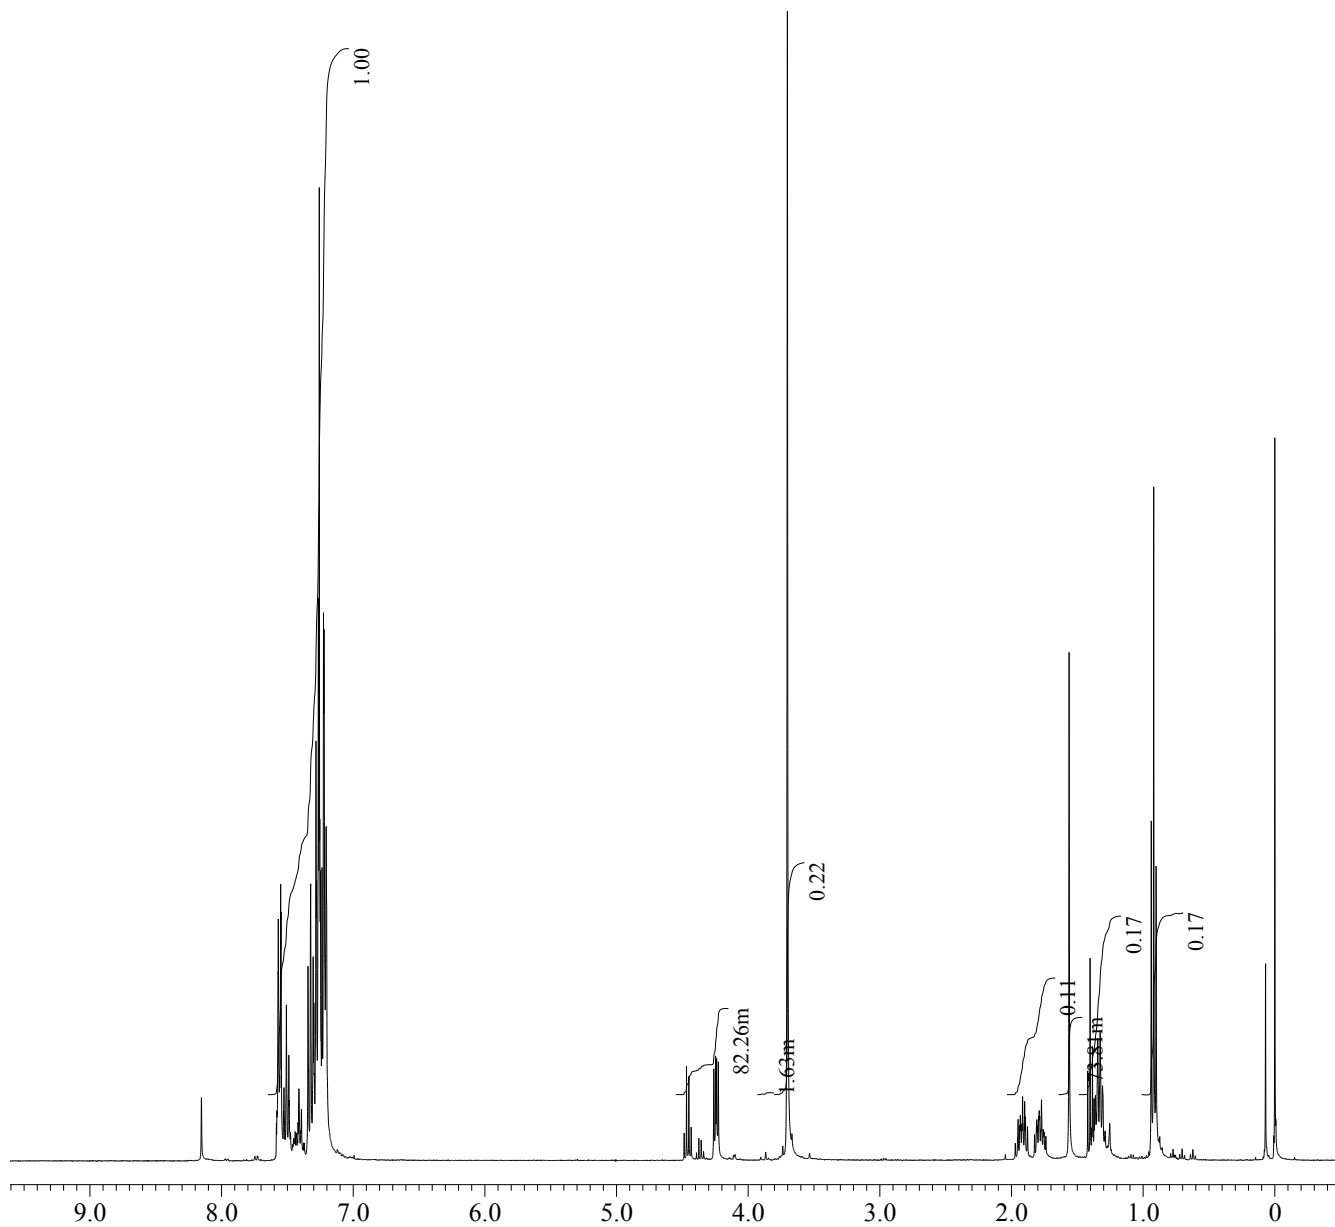

X: parts per Million: 1H

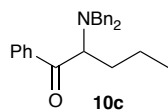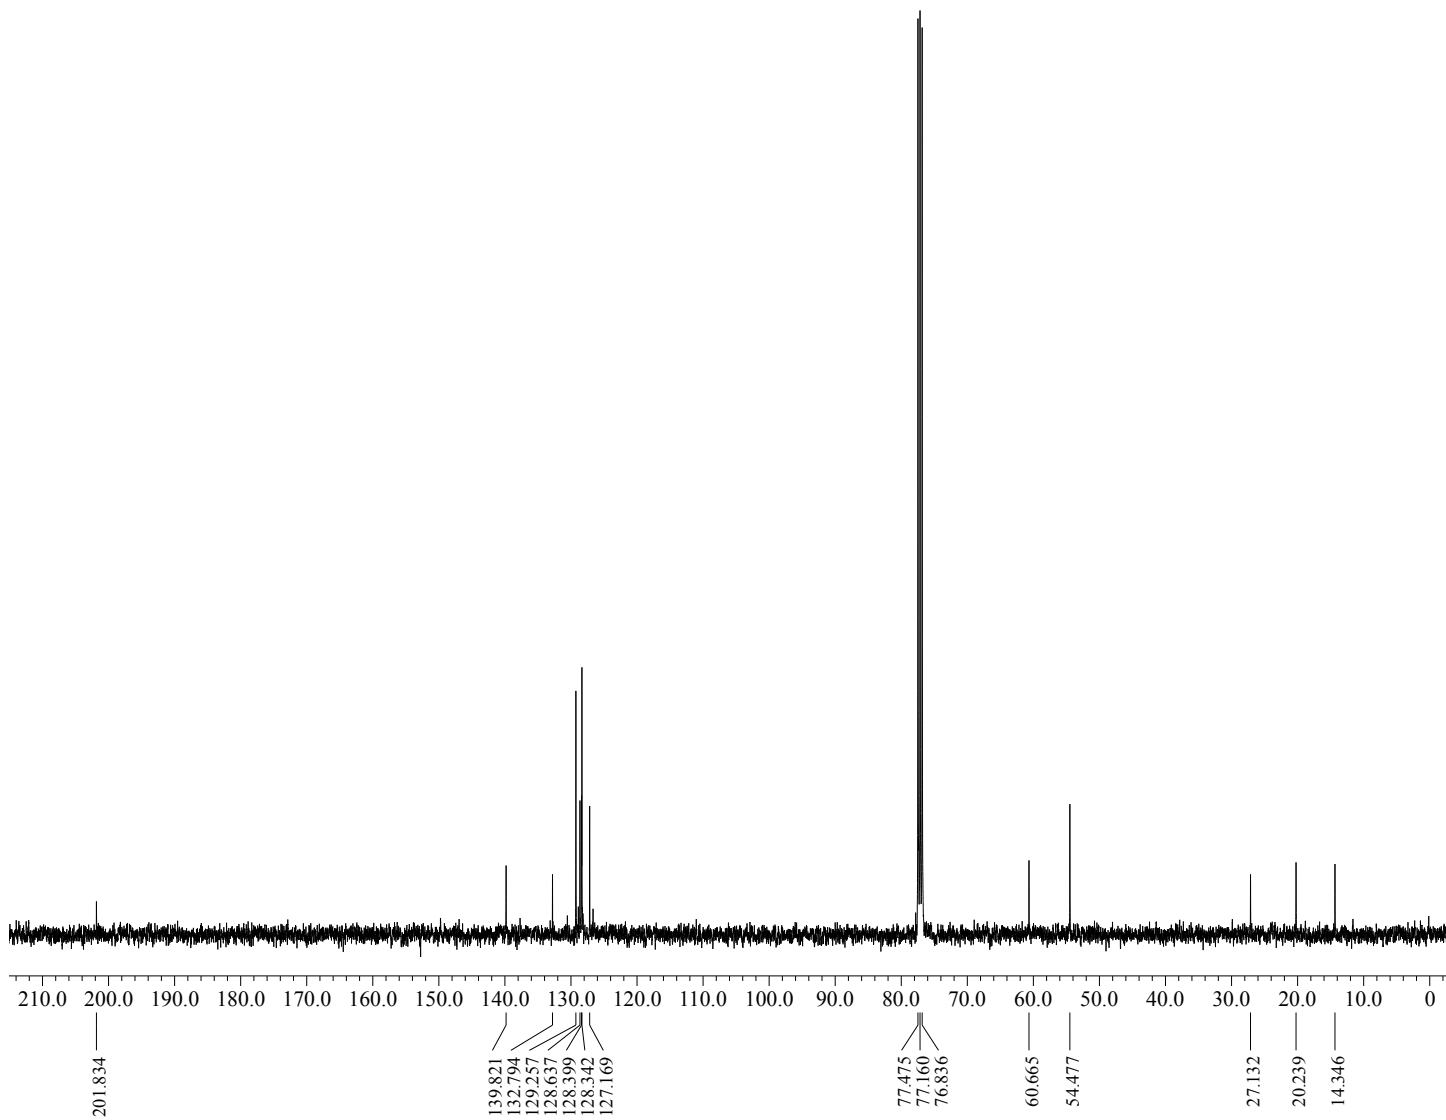

X: parts per Million: 13C

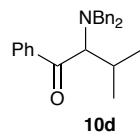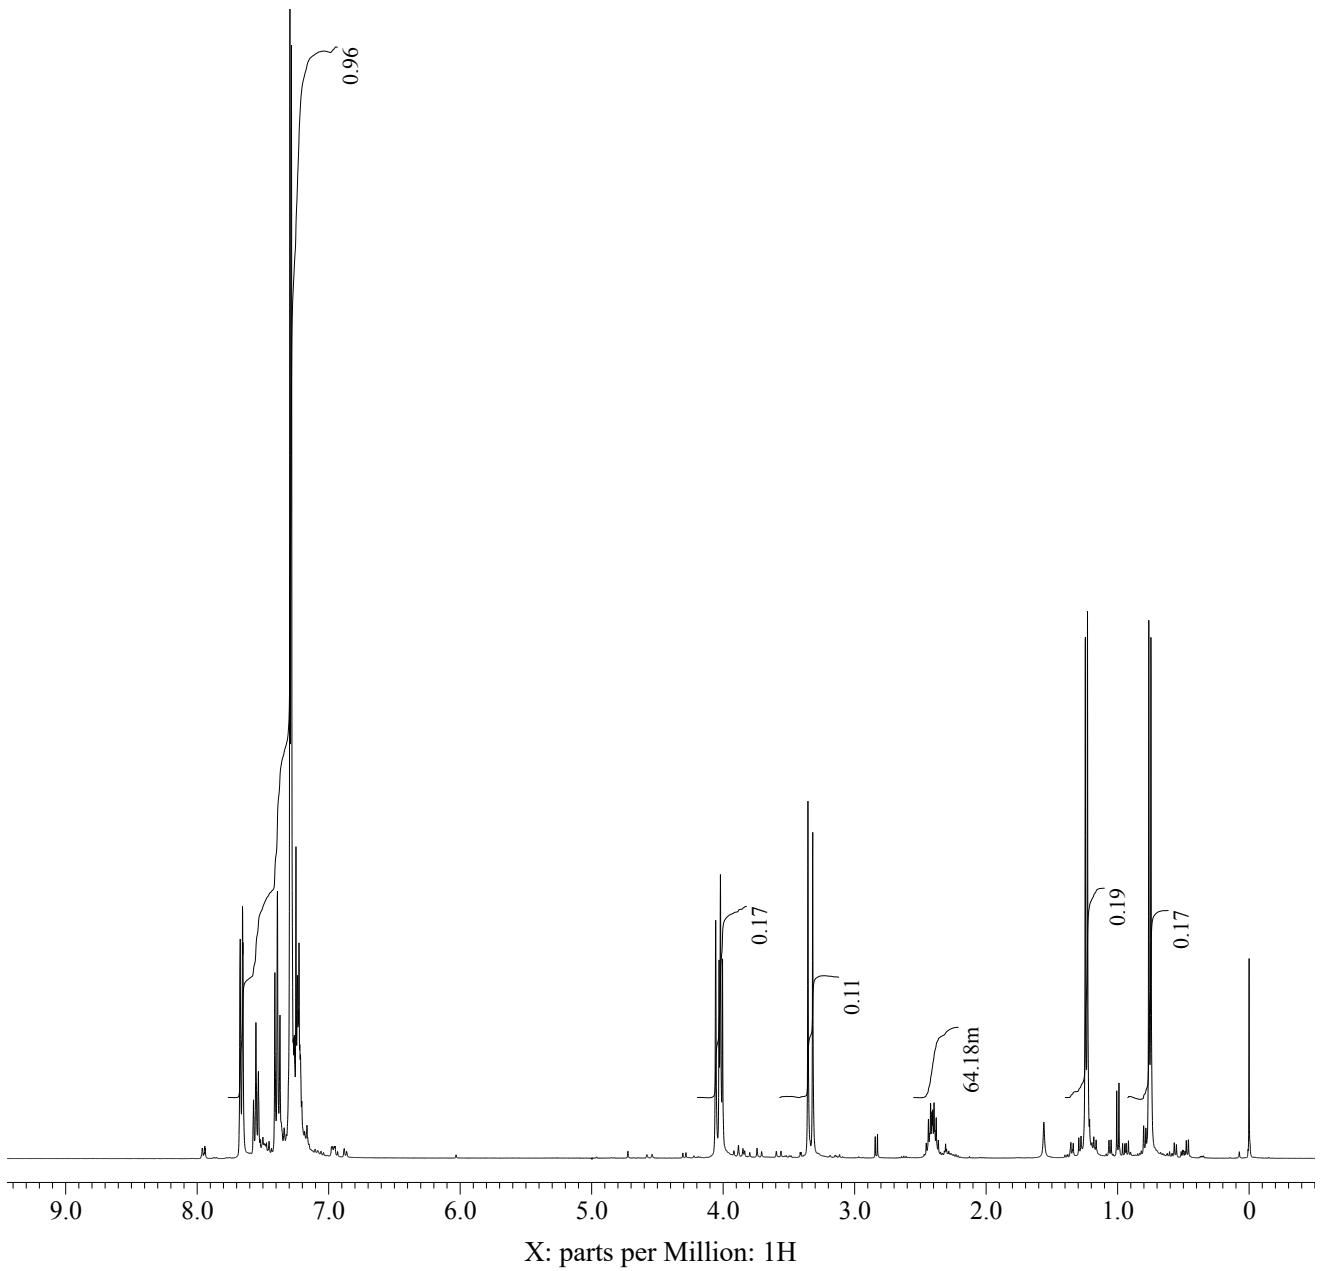

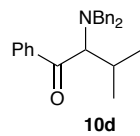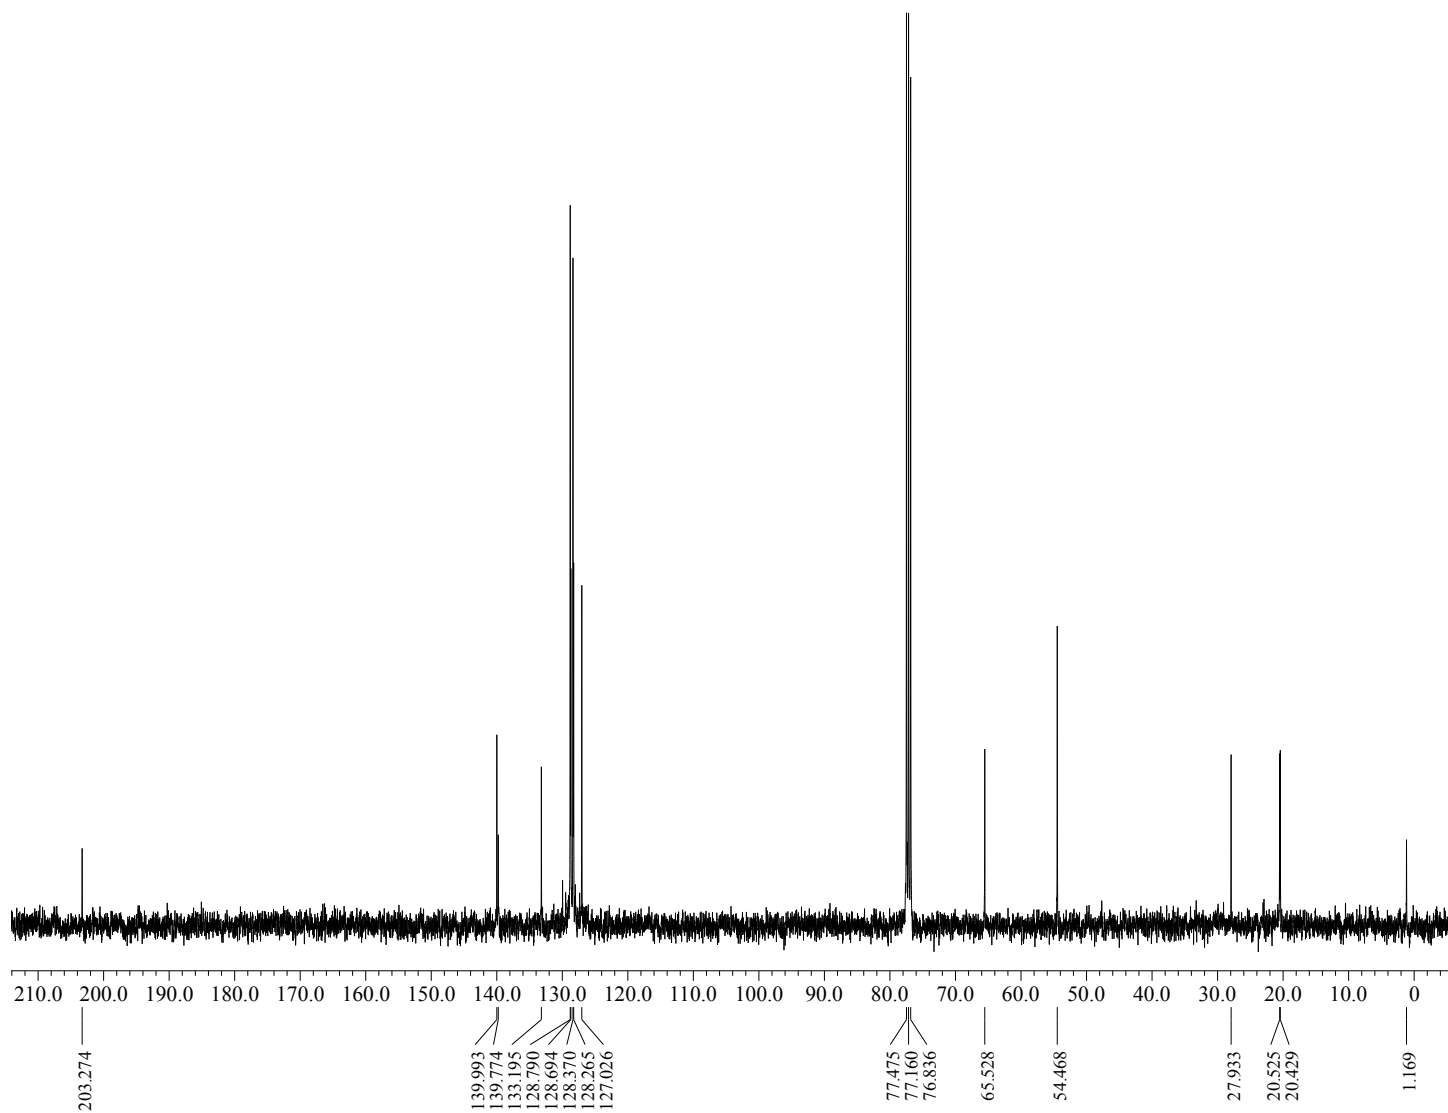

X: parts per Million: <sup>13</sup>C

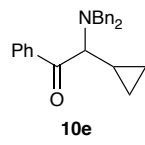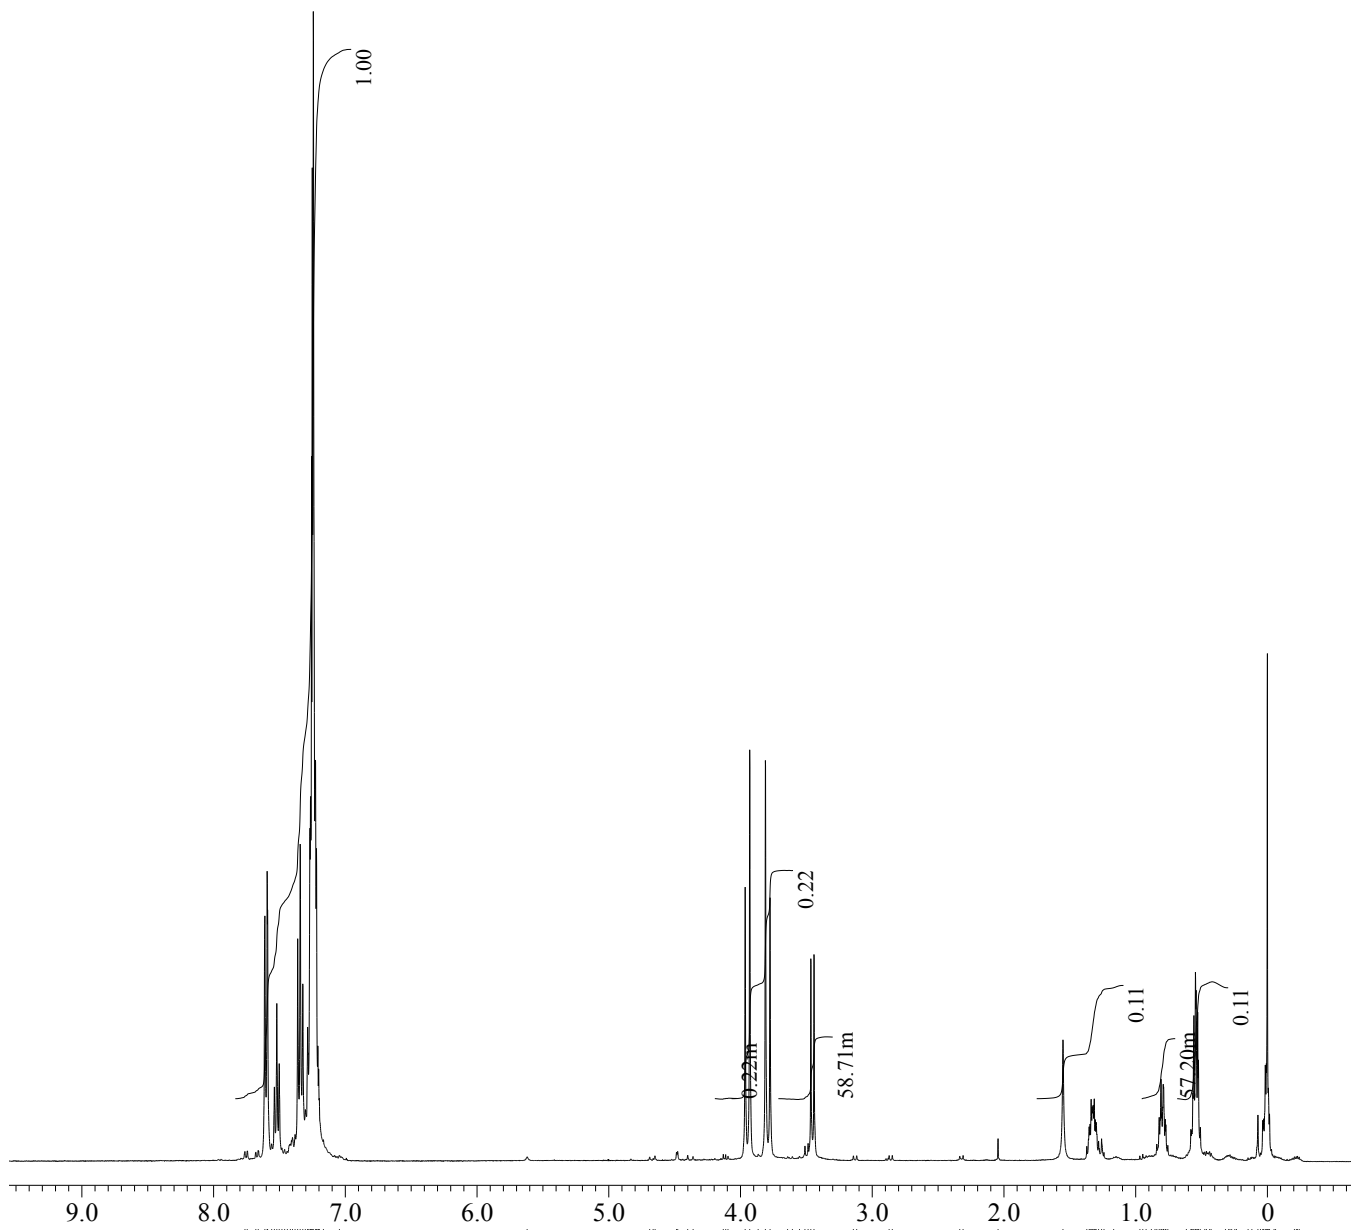

X: parts per Million: 1H



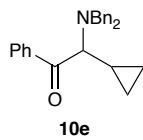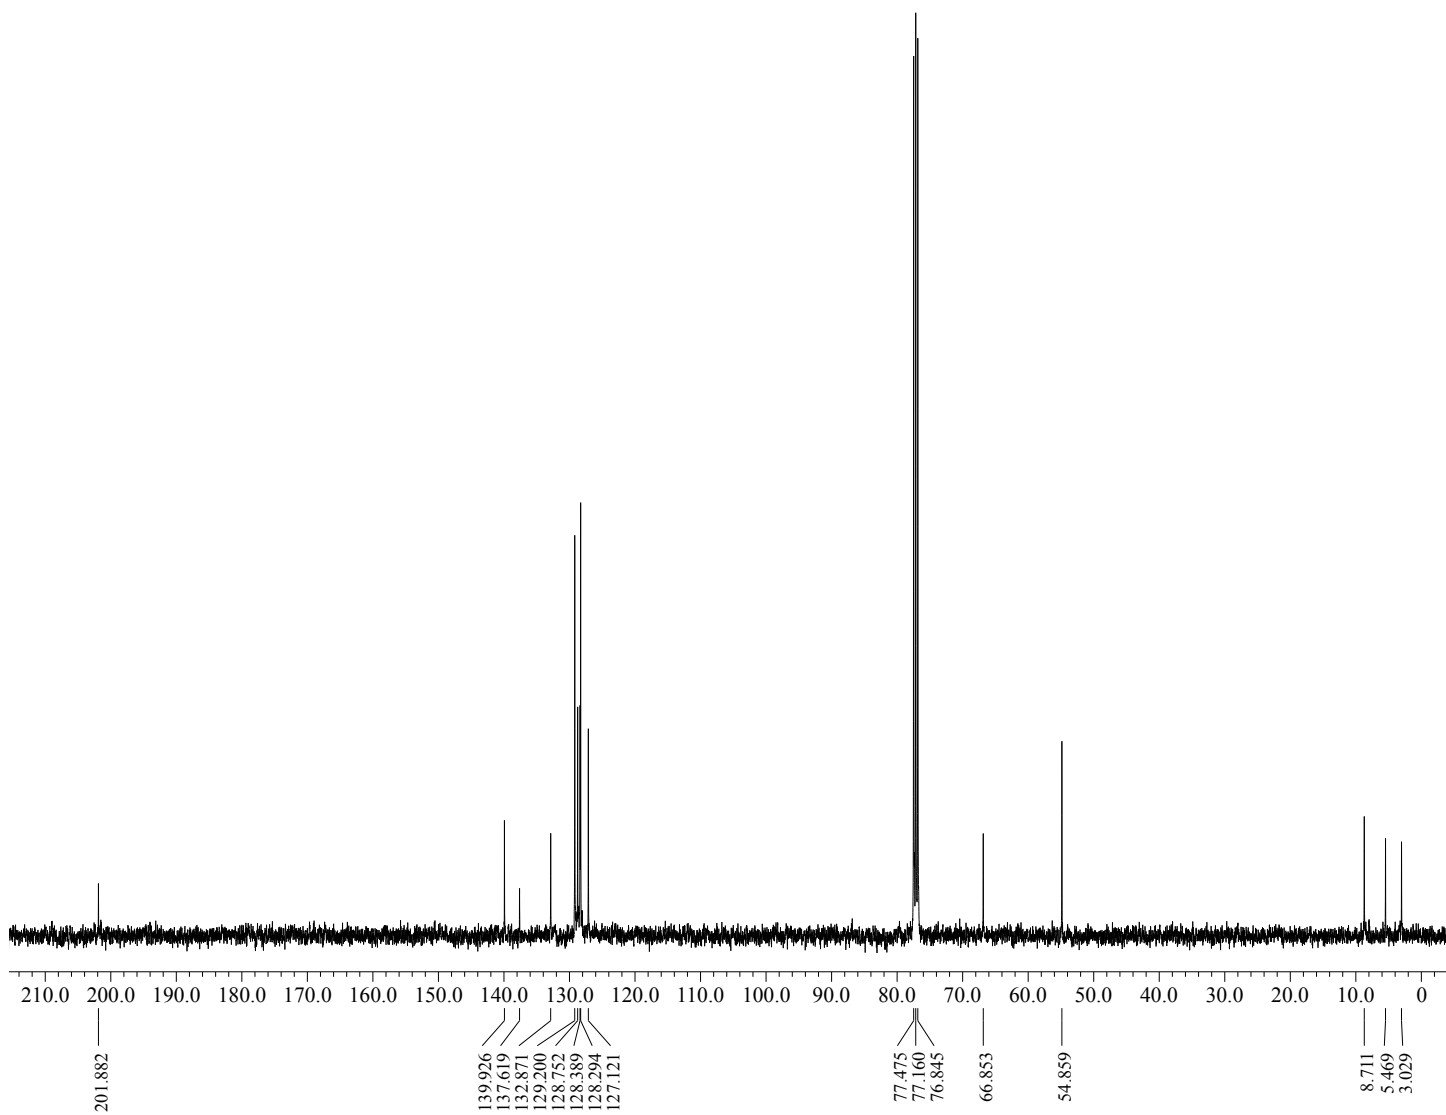

X: parts per Million: 13C

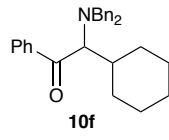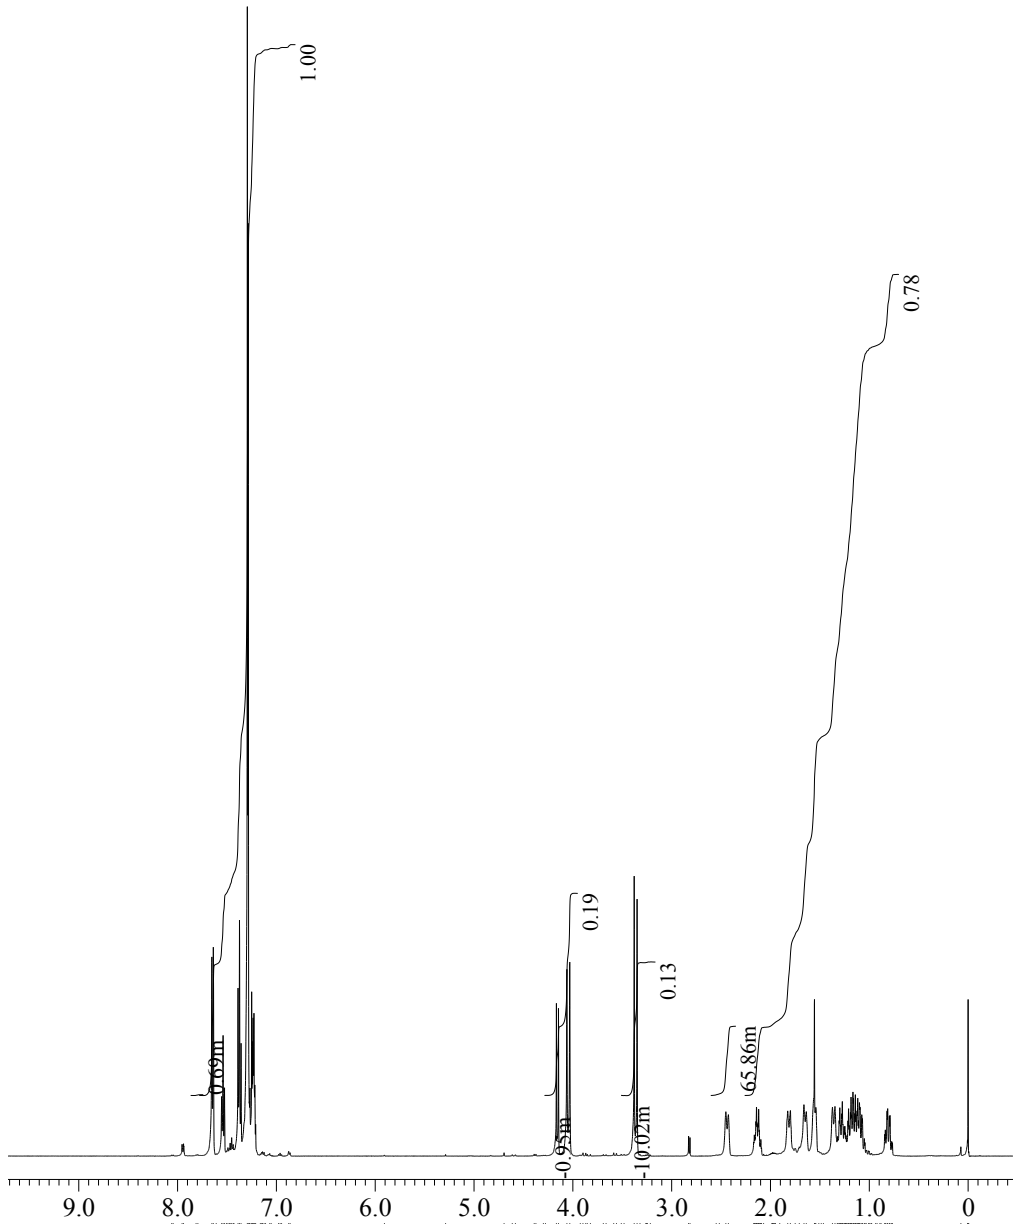

X: parts per Million: 1H

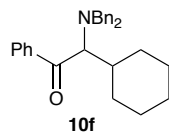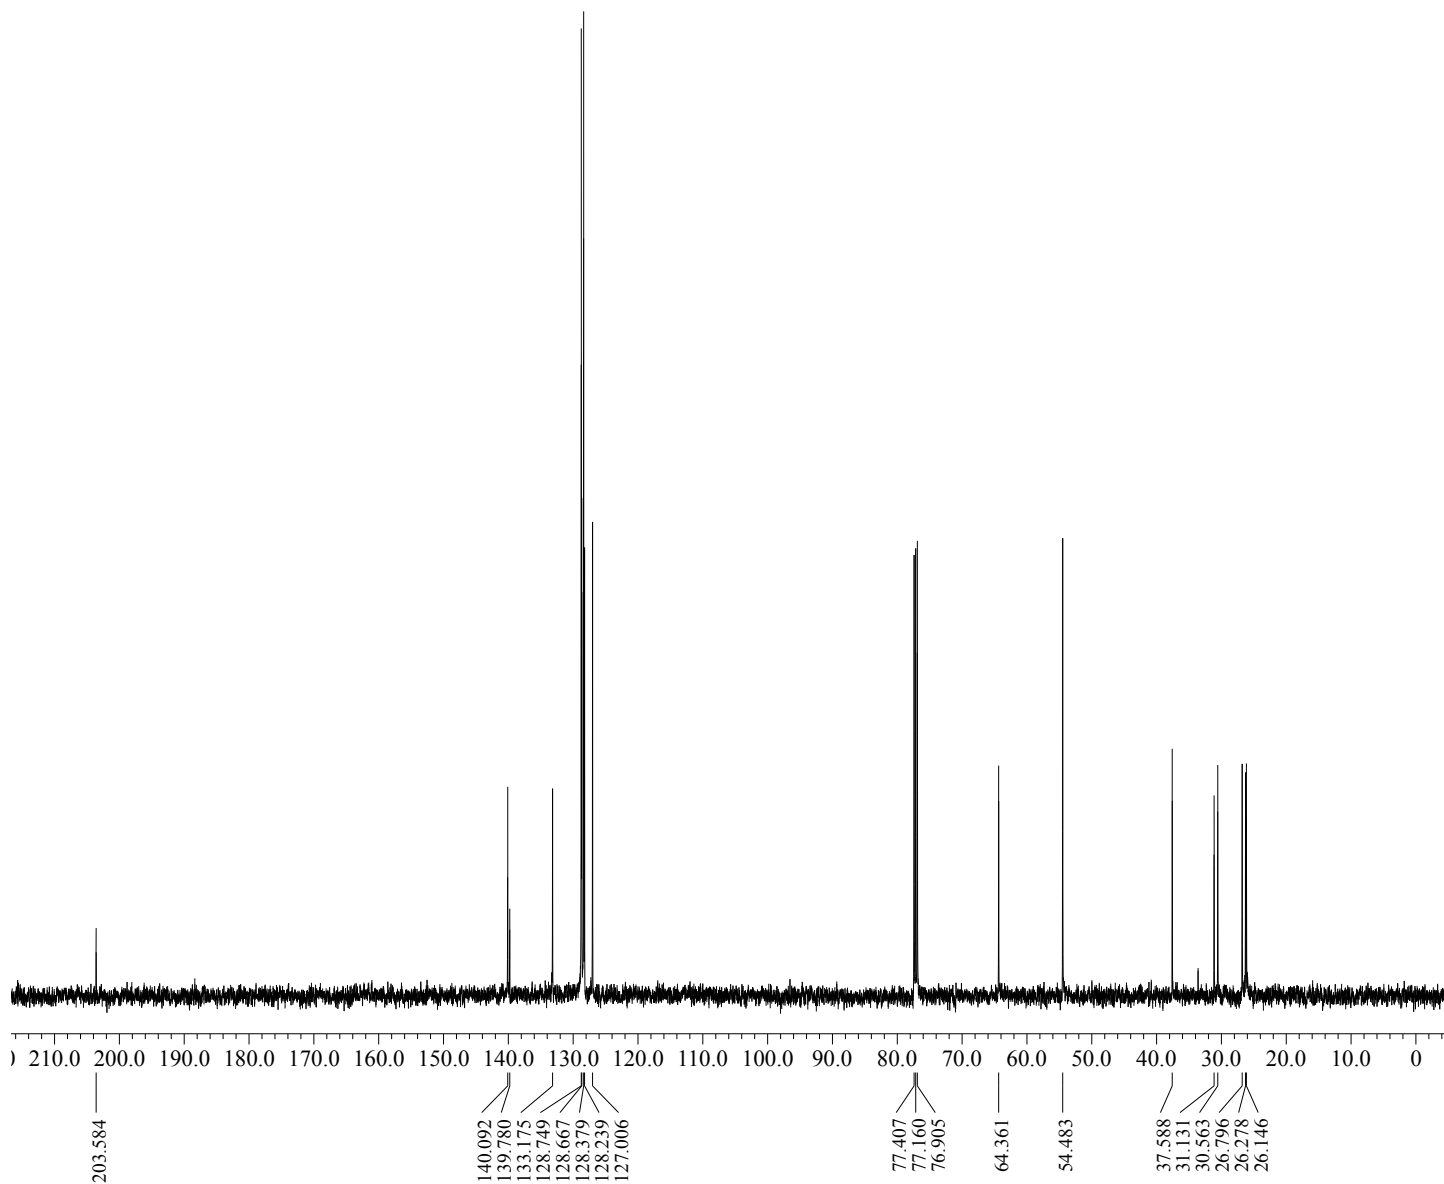

X: parts per Million: 13C

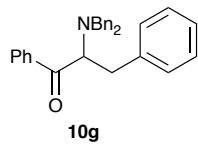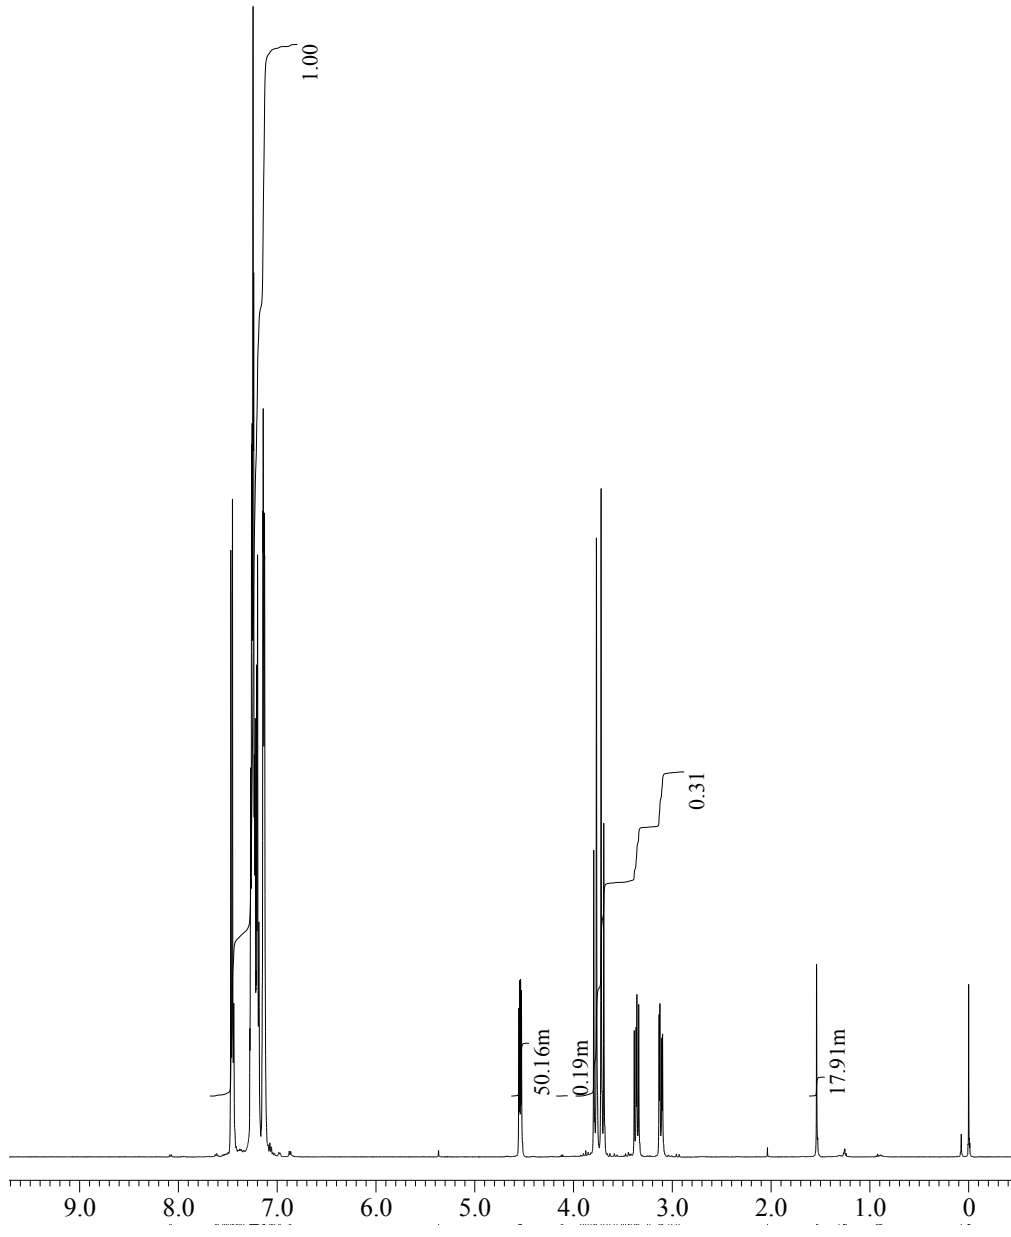

X: parts per Million: 1H

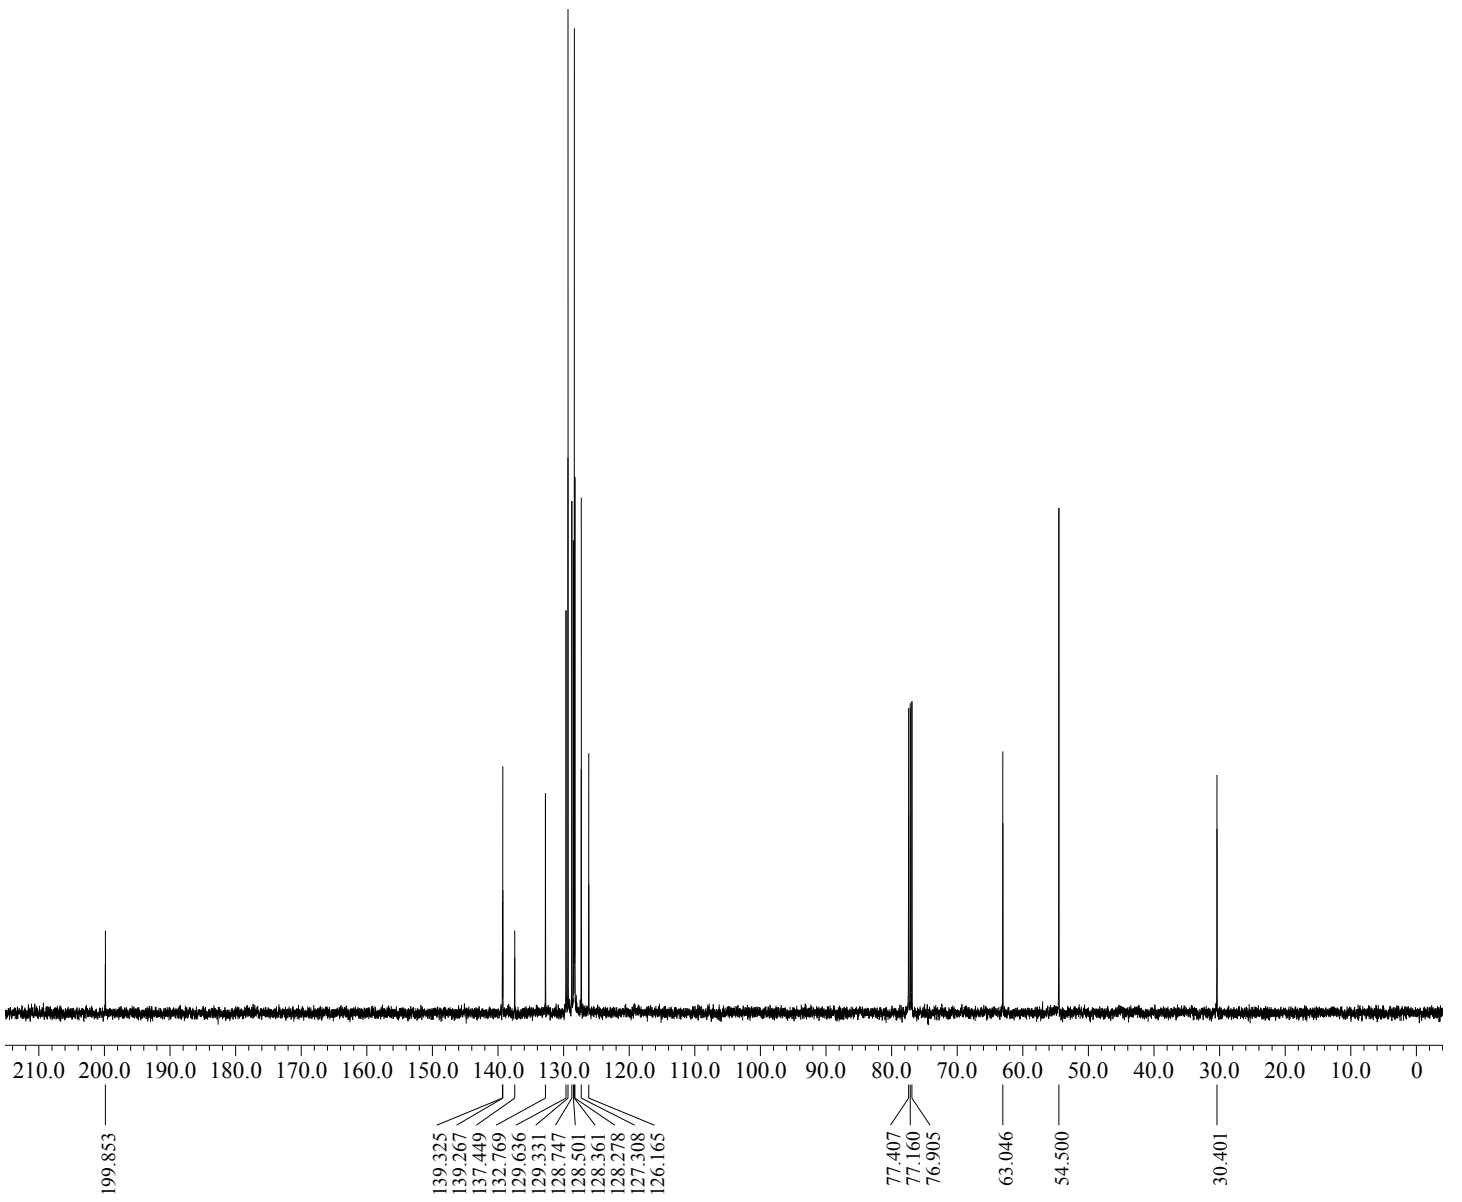

X: parts per Million: 13C

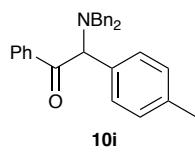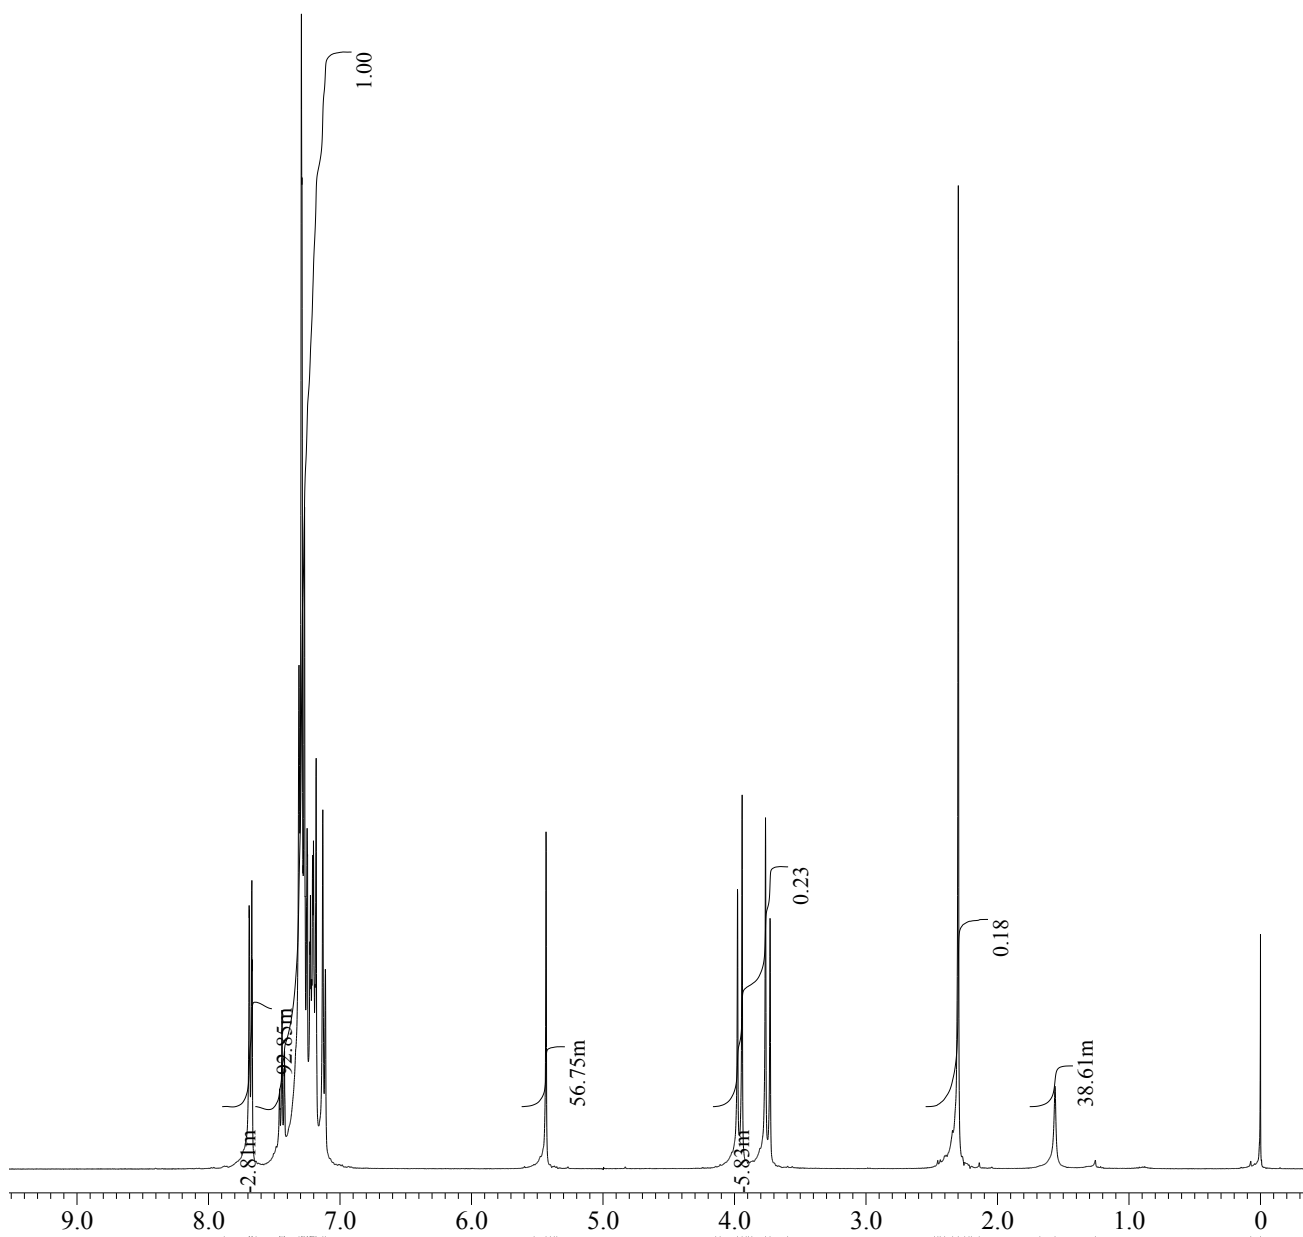

X: parts per Million: 1H

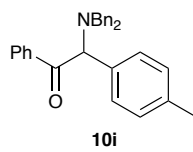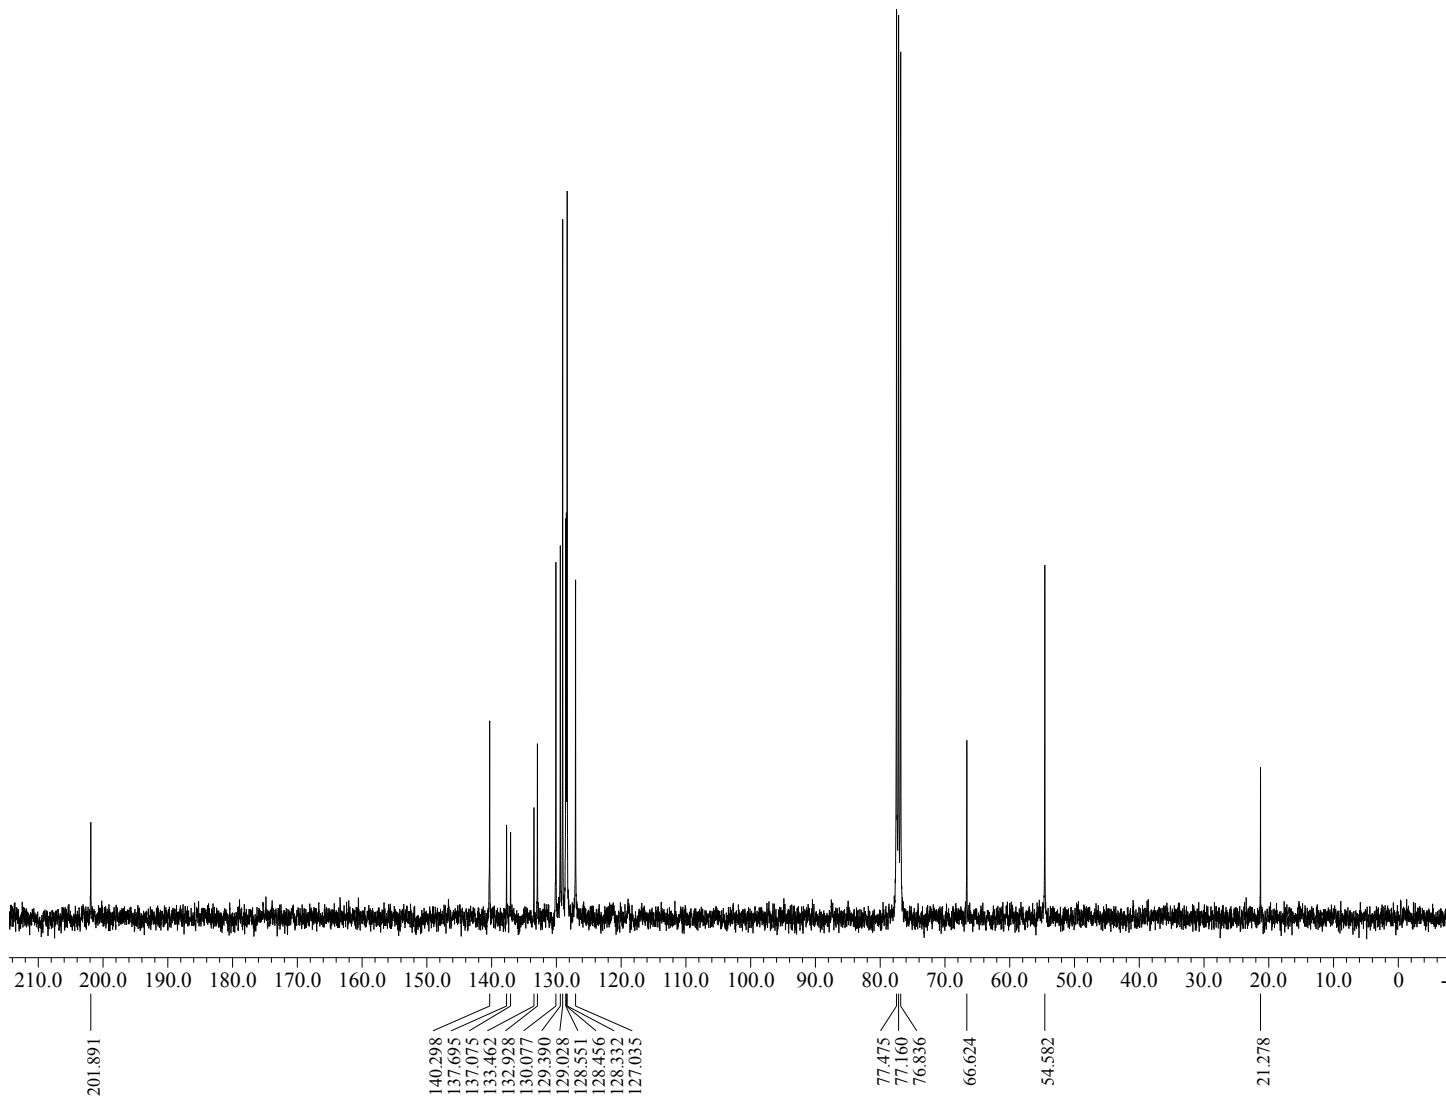

X: parts per Million: 13C

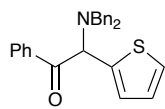

10j

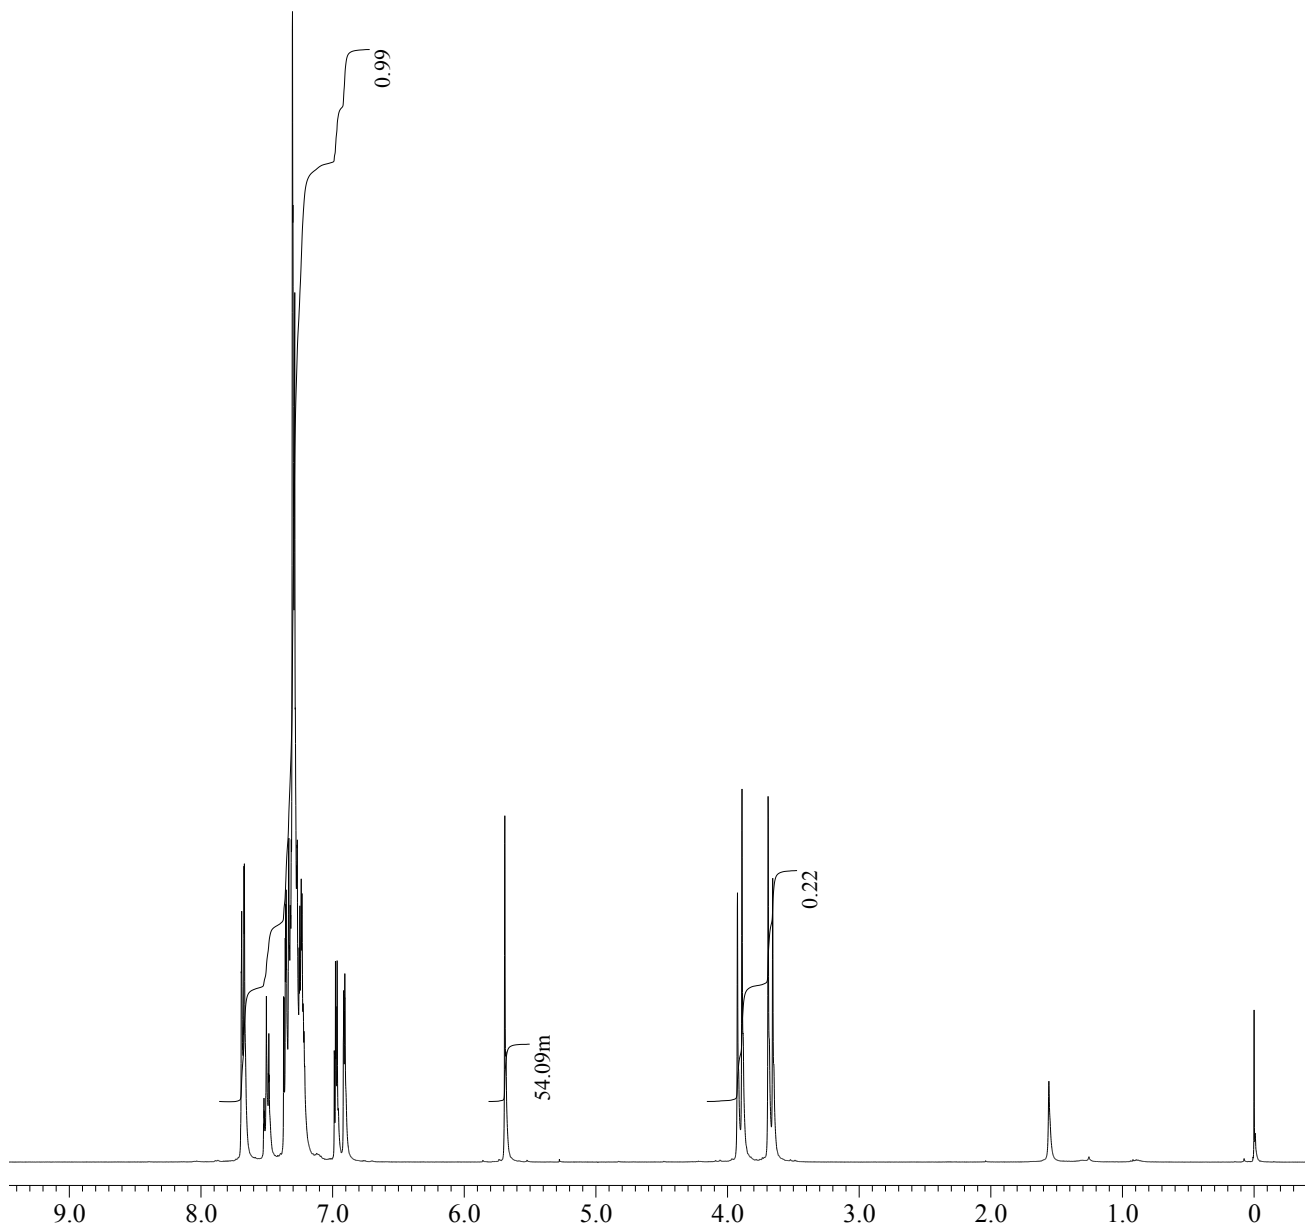

X: parts per Million: 1H



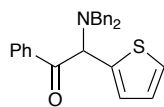

10j

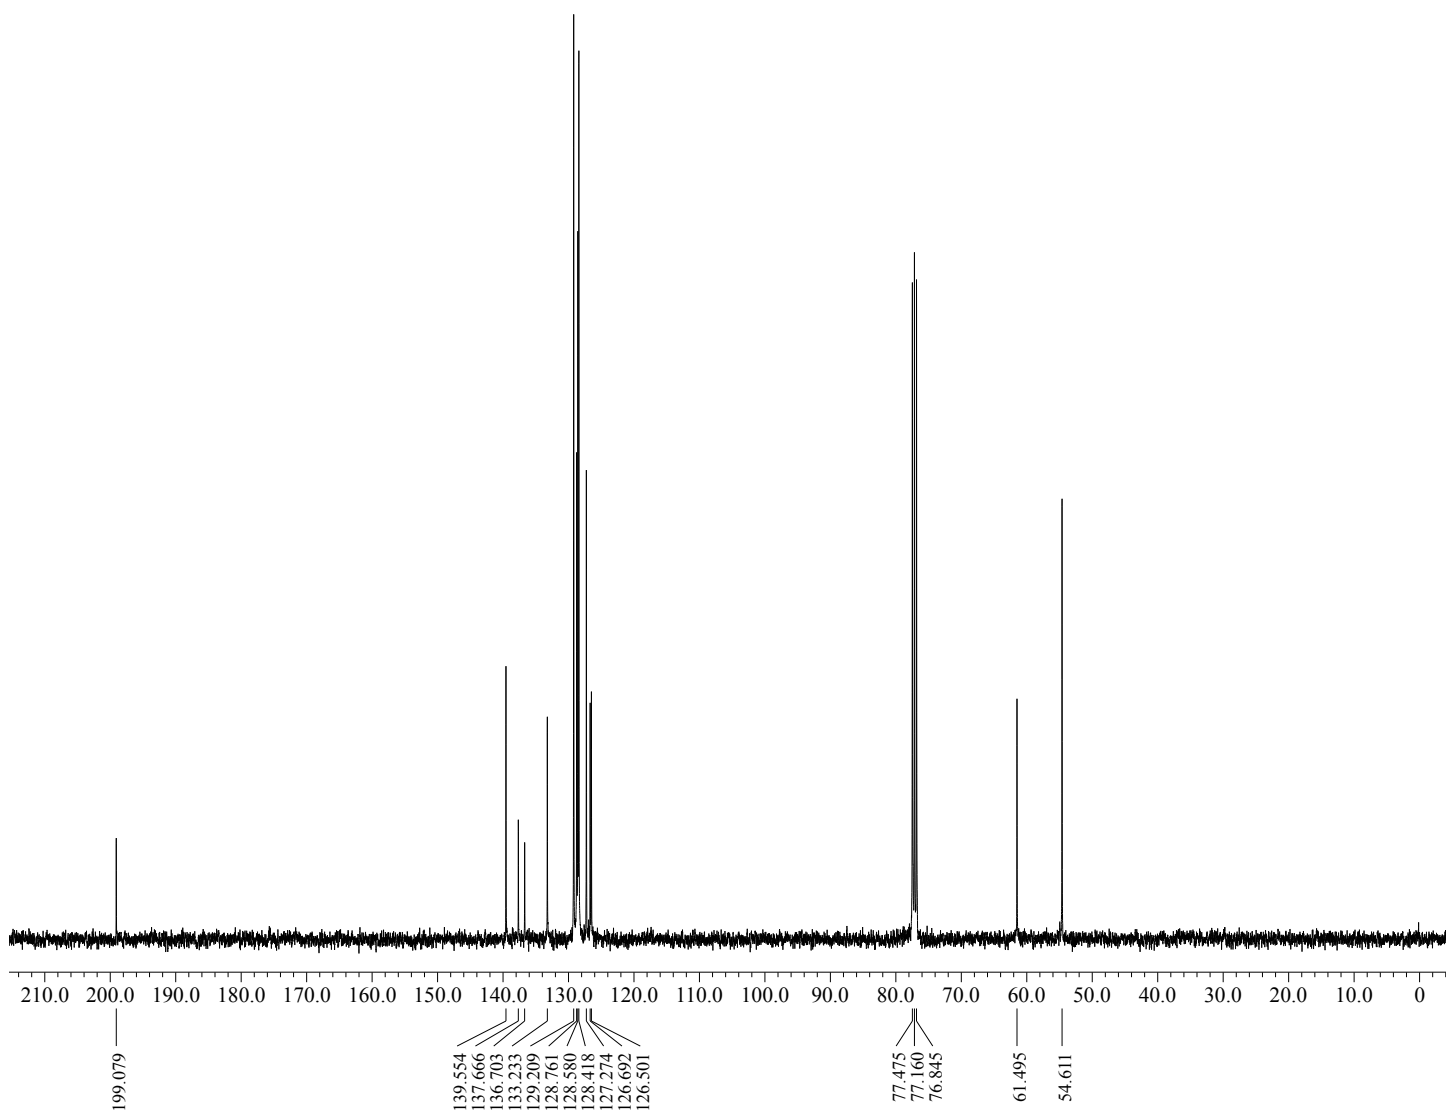

X: parts per Million: 13C
